# Supplementary material for: KidneyGenAfrica: A multi-cohort Genome-wide association study and polygenic prediction of kidney function in 110,000 continental and diasporan Africans
Source: Research Square preprint supplement (doi:10.21203/rs.3.rs-5555692/v1), 2024-12-19
Supplement: Supplementary file 1 [file 07bb6af44659d1c9c2a9df90.xlsx]

## Sheet: Sheet1
Table.S3 Details on fine-mapping signals in the Pan African meta-analysis. Genetic positions are in Build 37 (hg19).
Chromosome	Start	End	rsID of variant with highest PP	MAF	PP	CS99 size	Functional consequences	Most severe consequence	Nearest gene	RegulomeDB score	rsID (PP > 0.9)	Group PP	Group size (r2>0.8)
2	73464631	74464631	rs11894953	0.4943	0.519657	49	upstream_gene_variant, regulatory region variant	upstream_gene_variant	TPRKB	1f, 0.55	n/a	A - 0.52	1
4	76910318	77910318	rs72864608	0.01	0.230889	10	upstream_gene_variant	upstream_gene_variant	SHROOM3	7, 0.18	n/a	C - 0.52	5
6	131310450	132310450	rs2781623	0.4636	0.442666	12	intergenic_variant	intergenic_variant	ARG1	6, 0.32	n/a	C - 0.50	4
6	160169081	161169081	rs316020	0.1449	0.348427	6	intron_variant, upstream_gene_variant, non_coding_transcript_variant, regulatory_region_variant	intron_variant	SLC22A2	5, 0.13	n/a	A - 0.49	2
7	786192	1786192	rs13230509	0.2975	0.973361	2	intergenic_variant, regulatory region variant	regulatory region variant	UNCX, MICALL2	4, 0.61	rs13230509	A - 0.97	1
8	31910110	32910110	rs7000590	0.3252	0.422419	21	intron_variant	intron_variant	NRG1	6, 0.78	n/a	B - 0.71	2
9	97248906	98248906	rs10993439	0.4294	0.219375	20	intron_variant, non_coding_transcript_variant	intron_variant	AOPEP	5, 0.13	n/a	C - 0.43	6
11	4748232	5748232	rs334	0.0578	1	1	missense_variant, upstream_gene_variant, non_coding_transcript_exon_variant	missense variant	HBB	4, 0.61	rs334	A - 1	1
11	5793717	6793717	rs75113983	0.022	0.629729	2	intron_variant, non_coding_transcript_variant	intron_variant	OR56B3P, OR52B1P	6, 0.35	n/a	A - 0.63	1
11	64644075	65644075	rs624307	0.0903	0.999983	8	missense_variant, downstream_gene_variant, 3_prime_UTR_variant, NMD_transcript_variant, non_coding_transcript_exon_variant	missense variant	SLC25A45	5, 0.13	rs624307	A - 1	1
15	44653405	46661483	rs1055395	0.4761	0.814364	20	non_coding_transcript_variant, intron_variant, downstream_gene_variant, upstream_gene_variant, regulatory region variant	non coding transcript exon variant	GATM	4, 0.61	n/a	B - 1	4
15	75669004	76669004	rs8034430	0.1054	0.971867	3	intron_variant, NMD_transcript_variant, upstream_gene_variant	intron_variant	UBE2Q2	7, 0.18	rs8034430	A - 0.99	2
17	18947612	19947612	rs2453577	0.1561	0.510348	5	intron_variant, non_coding_transcript_variant, regulatory region variant	intron_variant	SLC47A1	6, 0.32	n/a	A - 0.54	2
17	37043449	38043449	rs7208487	0.3394	0.310941	6	intron_variant	intron_variant	FBXL20	5, 0.59	n/a	A - 0.99	6
17	58956589	59956589	rs9895661	0.4888	0.999978	1	non_coding_transcript_exon_variant, intron_variant, upstream_gene_variant, non_coding_transcript_variant, regulatory_region_variant	non coding transcript exon variant	BCAS3	5, 0.61	rs9895661	A - 1	1
18	76660235	77660235	rs56376587	0.1943	0.999809	1	intron_variant, upstream_gene_variant, regulatory_region_variant	intron_variant	NFATC1	2b, 0.67	rs56376587	A - 1	1
