# Supplementary material for: KidneyGenAfrica: A multi-cohort Genome-wide association study and polygenic prediction of kidney function in 110,000 continental and diasporan Africans
Source: Research Square preprint supplement (doi:10.21203/rs.3.rs-5555692/v1), 2024-12-19
Supplement: Supplementary file 2 [file 2ab52de4fa8b87e3f39a312e.xlsx]

## Sheet: ST1_Tissue expression analysis
	All AFR			Continental AFR
TISSUE	BETA	SE	P	BETA	SE	P
Adipose_Subcutaneous	0.01553	0.010807	0.075372	-0.022694	0.010717	0.98288
Adipose_Visceral_Omentum	0.018521	0.011232	0.049593	-0.013915	0.011089	0.89524
Adrenal_Gland	0.0036585	0.010023	0.35755	-2.9315e-05	0.010029	0.50117
Artery_Aorta	0.0054878	0.010174	0.29481	-0.01101	0.01011	0.86191
Artery_Coronary	0.024825	0.011897	0.01847	-0.019183	0.011811	0.94782
Artery_Tibial	0.019017	0.01002	0.028865	-0.018694	0.0099339	0.97006
Bladder	0.031679	0.013119	0.0078801	-0.025209	0.013046	0.97333
Brain_Amygdala	-0.027894	0.0078581	0.99981	0.019653	0.0077889	0.0058185
Brain_Anterior_cingulate_cortex_BA24	-0.027131	0.0072355	0.99991	0.01685	0.007172	0.009407
Brain_Caudate_basal_ganglia	-0.029075	0.0078954	0.99988	0.017499	0.007826	0.012682
Brain_Cerebellar_Hemisphere	-0.026636	0.0060704	0.99999	0.0080666	0.0060623	0.091667
Brain_Cerebellum	-0.026537	0.0062673	0.99999	0.01036	0.0062518	0.048748
Brain_Cortex	-0.02947	0.0071356	0.99998	0.015637	0.007096	0.01378
Brain_Frontal_Cortex_BA9	-0.029159	0.0068732	0.99999	0.013396	0.0068327	0.024973
Brain_Hippocampus	-0.03167	0.0079969	0.99996	0.019294	0.007929	0.0074852
Brain_Hypothalamus	-0.031209	0.0081035	0.99994	0.024945	0.008021	0.00093718
Brain_Nucleus_accumbens_basal_ganglia	-0.026786	0.0076262	0.99978	0.020468	0.0075536	0.0033705
Brain_Putamen_basal_ganglia	-0.030775	0.0079542	0.99995	0.015576	0.007893	0.024235
Brain_Spinal_cord_cervical_c-1	-0.040688	0.0085738	1	0.012347	0.008537	0.074051
Brain_Substantia_nigra	-0.036656	0.0085497	0.99999	0.013731	0.008497	0.053064
Breast_Mammary_Tissue	0.028216	0.012638	0.012791	-0.026553	0.012612	0.98237
Cells_Cultured_fibroblasts	-0.0082512	0.0065475	0.89619	-0.0079977	0.0065153	0.89018
Cells_EBV-transformed_lymphocytes	0.00076217	0.0048875	0.43804	-0.0011732	0.004851	0.59555
Cervix_Ectocervix	0.030485	0.012159	0.0060892	-0.0032912	0.012071	0.60744
Cervix_Endocervix	0.023109	0.011605	0.023237	-0.0030456	0.011489	0.60453
Colon_Sigmoid	0.01414	0.012439	0.12783	-0.022043	0.012419	0.96203
Colon_Transverse	0.02846	0.011626	0.0071909	-0.030301	0.011484	0.99583
Esophagus_Gastroesophageal_Junction	0.0039813	0.012801	0.37789	-0.033345	0.012689	0.9957
Esophagus_Mucosa	0.010464	0.0076627	0.086041	-0.0048114	0.0076161	0.73622
Esophagus_Muscularis	0.00033694	0.012387	0.48915	-0.031174	0.012282	0.99442
Fallopian_Tube	0.028336	0.011829	0.0083051	-0.0069982	0.011797	0.72348
Heart_Atrial_Appendage	0.012945	0.0095931	0.088608	-0.0094484	0.0095412	0.83897
Heart_Left_Ventricle	0.0090047	0.0091673	0.16299	-0.010386	0.0090619	0.87412
Kidney_Cortex	0.043564	0.0090835	8.1651e-07	-0.0065992	0.0089413	0.76976
Kidney_Medulla	0.032414	0.0093273	0.00025589	-0.009675	0.0092345	0.8526
Liver	0.013893	0.0064434	0.01554	-0.010216	0.0063212	0.94696
Lung	0.026345	0.0091884	0.0020731	-0.00034603	0.0091533	0.51508
Minor_Salivary_Gland	0.011076	0.0096474	0.12549	-0.013903	0.0096412	0.92534
Muscle_Skeletal	0.0076706	0.0069606	0.13524	-0.012527	0.0068392	0.96649
Nerve_Tibial	0.012144	0.010064	0.11378	-0.0021601	0.0099808	0.58567
Ovary	0.0056611	0.0096495	0.27872	0.0073085	0.0095825	0.22283
Pancreas	0.015465	0.008465	0.033865	0.0023265	0.0083606	0.39041
Pituitary	-0.00041876	0.0089945	0.51857	0.021274	0.0089158	0.0085183
Prostate	0.034353	0.011982	0.0020733	-0.00095932	0.011933	0.53204
Skin_Not_Sun_Exposed_Suprapubic	0.0098414	0.0077958	0.10341	-0.011982	0.007721	0.93965
Skin_Sun_Exposed_Lower_leg	0.011257	0.0078228	0.075081	-0.01237	0.0077477	0.94482
Small_Intestine_Terminal_Ileum	0.013949	0.0096535	0.07425	-0.020087	0.009541	0.98236
Spleen	0.016382	0.0073964	0.013393	-0.002586	0.0073251	0.63797
Stomach	0.037768	0.012138	0.00093238	-0.0087739	0.01196	0.7684
Testis	0.0060567	0.0056194	0.14057	0.01652	0.0055694	0.0015095
Thyroid	0.017567	0.0096427	0.034256	-0.0096462	0.0096461	0.84134
Uterus	0.017112	0.010919	0.05854	-0.0096329	0.010845	0.81279
Vagina	0.035568	0.011072	0.00065961	-0.0068515	0.010991	0.73348
Whole_Blood	0.013263	0.0056927	0.0099142	-0.0068439	0.0055914	0.88952

## Sheet: ST2_GWS Gene-based analysis
ALL AFRICA										CONTINENTAL AFRICA
GENE	SYMBOL	CHR	START	STOP	NSNPS	NPARAM	N	ZSTAT	P	GENE	SYMBOL	CHR	START	STOP	NSNPS	NPARAM	N	ZSTAT	P
ENSG00000138606	SHF	15	45459412	45493373	268	85	55779	7.4481	4.7351e-14	ENSG00000171766	GATM	15	45653322	45694525	124	17	28220	6.9783	1.494e-12
ENSG00000169752	NRG4	15	76228310	76352136	1004	71	62501	6.6627	1.3441e-11	ENSG00000171763	SPATA5L1	15	45694529	45713617	78	15	28220	6.6165	1.8396e-11
ENSG00000140254	DUOXA1	15	45409569	45422136	94	42	51060	6.5706	2.5056e-11
ENSG00000137857	DUOX1	15	45422131	45457774	287	81	57993	6.1094	5e-10
ENSG00000137860	SLC28A2	15	45544428	45568149	196	34	57321	6.1094	5e-10
ENSG00000171766	GATM	15	45653322	45694525	267	52	54184	6.1094	5e-10
ENSG00000171763	SPATA5L1	15	45694529	45713617	134	34	60462	6.1094	5e-10
ENSG00000108306	FBXL20	17	37415384	37558776	1222	78	42613	5.7896	3.5285e-09
ENSG00000140367	UBE2Q2	15	76135622	76193419	461	63	57738	5.6243	9.3133e-09
ENSG00000104154	SLC30A4	15	45771809	45815005	240	54	49474	5.5804	1.2e-08
ENSG00000142494	SLC47A1	17	19398698	19482347	651	146	54168	5.552	1.4124e-08
ENSG00000166920	C15orf48	15	45722727	45740959	228	17	60744	5.5422	1.4934e-08
ENSG00000167196	FBXO22	15	76196200	76227609	216	59	57294	5.5404	1.5087e-08
ENSG00000140274	DUOXA2	15	45406519	45410619	31	16	58326	4.9882	3.0476e-07
ENSG00000140279	DUOX2	15	45384848	45406542	220	68	54184	4.8542	6.0452e-07
ENSG00000260170	RP11-96O20.4	15	45879549	45968512	780	106	60626	4.6698	1.5072e-06
ENSG00000141744	PNMT	17	37824234	37826728	17	11	57059	4.5936	2.1785e-06
				Genes with genone-wide significance (P_Bonferroni < 2.59 x 10-6) for gene based analysis are shown here.

## Sheet: ST3_Mapped genes
ensg	symbol	chr	start	end	type	entrezID	HUGO
ENSG00000144034	TPRKB	2	73956231	73964527	protein_coding	51002	TPRKB
ENSG00000144048	DUSP11	2	73989311	74007284	protein_coding	8446	DUSP11
ENSG00000187833	C2orf78	2	74011316	74044274	protein_coding	388960	C2orf78
ENSG00000138771	SHROOM3	4	77356253	77704406	protein_coding	100996628	SHROOM3
ENSG00000112499	SLC22A2	6	160592093	160698670	protein_coding	6582	SLC22A2
ENSG00000164853	UNCX	7	1272543	1276954	protein_coding	340260	UNCX
ENSG00000157168	NRG1	8	31496902	32622548	protein_coding	3084	NRG1
ENSG00000148120	C9orf3	9	97488983	97849441	protein_coding	84909	C9orf3
ENSG00000167346	MMP26	11	4726157	5013659	protein_coding	56547	MMP26
ENSG00000176895	OR51A7	11	4928600	4929538	protein_coding	119687	OR51A7
ENSG00000176879	OR51G1	11	4944531	4945637	protein_coding	79324	OR51G1
ENSG00000182070	OR52A1	11	5172239	5207612	protein_coding	23538	OR52A1
ENSG00000244734	HBB	11	5246694	5250625	protein_coding	3043	HBB
ENSG00000223609	HBD	11	5253908	5256600	protein_coding	3045	HBD
ENSG00000196565	HBG2	11	5274420	5667019	protein_coding	3048	HBG2
ENSG00000213931	HBE1	11	5289582	5526847	protein_coding	3046	HBE1
ENSG00000183251	OR51B4	11	5322244	5323226	protein_coding	79339	OR51B4
ENSG00000187918	OR51I2	11	5474638	5475707	protein_coding	390064	OR51I2
ENSG00000181609	OR52D1	11	5509915	5510979	protein_coding	390066	OR52D1
ENSG00000175520	UBQLN3	11	5528530	5531215	protein_coding	50613	UBQLN3
ENSG00000175518	UBQLNL	11	5535623	5537935	protein_coding	143630	UBQLNL
ENSG00000258588	TRIM6-TRIM34	11	5617955	5665628	protein_coding	445372	TRIM6-TRIM34
ENSG00000258659	TRIM34	11	5640994	5665628	protein_coding	53840	TRIM34
ENSG00000180919	OR56B4	11	6128914	6130065	protein_coding	196335	OR56B4
ENSG00000180913	OR56B3P	11	6149840	6150706	protein_coding	NA	OR56B3P
ENSG00000110148	CCKBR	11	6280966	6293357	protein_coding	887	CCKBR
ENSG00000162241	SLC25A45	11	65142663	65151172	protein_coding	283130	SLC25A45
ENSG00000126391	FRMD8	11	65154070	65180996	protein_coding	83786	FRMD8
ENSG00000167014	C15orf43	15	45248900	45271427	protein_coding	145645	C15orf43
ENSG00000140263	SORD	15	45315302	45369383	protein_coding	6652	SORD
ENSG00000140279	DUOX2	15	45384848	45406542	protein_coding	50506	DUOX2
ENSG00000140274	DUOXA2	15	45406519	45410619	protein_coding	405753	DUOXA2
ENSG00000140254	DUOXA1	15	45409569	45422136	protein_coding	90527	DUOXA1
ENSG00000137857	DUOX1	15	45422131	45457774	protein_coding	53905	DUOX1
ENSG00000138606	SHF	15	45459412	45493373	protein_coding	90525	SHF
ENSG00000137860	SLC28A2	15	45544428	45568149	protein_coding	9153	SLC28A2
ENSG00000171766	GATM	15	45653322	45694525	protein_coding	2628	GATM
ENSG00000171763	SPATA5L1	15	45694529	45713617	protein_coding	79029	SPATA5L1
ENSG00000166920	C15orf48	15	45722727	45740959	protein_coding	84419	C15orf48
ENSG00000104154	SLC30A4	15	45771809	45815005	protein_coding	7782	SLC30A4
ENSG00000104164	BLOC1S6	15	45879321	45908197	protein_coding	26258	BLOC1S6
ENSG00000260170	RP11-96O20.4	15	45879549	45968512	protein_coding	NA	NA
ENSG00000137767	SQRDL	15	45923346	45983492	protein_coding	58472	SQRDL
ENSG00000140367	UBE2Q2	15	76135622	76193419	protein_coding	92912	UBE2Q2
ENSG00000167196	FBXO22	15	76196200	76227609	protein_coding	26263	FBXO22
ENSG00000169752	NRG4	15	76228310	76352136	protein_coding	145957	NRG4
ENSG00000169758	C15orf27	15	76352178	76521462	protein_coding	101930395	C15orf27
ENSG00000142494	SLC47A1	17	19398698	19482347	protein_coding	55244	SLC47A1
ENSG00000141750	STAC2	17	37366789	37382125	protein_coding	342667	STAC2
ENSG00000108306	FBXL20	17	37415384	37558776	protein_coding	84961	FBXL20
ENSG00000125686	MED1	17	37560538	37607539	protein_coding	5469	MED1
ENSG00000167258	CDK12	17	37617764	37721160	protein_coding	51755	CDK12
ENSG00000131748	STARD3	17	37793318	37819737	protein_coding	10948	STARD3
ENSG00000173991	TCAP	17	37820440	37822808	protein_coding	8557	TCAP
ENSG00000141744	PNMT	17	37824234	37826728	protein_coding	5409	PNMT
ENSG00000161395	PGAP3	17	37827375	37853050	protein_coding	93210	PGAP3
ENSG00000141376	BCAS3	17	58754814	59470199	protein_coding	54828	BCAS3
ENSG00000131196	NFATC1	18	77155856	77289325	protein_coding	4772	NFATC1

## Sheet: ST4_gene enrichment analysis
Category	GeneSet	N_genes	N_overlap	p	adjP	genes	link
Curated_gene_sets	WP_17Q12_COPY_NUMBER_VARIATION_SYNDROME	90	8	2.56509e-10	1.66603e-06	STAC2:FBXL20:MED1:CDK12:STARD3:TCAP:PNMT:PGAP3	http://www.gsea-msigdb.org/gsea/msigdb/human/geneset/WP_17Q12_COPY_NUMBER_VARIATION_SYNDROME
Curated_gene_sets	NIKOLSKY_BREAST_CANCER_17Q11_Q21_AMPLICON	124	8	3.36885e-09	1.09404e-05	STAC2:FBXL20:MED1:CDK12:STARD3:TCAP:PNMT:PGAP3	http://www.gsea-msigdb.org/gsea/msigdb/human/geneset/NIKOLSKY_BREAST_CANCER_17Q11_Q21_AMPLICON
Curated_gene_sets	FARMER_BREAST_CANCER_CLUSTER_8	6	3	5.13297e-07	0.00111129	MED1:PNMT:PGAP3	http://www.gsea-msigdb.org/gsea/msigdb/human/geneset/FARMER_BREAST_CANCER_CLUSTER_8
Curated_gene_sets	REACTOME_METABOLISM_OF_AMINE_DERIVED_HORMONES	18	3	2.04122e-05	0.0331443	DUOX2:DUOX1:PNMT	http://www.gsea-msigdb.org/gsea/msigdb/human/geneset/REACTOME_METABOLISM_OF_AMINE_DERIVED_HORMONES
Canonical_Pathways	WP_17Q12_COPY_NUMBER_VARIATION_SYNDROME	90	8	2.56509e-10	7.92614e-07	STAC2:FBXL20:MED1:CDK12:STARD3:TCAP:PNMT:PGAP3	http://www.gsea-msigdb.org/gsea/msigdb/human/geneset/WP_17Q12_COPY_NUMBER_VARIATION_SYNDROME
Canonical_Pathways	REACTOME_METABOLISM_OF_AMINE_DERIVED_HORMONES	18	3	2.04122e-05	0.0315369	DUOX2:DUOX1:PNMT	http://www.gsea-msigdb.org/gsea/msigdb/human/geneset/REACTOME_METABOLISM_OF_AMINE_DERIVED_HORMONES
Reactome	REACTOME_METABOLISM_OF_AMINE_DERIVED_HORMONES	18	3	2.04122e-05	0.0337618	DUOX2:DUOX1:PNMT	http://www.gsea-msigdb.org/gsea/msigdb/human/geneset/REACTOME_METABOLISM_OF_AMINE_DERIVED_HORMONES
KEGG	KEGG_OLFACTORY_TRANSDUCTION	377	7	0.000130923	0.0243516	OR51A7:OR51G1:OR52A1:OR51B4:OR51I2:OR52D1:OR56B4	http://www.gsea-msigdb.org/gsea/msigdb/human/geneset/KEGG_OLFACTORY_TRANSDUCTION
GO_mf	GOMF_HEMOGLOBIN_ALPHA_BINDING	5	4	3.67146e-10	6.50584e-07	HBB:HBD:HBG2:HBE1	http://www.gsea-msigdb.org/gsea/msigdb/human/geneset/GOMF_HEMOGLOBIN_ALPHA_BINDING
GO_mf	GOMF_HEMOGLOBIN_BINDING	9	4	9.16961e-09	5.41618e-06	HBB:HBD:HBG2:HBE1	http://www.gsea-msigdb.org/gsea/msigdb/human/geneset/GOMF_HEMOGLOBIN_BINDING
GO_mf	GOMF_HAPTOGLOBIN_BINDING	9	4	9.16961e-09	5.41618e-06	HBB:HBD:HBG2:HBE1	http://www.gsea-msigdb.org/gsea/msigdb/human/geneset/GOMF_HAPTOGLOBIN_BINDING
GO_mf	GOMF_OXIDOREDUCTASE_ACTIVITY_ACTING_ON_PEROXIDE_AS_ACCEPTOR	56	6	1.63206e-08	7.23001e-06	HBB:HBD:HBG2:HBE1:DUOX2:DUOX1	http://www.gsea-msigdb.org/gsea/msigdb/human/geneset/GOMF_OXIDOREDUCTASE_ACTIVITY_ACTING_ON_PEROXIDE_AS_ACCEPTOR
GO_mf	GOMF_OXYGEN_CARRIER_ACTIVITY	13	4	5.15701e-08	1.82765e-05	HBB:HBD:HBG2:HBE1	http://www.gsea-msigdb.org/gsea/msigdb/human/geneset/GOMF_OXYGEN_CARRIER_ACTIVITY
GO_mf	GOMF_ANTIOXIDANT_ACTIVITY	79	6	1.32501e-07	3.9132e-05	HBB:HBD:HBG2:HBE1:DUOX2:DUOX1	http://www.gsea-msigdb.org/gsea/msigdb/human/geneset/GOMF_ANTIOXIDANT_ACTIVITY
GO_mf	GOMF_TETRAPYRROLE_BINDING	135	6	3.14694e-06	0.000796332	HBB:HBD:HBG2:HBE1:DUOX2:DUOX1	http://www.gsea-msigdb.org/gsea/msigdb/human/geneset/GOMF_TETRAPYRROLE_BINDING
GO_mf	GOMF_OXYGEN_BINDING	35	4	3.59518e-06	0.000796332	HBB:HBD:HBG2:HBE1	http://www.gsea-msigdb.org/gsea/msigdb/human/geneset/GOMF_OXYGEN_BINDING
GO_mf	GOMF_AZOLE_TRANSMEMBRANE_TRANSPORTER_ACTIVITY	12	3	5.5743e-06	0.00109752	SLC22A2:SLC28A2:SLC47A1	http://www.gsea-msigdb.org/gsea/msigdb/human/geneset/GOMF_AZOLE_TRANSMEMBRANE_TRANSPORTER_ACTIVITY
GO_mf	GOMF_MOLECULAR_CARRIER_ACTIVITY	86	4	0.000130117	0.021336	HBB:HBD:HBG2:HBE1	http://www.gsea-msigdb.org/gsea/msigdb/human/geneset/GOMF_MOLECULAR_CARRIER_ACTIVITY
GO_mf	GOMF_THIAMINE_TRANSMEMBRANE_TRANSPORTER_ACTIVITY	6	2	0.000132447	0.021336	SLC22A2:SLC47A1	http://www.gsea-msigdb.org/gsea/msigdb/human/geneset/GOMF_THIAMINE_TRANSMEMBRANE_TRANSPORTER_ACTIVITY
GO_mf	GOMF_PYRIMIDINE_NUCLEOSIDE_TRANSMEMBRANE_TRANSPORTER_ACTIVITY	7	2	0.000185067	0.0273283	SLC22A2:SLC28A2	http://www.gsea-msigdb.org/gsea/msigdb/human/geneset/GOMF_PYRIMIDINE_NUCLEOSIDE_TRANSMEMBRANE_TRANSPORTER_ACTIVITY
GO_mf	GOMF_NUCLEOSIDE_TRANSMEMBRANE_TRANSPORTER_ACTIVITY	9	2	0.000316033	0.037334	SLC22A2:SLC28A2	http://www.gsea-msigdb.org/gsea/msigdb/human/geneset/GOMF_NUCLEOSIDE_TRANSMEMBRANE_TRANSPORTER_ACTIVITY
GO_mf	GOMF_POLYAMINE_TRANSMEMBRANE_TRANSPORTER_ACTIVITY	9	2	0.000316033	0.037334	SLC22A2:SLC47A1	http://www.gsea-msigdb.org/gsea/msigdb/human/geneset/GOMF_POLYAMINE_TRANSMEMBRANE_TRANSPORTER_ACTIVITY
GO_mf	GOMF_NAD_P_H_OXIDASE_H2O2_FORMING_ACTIVITY	9	2	0.000316033	0.037334	DUOX2:DUOX1	http://www.gsea-msigdb.org/gsea/msigdb/human/geneset/GOMF_NAD_P_H_OXIDASE_H2O2_FORMING_ACTIVITY
GO_mf	GOMF_SUPEROXIDE_GENERATING_NAD_P_H_OXIDASE_ACTIVITY	10	2	0.000394278	0.0436662	DUOX2:DUOX1	http://www.gsea-msigdb.org/gsea/msigdb/human/geneset/GOMF_SUPEROXIDE_GENERATING_NAD_P_H_OXIDASE_ACTIVITY
GO_bp	GOBP_HYDROGEN_PEROXIDE_METABOLIC_PROCESS	51	8	2.30485e-12	1.78649e-08	HBB:HBD:HBG2:HBE1:DUOX2:DUOXA2:DUOXA1:DUOX1	http://www.gsea-msigdb.org/gsea/msigdb/human/geneset/GOBP_HYDROGEN_PEROXIDE_METABOLIC_PROCESS
GO_bp	GOBP_HYDROGEN_PEROXIDE_CATABOLIC_PROCESS	29	6	2.54118e-10	9.84833e-07	HBB:HBD:HBG2:HBE1:DUOX2:DUOX1	http://www.gsea-msigdb.org/gsea/msigdb/human/geneset/GOBP_HYDROGEN_PEROXIDE_CATABOLIC_PROCESS
GO_bp	GOBP_THYROID_HORMONE_GENERATION	21	5	4.03607e-09	1.04279e-05	DUOX2:DUOXA2:DUOXA1:DUOX1:MED1	http://www.gsea-msigdb.org/gsea/msigdb/human/geneset/GOBP_THYROID_HORMONE_GENERATION
GO_bp	GOBP_THYROID_HORMONE_METABOLIC_PROCESS	27	5	1.5794e-08	3.06048e-05	DUOX2:DUOXA2:DUOXA1:DUOX1:MED1	http://www.gsea-msigdb.org/gsea/msigdb/human/geneset/GOBP_THYROID_HORMONE_METABOLIC_PROCESS
GO_bp	GOBP_CARBON_DIOXIDE_TRANSPORT	13	4	5.15701e-08	7.9944e-05	HBB:HBD:HBG2:HBE1	http://www.gsea-msigdb.org/gsea/msigdb/human/geneset/GOBP_CARBON_DIOXIDE_TRANSPORT
GO_bp	GOBP_DETOXIFICATION	124	7	8.71268e-08	9.49618e-05	HBB:HBD:HBG2:HBE1:DUOX2:DUOX1:SLC47A1	http://www.gsea-msigdb.org/gsea/msigdb/human/geneset/GOBP_DETOXIFICATION
GO_bp	GOBP_OXYGEN_TRANSPORT	15	4	9.80124e-08	9.49618e-05	HBB:HBD:HBG2:HBE1	http://www.gsea-msigdb.org/gsea/msigdb/human/geneset/GOBP_OXYGEN_TRANSPORT
GO_bp	GOBP_HYDROGEN_PEROXIDE_BIOSYNTHETIC_PROCESS	15	4	9.80124e-08	9.49618e-05	DUOX2:DUOXA2:DUOXA1:DUOX1	http://www.gsea-msigdb.org/gsea/msigdb/human/geneset/GOBP_HYDROGEN_PEROXIDE_BIOSYNTHETIC_PROCESS
GO_bp	GOBP_RESPONSE_TO_TOXIC_SUBSTANCE	217	8	2.64331e-07	0.000204883	HBB:HBD:HBG2:HBE1:DUOX2:DUOX1:SLC30A4:SLC47A1	http://www.gsea-msigdb.org/gsea/msigdb/human/geneset/GOBP_RESPONSE_TO_TOXIC_SUBSTANCE
GO_bp	GOBP_REACTIVE_OXYGEN_SPECIES_METABOLIC_PROCESS	217	8	2.64331e-07	0.000204883	HBB:HBD:HBG2:HBE1:DUOX2:DUOXA2:DUOXA1:DUOX1	http://www.gsea-msigdb.org/gsea/msigdb/human/geneset/GOBP_REACTIVE_OXYGEN_SPECIES_METABOLIC_PROCESS
GO_bp	GOBP_CELLULAR_OXIDANT_DETOXIFICATION	92	6	3.29869e-07	0.000232438	HBB:HBD:HBG2:HBE1:DUOX2:DUOX1	http://www.gsea-msigdb.org/gsea/msigdb/human/geneset/GOBP_CELLULAR_OXIDANT_DETOXIFICATION
GO_bp	GOBP_GAS_TRANSPORT	21	4	4.24016e-07	0.000273879	HBB:HBD:HBG2:HBE1	http://www.gsea-msigdb.org/gsea/msigdb/human/geneset/GOBP_GAS_TRANSPORT
GO_bp	GOBP_PHENOL_CONTAINING_COMPOUND_METABOLIC_PROCESS	105	6	7.225e-07	0.000430777	DUOX2:DUOXA2:DUOXA1:DUOX1:MED1:PNMT	http://www.gsea-msigdb.org/gsea/msigdb/human/geneset/GOBP_PHENOL_CONTAINING_COMPOUND_METABOLIC_PROCESS
GO_bp	GOBP_CELLULAR_MODIFIED_AMINO_ACID_METABOLIC_PROCESS	115	6	1.2344e-06	0.000671097	DUOX2:DUOXA2:DUOXA1:DUOX1:GATM:MED1	http://www.gsea-msigdb.org/gsea/msigdb/human/geneset/GOBP_CELLULAR_MODIFIED_AMINO_ACID_METABOLIC_PROCESS
GO_bp	GOBP_CELLULAR_RESPONSE_TO_TOXIC_SUBSTANCE	116	6	1.29873e-06	0.000671097	HBB:HBD:HBG2:HBE1:DUOX2:DUOX1	http://www.gsea-msigdb.org/gsea/msigdb/human/geneset/GOBP_CELLULAR_RESPONSE_TO_TOXIC_SUBSTANCE
GO_bp	GOBP_AZOLE_TRANSMEMBRANE_TRANSPORT	13	3	7.23112e-06	0.00350302	SLC22A2:SLC28A2:SLC47A1	http://www.gsea-msigdb.org/gsea/msigdb/human/geneset/GOBP_AZOLE_TRANSMEMBRANE_TRANSPORT
GO_bp	GOBP_PYRIMIDINE_CONTAINING_COMPOUND_TRANSMEMBRANE_TRANSPORT	14	3	9.1836e-06	0.00418718	SLC22A2:SLC28A2:SLC47A1	http://www.gsea-msigdb.org/gsea/msigdb/human/geneset/GOBP_PYRIMIDINE_CONTAINING_COMPOUND_TRANSMEMBRANE_TRANSPORT
GO_bp	GOBP_ONE_CARBON_COMPOUND_TRANSPORT	50	4	1.52917e-05	0.00658479	HBB:HBD:HBG2:HBE1	http://www.gsea-msigdb.org/gsea/msigdb/human/geneset/GOBP_ONE_CARBON_COMPOUND_TRANSPORT
GO_bp	GOBP_REACTIVE_OXYGEN_SPECIES_BIOSYNTHETIC_PROCESS	52	4	1.78958e-05	0.00730055	DUOX2:DUOXA2:DUOXA1:DUOX1	http://www.gsea-msigdb.org/gsea/msigdb/human/geneset/GOBP_REACTIVE_OXYGEN_SPECIES_BIOSYNTHETIC_PROCESS
GO_bp	GOBP_HORMONE_BIOSYNTHETIC_PROCESS	64	4	4.089e-05	0.0158469	DUOX2:DUOX1:MED1:STARD3	http://www.gsea-msigdb.org/gsea/msigdb/human/geneset/GOBP_HORMONE_BIOSYNTHETIC_PROCESS
GO_bp	GOBP_POSITIVE_REGULATION_OF_HYDROGEN_PEROXIDE_METABOLIC_PROCESS	4	2	5.31843e-05	0.0196301	DUOXA2:DUOXA1	http://www.gsea-msigdb.org/gsea/msigdb/human/geneset/GOBP_POSITIVE_REGULATION_OF_HYDROGEN_PEROXIDE_METABOLIC_PROCESS
GO_bp	GOBP_HORMONE_METABOLIC_PROCESS	229	6	6.32453e-05	0.0222825	DUOX2:DUOXA2:DUOXA1:DUOX1:MED1:STARD3	http://www.gsea-msigdb.org/gsea/msigdb/human/geneset/GOBP_HORMONE_METABOLIC_PROCESS
GO_bp	GOBP_REGULATION_OF_HYDROGEN_PEROXIDE_BIOSYNTHETIC_PROCESS	6	2	0.000132447	0.0410639	DUOXA2:DUOXA1	http://www.gsea-msigdb.org/gsea/msigdb/human/geneset/GOBP_REGULATION_OF_HYDROGEN_PEROXIDE_BIOSYNTHETIC_PROCESS
GO_bp	GOBP_ERBB4_ERBB4_SIGNALING_PATHWAY	6	2	0.000132447	0.0410639	NRG1:NRG4	http://www.gsea-msigdb.org/gsea/msigdb/human/geneset/GOBP_ERBB4_ERBB4_SIGNALING_PATHWAY
GO_bp	GOBP_REGULATION_OF_THYROID_HORMONE_GENERATION	6	2	0.000132447	0.0410639	DUOXA2:DUOXA1	http://www.gsea-msigdb.org/gsea/msigdb/human/geneset/GOBP_REGULATION_OF_THYROID_HORMONE_GENERATION
GO_bp	GOBP_ORGANIC_HYDROXY_COMPOUND_METABOLIC_PROCESS	519	8	0.000152013	0.0453175	SORD:DUOX2:DUOXA2:DUOXA1:DUOX1:MED1:STARD3:PNMT	http://www.gsea-msigdb.org/gsea/msigdb/human/geneset/GOBP_ORGANIC_HYDROXY_COMPOUND_METABOLIC_PROCESS
GO_bp	GOBP_SENSORY_PERCEPTION_OF_SMELL	394	7	0.000171818	0.0493245	OR51A7:OR51G1:OR52A1:OR51B4:OR51I2:OR52D1:OR56B4	http://www.gsea-msigdb.org/gsea/msigdb/human/geneset/GOBP_SENSORY_PERCEPTION_OF_SMELL
GO_bp	GOBP_THIAMINE_TRANSPORT	7	2	0.000185067	0.049464	SLC22A2:SLC47A1	http://www.gsea-msigdb.org/gsea/msigdb/human/geneset/GOBP_THIAMINE_TRANSPORT
GO_bp	GOBP_L_ARGININE_IMPORT_ACROSS_PLASMA_MEMBRANE	7	2	0.000185067	0.049464	SLC22A2:SLC47A1	http://www.gsea-msigdb.org/gsea/msigdb/human/geneset/GOBP_L_ARGININE_IMPORT_ACROSS_PLASMA_MEMBRANE
Wikipathways	WP_17Q12_COPY_NUMBER_VARIATION_SYNDROME	90	8	2.56509e-10	1.88021e-07	STAC2:FBXL20:MED1:CDK12:STARD3:TCAP:PNMT:PGAP3	http://www.gsea-msigdb.org/gsea/msigdb/human/geneset/WP_17Q12_COPY_NUMBER_VARIATION_SYNDROME
GO_cc	GOCC_HAPTOGLOBIN_HEMOGLOBIN_COMPLEX	10	4	1.52485e-08	1.20618e-05	HBB:HBD:HBG2:HBE1	http://www.gsea-msigdb.org/gsea/msigdb/human/geneset/GOCC_HAPTOGLOBIN_HEMOGLOBIN_COMPLEX
GO_cc	GOCC_HEMOGLOBIN_COMPLEX	11	4	2.39084e-08	1.20618e-05	HBB:HBD:HBG2:HBE1	http://www.gsea-msigdb.org/gsea/msigdb/human/geneset/GOCC_HEMOGLOBIN_COMPLEX

## Sheet: ST5_GWAS catalog genes
Category	GeneSet	N_genes	N_overlap	p	adjP	genes
GWAScatalog	Malaria	267	18	4.8878e-20	2.16285e-16	NRG1,MMP26,OR51A7,OR51G1,OR52A1,HBB,HBD,HBG2,HBE1,OR51B4,OR51I2,OR52D1,UBQLN3,UBQLNL,TRIM6-TRIM34,TRIM34,OR56B4,CCKBR
GWAScatalog	Creatinine levels	103	13	3.2563e-18	7.20456e-15	TPRKB,DUSP11,SLC22A2,UNCX,SLC25A45,GATM,SPATA5L1,FBXO22,SLC47A1,FBXL20,MED1,BCAS3,NFATC1
GWAScatalog	Estimated glomerular filtration rate in diabetes	20	8	4.89634e-16	7.2221e-13	TPRKB,SLC22A2,UNCX,HBB,GATM,UBE2Q2,BCAS3,NFATC1
GWAScatalog	Glomerular filtration rate (creatinine)	72	9	7.6035e-13	8.41137e-10	SLC22A2,UNCX,GATM,UBE2Q2,SLC47A1,FBXL20,CDK12,BCAS3,NFATC1
GWAScatalog	Glomerular filtration rate	87	9	4.42795e-12	3.91874e-09	SLC22A2,UNCX,GATM,SPATA5L1,UBE2Q2,MED1,CDK12,BCAS3,NFATC1
GWAScatalog	Glomerular filtration rate in non diabetics (creatinine)	34	7	7.66532e-12	5.65317e-09	SLC22A2,GATM,UBE2Q2,SLC47A1,CDK12,BCAS3,NFATC1
GWAScatalog	Estimated glomerular filtration rate	458	14	5.56345e-11	3.5169e-08	SLC22A2,UNCX,NRG1,HBB,SLC28A2,GATM,SPATA5L1,UBE2Q2,NRG4,SLC47A1,MED1,CDK12,BCAS3,NFATC1
GWAScatalog	Estimated glomerular filtration rate in non-diabetics	76	8	6.44387e-11	3.56426e-08	SLC22A2,UNCX,HBB,NRG4,SLC47A1,FBXL20,BCAS3,NFATC1
GWAScatalog	Chronic kidney disease	118	8	2.26966e-09	1.11591e-06	SLC22A2,UNCX,GATM,SPATA5L1,UBE2Q2,SLC47A1,BCAS3,NFATC1
GWAScatalog	Pancreatic ductal adenocarcinoma	15	4	9.80124e-08	4.33705e-05	STARD3,TCAP,PNMT,PGAP3
GWAScatalog	Logical memory (delayed recall) in normal cognition	41	5	1.41994e-07	5.71201e-05	HBB,HBD,HBG2,HBE1,OR51B4
GWAScatalog	Urate levels	234	8	4.69176e-07	0.000173009	UNCX,NRG1,HBB,FRMD8,UBE2Q2,NRG4,SLC47A1,BCAS3
GWAScatalog	Beta thalassemia/hemoglobin E disease	6	3	5.13297e-07	0.000174718	HBD,HBG2,HBE1
GWAScatalog	Logical memory (immediate recall) in normal cognition	24	4	7.47779e-07	0.000236352	HBB,HBD,HBG2,HBE1
GWAScatalog	Hemoglobin levels	304	8	3.33153e-06	0.000982802	HBB,HBD,HBG2,HBE1,UBE2Q2,FBXL20,STARD3,BCAS3
GWAScatalog	Serum metabolite levels	322	8	5.09007e-06	0.00140772	TPRKB,DUSP11,SLC22A2,SLC25A45,GATM,SPATA5L1,C15orf48,FBXL20
GWAScatalog	Hematology traits	17	3	1.70466e-05	0.00443712	HBB,HBD,HBE1
GWAScatalog	Mean corpuscular hemoglobin concentration	191	6	2.29348e-05	0.00563813	HBB,HBD,HBG2,HBE1,TRIM6-TRIM34,TRIM34
GWAScatalog	Renal function and chronic kidney disease	3	2	2.66437e-05	0.00620518	GATM,SPATA5L1
GWAScatalog	Blood urea nitrogen levels	123	5	3.39485e-05	0.0075111	UNCX,NRG4,CDK12,BCAS3,NFATC1
GWAScatalog	Serum creatinine levels	4	2	5.31843e-05	0.0112067	BCAS3,NFATC1
GWAScatalog	Renal function-related traits (sCR)	7	2	0.000185067	0.0372237	UNCX,BCAS3
GWAScatalog	Ulcerative colitis	286	6	0.000213268	0.041031	STAC2,FBXL20,MED1,STARD3,TCAP,PNMT
GWAScatalog	Urinary albumin-to-creatinine ratio	99	4	0.000224068	0.0413126	HBB,GATM,SPATA5L1,FBXL20
GWAScatalog	Renal function-related traits (eGRFcrea)	8	2	0.000246279	0.0435914	UNCX,BCAS3
GWAScatalog	Urate levels in obese individuals	43	3	0.000292677	0.0498113	UBE2Q2,FBXO22,NRG4
