# Supplementary material for: KidneyGenAfrica: A multi-cohort Genome-wide association study and polygenic prediction of kidney function in 110,000 continental and diasporan Africans
Source: Research Square preprint supplement (doi:10.21203/rs.3.rs-5555692/v1), 2024-12-19
Supplement: Supplementary file 3 [file 54c4a110e7cc298ebab2c26c.xlsx]

## Sheet: IndexPositions
SNP	CHR	POS	A1	A2	FRQ	BETA	SE	N	P	Z
11:6293717	11	6293717	A	G	0.018	-0.110662649471935	0.019935624116724	71144	2.848e-08	-5.551
11:5207604	11	5207604	A	ACTT	0.0383	-0.0893102927115607	0.0153824134880401	57336	6.391e-09	-5.806
11:65144075	11	65144075	T	C	0.0903	0.0567545092334036	0.00870601460859082	80263	7.073e-11	6.519
12:17157119	12	17157119	T	C	0.0112	-0.163549015350611	0.0280530043483038	57336	5.54e-09	-5.83
15:46139843	15	46139843	T	C	0.7451	-0.0300531747163216	0.00549619142580863	87119	4.545e-08	-5.468
15:45221609	15	45221609	T	C	0.8295	-0.0323194701655834	0.00591931688014348	100869	4.751e-08	-5.46
15:76213980	15	76213980	T	C	0.0789	0.04862298253313	0.00891837537291453	86470	4.983e-08	5.452
17:59456589	17	59456589	T	C	0.5112	0.0295892391232134	0.00470118193886454	90499	3.096e-10	6.294
17:37734482	17	37734482	T	C	0.2695	0.0306741463330972	0.00562415590999215	80263	4.912e-08	5.454
17:19472894	17	19472894	A	G	0.9402	0.0581895618541675	0.0101393207621829	86470	9.525e-09	5.739
18:77156537	18	77156537	C	G	0.8136	0.0349809314277588	0.00640793761270541	80263	4.787e-08	5.459
2:73964631	2	73964631	T	C	0.4943	-0.0252248363224101	0.00454829360303104	96661	2.922e-08	-5.546
21:45412872	21	45412872	T	C	0.0172	-0.137045138086583	0.0215683251631387	63543	2.097e-10	-6.354
4:77410318	4	77410318	A	C	0.1569	-0.0322636936298377	0.00586719287685718	109771	3.81e-08	-5.499
6:131821303	6	131821303	T	C	0.4636	-0.0277828816311803	0.00500412133126447	80263	2.83e-08	-5.552
6:160674632	6	160674632	A	G	0.1147	-0.0436648880743319	0.00793330088559809	78206	3.714e-08	-5.504
7:1286192	7	1286192	C	G	0.2975	-0.0296236146769338	0.00523940832630594	87119	1.564e-08	-5.654
8:32410110	8	32410110	A	G	0.6301	0.0252804556734447	0.00456490712774372	102916	3.068e-08	5.538
9:97751621	9	97751621	A	T	0.4294	0.0276519432854497	0.00504137525714671	80263	4.144e-08	5.485

## Sheet: Datasets
ExpressionContext	Study					qtl_group	ftp_path
Adipose_Subcutaneous	GTEx					Adipose_Subcutaneous	http://ftp.ebi.ac.uk/pub/databases/spot/eQTL/imported/GTEx_V8/ge/Adipose_Subcutaneous.tsv.gz
Adipose_Visceral_Omentum	GTEx					Adipose_Visceral_Omentum	http://ftp.ebi.ac.uk/pub/databases/spot/eQTL/imported/GTEx_V8/ge/Adipose_Visceral_Omentum.tsv.gz
Adrenal_Gland	GTEx					Adrenal_Gland	http://ftp.ebi.ac.uk/pub/databases/spot/eQTL/imported/GTEx_V8/ge/Adrenal_Gland.tsv.gz
Artery_Aorta	GTEx					Artery_Aorta	http://ftp.ebi.ac.uk/pub/databases/spot/eQTL/imported/GTEx_V8/ge/Artery_Aorta.tsv.gz
Artery_Coronary	GTEx					Artery_Coronary	http://ftp.ebi.ac.uk/pub/databases/spot/eQTL/imported/GTEx_V8/ge/Artery_Coronary.tsv.gz
Artery_Tibial	GTEx					Artery_Tibial	http://ftp.ebi.ac.uk/pub/databases/spot/eQTL/imported/GTEx_V8/ge/Artery_Tibial.tsv.gz
Brain_Amygdala	GTEx					Brain_Amygdala	http://ftp.ebi.ac.uk/pub/databases/spot/eQTL/imported/GTEx_V8/ge/Brain_Amygdala.tsv.gz
Brain_Anterior_cingulate_cortex_BA24	GTEx					Brain_Anterior_cingulate_cortex_BA24	http://ftp.ebi.ac.uk/pub/databases/spot/eQTL/imported/GTEx_V8/ge/Brain_Anterior_cingulate_cortex_BA24.tsv.gz
Brain_Caudate_basal_ganglia	GTEx					Brain_Caudate_basal_ganglia	http://ftp.ebi.ac.uk/pub/databases/spot/eQTL/imported/GTEx_V8/ge/Brain_Caudate_basal_ganglia.tsv.gz
Brain_Cerebellar_Hemisphere	GTEx					Brain_Cerebellar_Hemisphere	http://ftp.ebi.ac.uk/pub/databases/spot/eQTL/imported/GTEx_V8/ge/Brain_Cerebellar_Hemisphere.tsv.gz
Brain_Cerebellum	GTEx					Brain_Cerebellum	http://ftp.ebi.ac.uk/pub/databases/spot/eQTL/imported/GTEx_V8/ge/Brain_Cerebellum.tsv.gz
Brain_Cortex	GTEx					Brain_Cortex	http://ftp.ebi.ac.uk/pub/databases/spot/eQTL/imported/GTEx_V8/ge/Brain_Cortex.tsv.gz
Brain_Frontal_Cortex_BA9	GTEx					Brain_Frontal_Cortex_BA9	http://ftp.ebi.ac.uk/pub/databases/spot/eQTL/imported/GTEx_V8/ge/Brain_Frontal_Cortex_BA9.tsv.gz
Brain_Hippocampus	GTEx					Brain_Hippocampus	http://ftp.ebi.ac.uk/pub/databases/spot/eQTL/imported/GTEx_V8/ge/Brain_Hippocampus.tsv.gz
Brain_Hypothalamus	GTEx					Brain_Hypothalamus	http://ftp.ebi.ac.uk/pub/databases/spot/eQTL/imported/GTEx_V8/ge/Brain_Hypothalamus.tsv.gz
Brain_Nucleus_accumbens_basal_ganglia	GTEx					Brain_Nucleus_accumbens_basal_ganglia	http://ftp.ebi.ac.uk/pub/databases/spot/eQTL/imported/GTEx_V8/ge/Brain_Nucleus_accumbens_basal_ganglia.tsv.gz
Brain_Putamen_basal_ganglia	GTEx					Brain_Putamen_basal_ganglia	http://ftp.ebi.ac.uk/pub/databases/spot/eQTL/imported/GTEx_V8/ge/Brain_Putamen_basal_ganglia.tsv.gz
Brain_Spinal_cord_cervical_c-1	GTEx					Brain_Spinal_cord_cervical_c-1	http://ftp.ebi.ac.uk/pub/databases/spot/eQTL/imported/GTEx_V8/ge/Brain_Spinal_cord_cervical_c-1.tsv.gz
Brain_Substantia_nigra	GTEx					Brain_Substantia_nigra	http://ftp.ebi.ac.uk/pub/databases/spot/eQTL/imported/GTEx_V8/ge/Brain_Substantia_nigra.tsv.gz
Breast_Mammary_Tissue	GTEx					Breast_Mammary_Tissue	http://ftp.ebi.ac.uk/pub/databases/spot/eQTL/imported/GTEx_V8/ge/Breast_Mammary_Tissue.tsv.gz
Cells_Cultured_fibroblasts	GTEx					Cells_Cultured_fibroblasts	http://ftp.ebi.ac.uk/pub/databases/spot/eQTL/imported/GTEx_V8/ge/Cells_Cultured_fibroblasts.tsv.gz
Cells_EBV-transformed_lymphocytes	GTEx					Cells_EBV-transformed_lymphocytes	http://ftp.ebi.ac.uk/pub/databases/spot/eQTL/imported/GTEx_V8/ge/Cells_EBV-transformed_lymphocytes.tsv.gz
Colon_Sigmoid	GTEx					Colon_Sigmoid	http://ftp.ebi.ac.uk/pub/databases/spot/eQTL/imported/GTEx_V8/ge/Colon_Sigmoid.tsv.gz
Colon_Transverse	GTEx					Colon_Transverse	http://ftp.ebi.ac.uk/pub/databases/spot/eQTL/imported/GTEx_V8/ge/Colon_Transverse.tsv.gz
Esophagus_Gastroesophageal_Junction	GTEx					Esophagus_Gastroesophageal_Junction	http://ftp.ebi.ac.uk/pub/databases/spot/eQTL/imported/GTEx_V8/ge/Esophagus_Gastroesophageal_Junction.tsv.gz
Esophagus_Mucosa	GTEx					Esophagus_Mucosa	http://ftp.ebi.ac.uk/pub/databases/spot/eQTL/imported/GTEx_V8/ge/Esophagus_Mucosa.tsv.gz
Esophagus_Muscularis	GTEx					Esophagus_Muscularis	http://ftp.ebi.ac.uk/pub/databases/spot/eQTL/imported/GTEx_V8/ge/Esophagus_Muscularis.tsv.gz
Heart_Atrial_Appendage	GTEx					Heart_Atrial_Appendage	http://ftp.ebi.ac.uk/pub/databases/spot/eQTL/imported/GTEx_V8/ge/Heart_Atrial_Appendage.tsv.gz
Heart_Left_Ventricle	GTEx					Heart_Left_Ventricle	http://ftp.ebi.ac.uk/pub/databases/spot/eQTL/imported/GTEx_V8/ge/Heart_Left_Ventricle.tsv.gz
Kidney_Cortex	GTEx					Kidney_Cortex	http://ftp.ebi.ac.uk/pub/databases/spot/eQTL/imported/GTEx_V8/ge/Kidney_Cortex.tsv.gz
Liver	GTEx					Liver	http://ftp.ebi.ac.uk/pub/databases/spot/eQTL/imported/GTEx_V8/ge/Liver.tsv.gz
Lung	GTEx					Lung	http://ftp.ebi.ac.uk/pub/databases/spot/eQTL/imported/GTEx_V8/ge/Lung.tsv.gz
Minor_Salivary_Gland	GTEx					Minor_Salivary_Gland	http://ftp.ebi.ac.uk/pub/databases/spot/eQTL/imported/GTEx_V8/ge/Minor_Salivary_Gland.tsv.gz
Muscle_Skeletal	GTEx					Muscle_Skeletal	http://ftp.ebi.ac.uk/pub/databases/spot/eQTL/imported/GTEx_V8/ge/Muscle_Skeletal.tsv.gz
Nerve_Tibial	GTEx					Nerve_Tibial	http://ftp.ebi.ac.uk/pub/databases/spot/eQTL/imported/GTEx_V8/ge/Nerve_Tibial.tsv.gz
Ovary	GTEx					Ovary	http://ftp.ebi.ac.uk/pub/databases/spot/eQTL/imported/GTEx_V8/ge/Ovary.tsv.gz
Pancreas	GTEx					Pancreas	http://ftp.ebi.ac.uk/pub/databases/spot/eQTL/imported/GTEx_V8/ge/Pancreas.tsv.gz
Pituitary	GTEx					Pituitary	http://ftp.ebi.ac.uk/pub/databases/spot/eQTL/imported/GTEx_V8/ge/Pituitary.tsv.gz
Prostate	GTEx					Prostate	http://ftp.ebi.ac.uk/pub/databases/spot/eQTL/imported/GTEx_V8/ge/Prostate.tsv.gz
Skin_Not_Sun_Exposed_Suprapubic	GTEx					Skin_Not_Sun_Exposed_Suprapubic	http://ftp.ebi.ac.uk/pub/databases/spot/eQTL/imported/GTEx_V8/ge/Skin_Not_Sun_Exposed_Suprapubic.tsv.gz
Skin_Sun_Exposed_Lower_leg	GTEx					Skin_Sun_Exposed_Lower_leg	http://ftp.ebi.ac.uk/pub/databases/spot/eQTL/imported/GTEx_V8/ge/Skin_Sun_Exposed_Lower_leg.tsv.gz
Small_Intestine_Terminal_Ileum	GTEx					Small_Intestine_Terminal_Ileum	http://ftp.ebi.ac.uk/pub/databases/spot/eQTL/imported/GTEx_V8/ge/Small_Intestine_Terminal_Ileum.tsv.gz
Spleen	GTEx					Spleen	http://ftp.ebi.ac.uk/pub/databases/spot/eQTL/imported/GTEx_V8/ge/Spleen.tsv.gz
Stomach	GTEx					Stomach	http://ftp.ebi.ac.uk/pub/databases/spot/eQTL/imported/GTEx_V8/ge/Stomach.tsv.gz
Testis	GTEx					Testis	http://ftp.ebi.ac.uk/pub/databases/spot/eQTL/imported/GTEx_V8/ge/Testis.tsv.gz
Thyroid	GTEx					Thyroid	http://ftp.ebi.ac.uk/pub/databases/spot/eQTL/imported/GTEx_V8/ge/Thyroid.tsv.gz
Uterus	GTEx					Uterus	http://ftp.ebi.ac.uk/pub/databases/spot/eQTL/imported/GTEx_V8/ge/Uterus.tsv.gz
Vagina	GTEx					Vagina	http://ftp.ebi.ac.uk/pub/databases/spot/eQTL/imported/GTEx_V8/ge/Vagina.tsv.gz
Whole_Blood	GTEx					Whole_Blood	http://ftp.ebi.ac.uk/pub/databases/spot/eQTL/imported/GTEx_V8/ge/Whole_Blood.tsv.gz
TGP_Cell_lines	MAGEV01					TGP_Cell_lines	eQTL_FastQTL_results.nominal_pass.allAssociations.MAGE.v0.1.txt.gz
Glom.NephQTL2	NephQTL2					Glom.NephQTL2	https://www.dropbox.com/s/tvu9li7r98gg4qd/MatrixEQTL_Results_Kyu_et_al_2023.zip?dl=0
Tube.NephQTL2	NephQTL2					Tube.NephQTL2	https://www.dropbox.com/s/tvu9li7r98gg4qd/MatrixEQTL_Results_Kyu_et_al_2023.zip?dl=0

## Sheet: HighPP4
nsnps	Locus	Trait	Tissue	PP.H4.abf	gene_id	hgnc_symbol	wikigene_description
4320	18_76656537_77656537	All_African_meta-analysis	Muscle_Skeletal	0.99946	ENSG00000131196	NFATC1	nuclear factor of activated T cells 1
4320	18_76656537_77656537	All_African_meta-analysis	Pancreas	0.999265	ENSG00000131196	NFATC1	nuclear factor of activated T cells 1
4320	18_76656537_77656537	All_African_meta-analysis	Heart_Left_Ventricle	0.998536	ENSG00000131196	NFATC1	nuclear factor of activated T cells 1
4320	18_76656537_77656537	All_African_meta-analysis	Breast_Mammary_Tissue	0.997655	ENSG00000131196	NFATC1	nuclear factor of activated T cells 1
4320	18_76656537_77656537	All_African_meta-analysis	Testis	0.996996	ENSG00000131196	NFATC1	nuclear factor of activated T cells 1
3242	15_44721609_45721609	All_African_meta-analysis	Muscle_Skeletal	0.993528	ENSG00000171766	GATM	glycine amidinotransferase
3382	15_45639843_46639843	All_African_meta-analysis	Muscle_Skeletal	0.993525	ENSG00000171766	GATM	glycine amidinotransferase
4320	18_76656537_77656537	All_African_meta-analysis	Adipose_Subcutaneous	0.986034	ENSG00000131196	NFATC1	nuclear factor of activated T cells 1
2321	15_45639843_46639843	All_African_meta-analysis	Muscle_Skeletal	0.978841	ENSG00000140263	SORD	sorbitol dehydrogenase
3382	15_45639843_46639843	All_African_meta-analysis	Testis	0.977543	ENSG00000171763	AFG2B	AFG2 AAA ATPase homolog B
2163	17_18972894_19972894	All_African_meta-analysis	Liver	0.974948	ENSG00000142494	SLC47A1	solute carrier family 47 member 1
3242	15_44721609_45721609	All_African_meta-analysis	Testis	0.971748	ENSG00000171763	AFG2B	AFG2 AAA ATPase homolog B
4921	4_76910318_77910318	All_African_meta-analysis	Tube.NephQTL2	0.967093	ENSG00000138771	SHROOM3	shroom family member 3
3382	15_45639843_46639843	All_African_meta-analysis	Brain_Nucleus_accumbens_basal_ganglia	0.96675	ENSG00000171763	AFG2B	AFG2 AAA ATPase homolog B
3382	15_45639843_46639843	All_African_meta-analysis	Heart_Atrial_Appendage	0.96569	ENSG00000171766	GATM	glycine amidinotransferase
3056	15_45639843_46639843	All_African_meta-analysis	Lung	0.965536	ENSG00000137860	SLC28A2	solute carrier family 28 member 2
3241	15_44721609_45721609	All_African_meta-analysis	Brain_Nucleus_accumbens_basal_ganglia	0.961842	ENSG00000171763	AFG2B	AFG2 AAA ATPase homolog B
3242	15_44721609_45721609	All_African_meta-analysis	Heart_Atrial_Appendage	0.956603	ENSG00000171766	GATM	glycine amidinotransferase
3370	15_45639843_46639843	All_African_meta-analysis	Brain_Substantia_nigra	0.955967	ENSG00000171763	AFG2B	AFG2 AAA ATPase homolog B
2613	15_45639843_46639843	All_African_meta-analysis	Skin_Not_Sun_Exposed_Suprapubic	0.950727	ENSG00000140274	DUOXA2	dual oxidase maturation factor 2
2649	2_73464631_74464631	All_African_meta-analysis	Colon_Transverse	0.948293	ENSG00000163013	FBXO41	F-box protein 41
3224	15_44721609_45721609	All_African_meta-analysis	Brain_Substantia_nigra	0.944038	ENSG00000171763	AFG2B	AFG2 AAA ATPase homolog B
3242	15_44721609_45721609	All_African_meta-analysis	Lung	0.940148	ENSG00000137860	SLC28A2	solute carrier family 28 member 2
4320	18_76656537_77656537	All_African_meta-analysis	Stomach	0.939996	ENSG00000131196	NFATC1	nuclear factor of activated T cells 1
3381	15_45639843_46639843	All_African_meta-analysis	Brain_Caudate_basal_ganglia	0.93861	ENSG00000171763	AFG2B	AFG2 AAA ATPase homolog B
2649	2_73464631_74464631	All_African_meta-analysis	Thyroid	0.938331	ENSG00000273245
3302	15_45639843_46639843	All_African_meta-analysis	Brain_Spinal_cord_cervical_c-1	0.934025	ENSG00000171763	AFG2B	AFG2 AAA ATPase homolog B
3375	15_45639843_46639843	All_African_meta-analysis	Brain_Anterior_cingulate_cortex_BA24	0.92818	ENSG00000171763	AFG2B	AFG2 AAA ATPase homolog B
3174	15_44721609_45721609	All_African_meta-analysis	Brain_Anterior_cingulate_cortex_BA24	0.916501	ENSG00000171763	AFG2B	AFG2 AAA ATPase homolog B
3382	15_45639843_46639843	All_African_meta-analysis	Brain_Putamen_basal_ganglia	0.913579	ENSG00000171763	AFG2B	AFG2 AAA ATPase homolog B
3380	15_45639843_46639843	All_African_meta-analysis	Brain_Frontal_Cortex_BA9	0.912712	ENSG00000171763	AFG2B	AFG2 AAA ATPase homolog B
2912	17_37234482_38234482	All_African_meta-analysis	Skin_Sun_Exposed_Lower_leg	0.910994	ENSG00000108306	FBXL20	F-box and leucine rich repeat protein 20
2649	2_73464631_74464631	All_African_meta-analysis	Esophagus_Mucosa	0.909558	ENSG00000273245
2649	2_73464631_74464631	All_African_meta-analysis	Whole_Blood	0.90805	ENSG00000273245
2600	2_73464631_74464631	All_African_meta-analysis	Kidney_Cortex	0.907623	ENSG00000204872	NAT8B
2166	17_18972894_19972894	All_African_meta-analysis	Skin_Sun_Exposed_Lower_leg	0.907592	ENSG00000166484	MAPK7	mitogen-activated protein kinase 7
3224	15_44721609_45721609	All_African_meta-analysis	Brain_Spinal_cord_cervical_c-1	0.903339	ENSG00000171763	AFG2B	AFG2 AAA ATPase homolog B
3242	15_44721609_45721609	All_African_meta-analysis	Brain_Caudate_basal_ganglia	0.902808	ENSG00000171763	AFG2B	AFG2 AAA ATPase homolog B
3382	15_45639843_46639843	All_African_meta-analysis	Colon_Sigmoid	0.901451	ENSG00000171766	GATM	glycine amidinotransferase
2912	17_37234482_38234482	All_African_meta-analysis	Esophagus_Muscularis	0.898195	ENSG00000173991	TCAP	titin-cap
3240	15_44721609_45721609	All_African_meta-analysis	Brain_Putamen_basal_ganglia	0.892833	ENSG00000171763	AFG2B	AFG2 AAA ATPase homolog B
2649	2_73464631_74464631	All_African_meta-analysis	Esophagus_Muscularis	0.89233	ENSG00000144034	TPRKB	TP53RK binding protein
2649	2_73464631_74464631	All_African_meta-analysis	Skin_Sun_Exposed_Lower_leg	0.890838	ENSG00000273245
3382	15_45639843_46639843	All_African_meta-analysis	Nerve_Tibial	0.887882	ENSG00000104154	SLC30A4	solute carrier family 30 member 4
2647	2_73464631_74464631	All_African_meta-analysis	Brain_Cerebellar_Hemisphere	0.881032	ENSG00000144048	DUSP11	dual specificity phosphatase 11
3242	15_44721609_45721609	All_African_meta-analysis	Colon_Sigmoid	0.877757	ENSG00000171766	GATM	glycine amidinotransferase
3238	15_44721609_45721609	All_African_meta-analysis	Brain_Frontal_Cortex_BA9	0.876416	ENSG00000171763	AFG2B	AFG2 AAA ATPase homolog B
4318	18_76656537_77656537	All_African_meta-analysis	Brain_Putamen_basal_ganglia	0.874628	ENSG00000131196	NFATC1	nuclear factor of activated T cells 1
2649	2_73464631_74464631	All_African_meta-analysis	Nerve_Tibial	0.864797	ENSG00000144048	DUSP11	dual specificity phosphatase 11
2648	2_73464631_74464631	All_African_meta-analysis	Liver	0.858106	ENSG00000144034	TPRKB	TP53RK binding protein
2649	2_73464631_74464631	All_African_meta-analysis	Pancreas	0.857637	ENSG00000116127	ALMS1	ALMS1 centrosome and basal body associated protein
3382	15_45639843_46639843	All_African_meta-analysis	Artery_Tibial	0.850021	ENSG00000137767	SQOR	sulfide quinone oxidoreductase
3467	2_73464631_74464631	All_African_meta-analysis	Glom.NephQTL2	0.847684	ENSG00000144048	DUSP11	dual specificity phosphatase 11
2649	2_73464631_74464631	All_African_meta-analysis	Lung	0.846929	ENSG00000144034	TPRKB	TP53RK binding protein
2649	2_73464631_74464631	All_African_meta-analysis	Colon_Sigmoid	0.845531	ENSG00000144034	TPRKB	TP53RK binding protein
3056	15_45639843_46639843	All_African_meta-analysis	Brain_Putamen_basal_ganglia	0.843657	ENSG00000137860	SLC28A2	solute carrier family 28 member 2
3382	15_45639843_46639843	All_African_meta-analysis	Thyroid	0.842543	ENSG00000275672
3380	15_45639843_46639843	All_African_meta-analysis	Liver	0.842291	ENSG00000171763	AFG2B	AFG2 AAA ATPase homolog B
3047	15_44721609_45721609	All_African_meta-analysis	Nerve_Tibial	0.841734	ENSG00000104154	SLC30A4	solute carrier family 30 member 4
3372	15_45639843_46639843	All_African_meta-analysis	Brain_Hypothalamus	0.837008	ENSG00000171763	AFG2B	AFG2 AAA ATPase homolog B
2584	15_75713980_76713980	All_African_meta-analysis	Lung	0.827942	ENSG00000167196	FBXO22	F-box protein 22
4865	7_786192_1786192	All_African_meta-analysis	Artery_Tibial	0.827805	ENSG00000164877	MICALL2	MICAL like 2
2649	2_73464631_74464631	All_African_meta-analysis	Adipose_Visceral_Omentum	0.827622	ENSG00000144034	TPRKB	TP53RK binding protein
2857	15_44721609_45721609	All_African_meta-analysis	Artery_Tibial	0.826314	ENSG00000137767	SQOR	sulfide quinone oxidoreductase
2649	2_73464631_74464631	All_African_meta-analysis	Testis	0.823571	ENSG00000273245
3382	15_45639843_46639843	All_African_meta-analysis	Muscle_Skeletal	0.820291	ENSG00000104154	SLC30A4	solute carrier family 30 member 4
2649	2_73464631_74464631	All_African_meta-analysis	Esophagus_Gastroesophageal_Junction	0.818508	ENSG00000144034	TPRKB	TP53RK binding protein
3242	15_44721609_45721609	All_African_meta-analysis	Thyroid	0.817899	ENSG00000275672
2584	15_75713980_76713980	All_African_meta-analysis	Nerve_Tibial	0.814336	ENSG00000167196	FBXO22	F-box protein 22
2584	15_75713980_76713980	All_African_meta-analysis	Thyroid	0.812679	ENSG00000167196	FBXO22	F-box protein 22
3238	15_44721609_45721609	All_African_meta-analysis	Liver	0.805342	ENSG00000171763	AFG2B	AFG2 AAA ATPase homolog B
2904	17_37234482_38234482	All_African_meta-analysis	Vagina	0.803853	ENSG00000131771	PPP1R1B	protein phosphatase 1 regulatory inhibitor subunit 1B
3381	15_45639843_46639843	All_African_meta-analysis	Brain_Hippocampus	0.800289	ENSG00000171763	AFG2B	AFG2 AAA ATPase homolog B
2647	2_73464631_74464631	All_African_meta-analysis	Small_Intestine_Terminal_Ileum	0.798279	ENSG00000144034	TPRKB	TP53RK binding protein
2584	15_75713980_76713980	All_African_meta-analysis	Heart_Left_Ventricle	0.797841	ENSG00000167196	FBXO22	F-box protein 22
2613	15_45639843_46639843	All_African_meta-analysis	Skin_Not_Sun_Exposed_Suprapubic	0.796062	ENSG00000140279	DUOX2	dual oxidase 2
2640	2_73464631_74464631	All_African_meta-analysis	Pituitary	0.792881	ENSG00000144034	TPRKB	TP53RK binding protein
3232	15_44721609_45721609	All_African_meta-analysis	Brain_Hypothalamus	0.791494	ENSG00000171763	AFG2B	AFG2 AAA ATPase homolog B
3054	15_45639843_46639843	All_African_meta-analysis	Brain_Frontal_Cortex_BA9	0.790904	ENSG00000137860	SLC28A2	solute carrier family 28 member 2
2601	2_73464631_74464631	All_African_meta-analysis	Brain_Spinal_cord_cervical_c-1	0.789535	ENSG00000144034	TPRKB	TP53RK binding protein
2649	2_73464631_74464631	All_African_meta-analysis	Adipose_Subcutaneous	0.788694	ENSG00000273245
3047	15_44721609_45721609	All_African_meta-analysis	Muscle_Skeletal	0.785808	ENSG00000104154	SLC30A4	solute carrier family 30 member 4
2912	17_37234482_38234482	All_African_meta-analysis	Esophagus_Mucosa	0.785325	ENSG00000108306	FBXL20	F-box and leucine rich repeat protein 20
2649	2_73464631_74464631	All_African_meta-analysis	Stomach	0.783016	ENSG00000144034	TPRKB	TP53RK binding protein
2655	15_45639843_46639843	All_African_meta-analysis	Artery_Aorta	0.770187	ENSG00000137857	DUOX1	dual oxidase 1
3381	15_45639843_46639843	All_African_meta-analysis	Adrenal_Gland	0.764855	ENSG00000171763	AFG2B	AFG2 AAA ATPase homolog B
2649	2_73464631_74464631	All_African_meta-analysis	Heart_Left_Ventricle	0.764471	ENSG00000116127	ALMS1	ALMS1 centrosome and basal body associated protein
2584	15_75713980_76713980	All_African_meta-analysis	Adipose_Visceral_Omentum	0.75725	ENSG00000167196	FBXO22	F-box protein 22
3382	15_45639843_46639843	All_African_meta-analysis	Esophagus_Mucosa	0.753188	ENSG00000171763	AFG2B	AFG2 AAA ATPase homolog B
2649	2_73464631_74464631	All_African_meta-analysis	Cells_Cultured_fibroblasts	0.752295	ENSG00000144034	TPRKB	TP53RK binding protein
3242	15_44721609_45721609	All_African_meta-analysis	Esophagus_Mucosa	0.749137	ENSG00000171763	AFG2B	AFG2 AAA ATPase homolog B
2321	15_45639843_46639843	All_African_meta-analysis	Nerve_Tibial	0.741174	ENSG00000140263	SORD	sorbitol dehydrogenase
4410	4_76910318_77910318	All_African_meta-analysis	Skin_Not_Sun_Exposed_Suprapubic	0.740494	ENSG00000163749	CCDC158	coiled-coil domain containing 158
3234	15_44721609_45721609	All_African_meta-analysis	Brain_Hippocampus	0.74019	ENSG00000171763	AFG2B	AFG2 AAA ATPase homolog B
2649	2_73464631_74464631	All_African_meta-analysis	Spleen	0.738888	ENSG00000144034	TPRKB	TP53RK binding protein
4320	18_76656537_77656537	All_African_meta-analysis	Esophagus_Gastroesophageal_Junction	0.738313	ENSG00000166377	ATP9B	ATPase phospholipid transporting 9B (putative)
2912	17_37234482_38234482	All_African_meta-analysis	Prostate	0.737739	ENSG00000186075	ZPBP2	zona pellucida binding protein 2
3241	15_44721609_45721609	All_African_meta-analysis	Adrenal_Gland	0.730694	ENSG00000171763	AFG2B	AFG2 AAA ATPase homolog B
2649	2_73464631_74464631	All_African_meta-analysis	Pancreas	0.730617	ENSG00000144034	TPRKB	TP53RK binding protein
2912	17_37234482_38234482	All_African_meta-analysis	Breast_Mammary_Tissue	0.729585	ENSG00000108306	FBXL20	F-box and leucine rich repeat protein 20
2649	2_73464631_74464631	All_African_meta-analysis	Stomach	0.727024	ENSG00000116127	ALMS1	ALMS1 centrosome and basal body associated protein
849	15_44721609_45721609	All_African_meta-analysis	Esophagus_Mucosa	0.725804	ENSG00000242028	HYPK	huntingtin interacting protein K
2649	2_73464631_74464631	All_African_meta-analysis	Prostate	0.72436	ENSG00000144048	DUSP11	dual specificity phosphatase 11
2649	2_73464631_74464631	All_African_meta-analysis	Nerve_Tibial	0.724198	ENSG00000230002	ALMS1-IT1
2584	15_75713980_76713980	All_African_meta-analysis	Brain_Cerebellar_Hemisphere	0.72313	ENSG00000167196	FBXO22	F-box protein 22
2649	2_73464631_74464631	All_African_meta-analysis	Artery_Aorta	0.722407	ENSG00000273245
2581	15_75713980_76713980	All_African_meta-analysis	Brain_Cerebellum	0.719656	ENSG00000167196	FBXO22	F-box protein 22
2166	17_18972894_19972894	All_African_meta-analysis	Breast_Mammary_Tissue	0.717721	ENSG00000228983	SLC47A1P1
660	17_37234482_38234482	All_African_meta-analysis	Whole_Blood	0.715486	ENSG00000274487	NPEPPSP1
2649	2_73464631_74464631	All_African_meta-analysis	Artery_Tibial	0.714557	ENSG00000273245
2584	15_75713980_76713980	All_African_meta-analysis	Artery_Aorta	0.714395	ENSG00000167196	FBXO22	F-box protein 22
2912	17_37234482_38234482	All_African_meta-analysis	Nerve_Tibial	0.711794	ENSG00000131771	PPP1R1B	protein phosphatase 1 regulatory inhibitor subunit 1B
2166	17_18972894_19972894	All_African_meta-analysis	Breast_Mammary_Tissue	0.710991	ENSG00000262681
2649	2_73464631_74464631	All_African_meta-analysis	Prostate	0.709471	ENSG00000273245
3302	15_45639843_46639843	All_African_meta-analysis	Brain_Spinal_cord_cervical_c-1	0.708882	ENSG00000171766	GATM	glycine amidinotransferase
2649	2_73464631_74464631	All_African_meta-analysis	Muscle_Skeletal	0.707176	ENSG00000116127	ALMS1	ALMS1 centrosome and basal body associated protein
3224	15_44721609_45721609	All_African_meta-analysis	Brain_Spinal_cord_cervical_c-1	0.702713	ENSG00000171766	GATM	glycine amidinotransferase
2402	17_58956589_59956589	All_African_meta-analysis	Artery_Tibial	0.700854	ENSG00000266934

## Sheet: HighPP4Kidney
nsnps	Locus	Trait	Tissue	PP.H4.abf	gene_id	hgnc_symbol	wikigene_description
4921	4_76910318_77910318	All_African_meta-analysis	Tube.NephQTL2	0.967093	ENSG00000138771	SHROOM3	shroom family member 3
2600	2_73464631_74464631	All_African_meta-analysis	Kidney_Cortex	0.907623	ENSG00000204872	NAT8B
3467	2_73464631_74464631	All_African_meta-analysis	Glom.NephQTL2	0.847684	ENSG00000144048	DUSP11	dual specificity phosphatase 11

## Sheet: HighPP3
nsnps	Locus	Trait	Tissue	PP.H3.abf	gene_id	hgnc_symbol	wikigene_description
3239	15_44721609_45721609	All_African_meta-analysis	Ovary	1	ENSG00000137860	SLC28A2	solute carrier family 28 member 2
3242	15_44721609_45721609	All_African_meta-analysis	Artery_Aorta	1	ENSG00000259479	SORD2P
3242	15_44721609_45721609	All_African_meta-analysis	Heart_Atrial_Appendage	1	ENSG00000259479	SORD2P
3239	15_44721609_45721609	All_African_meta-analysis	Brain_Cerebellar_Hemisphere	1	ENSG00000137860	SLC28A2	solute carrier family 28 member 2
3850	15_44721609_45721609	All_African_meta-analysis	Tube.NephQTL2	1	ENSG00000171763	AFG2B	AFG2 AAA ATPase homolog B
3242	15_44721609_45721609	All_African_meta-analysis	Skin_Sun_Exposed_Lower_leg	1	ENSG00000140279	DUOX2	dual oxidase 2
4072	15_45639843_46639843	All_African_meta-analysis	Tube.NephQTL2	1	ENSG00000171763	AFG2B	AFG2 AAA ATPase homolog B
3242	15_44721609_45721609	All_African_meta-analysis	Esophagus_Muscularis	1	ENSG00000259539
3239	15_44721609_45721609	All_African_meta-analysis	Brain_Cerebellar_Hemisphere	1	ENSG00000185880	TRIM69	tripartite motif containing 69
3242	15_44721609_45721609	All_African_meta-analysis	Esophagus_Mucosa	1	ENSG00000140254	DUOXA1	dual oxidase maturation factor 1
6959	11_4707604_5707604	All_African_meta-analysis	Tube.NephQTL2	1	ENSG00000121236	TRIM6	tripartite motif containing 6
3850	15_44721609_45721609	All_African_meta-analysis	Tube.NephQTL2	1	ENSG00000259520	SLC28A2-AS1
3242	15_44721609_45721609	All_African_meta-analysis	Stomach	1	ENSG00000185880	TRIM69	tripartite motif containing 69
3220	15_44721609_45721609	All_African_meta-analysis	Brain_Amygdala	1	ENSG00000259520	SLC28A2-AS1
3234	15_44721609_45721609	All_African_meta-analysis	Brain_Hippocampus	1	ENSG00000259520	SLC28A2-AS1
3850	15_44721609_45721609	All_African_meta-analysis	Tube.NephQTL2	1	ENSG00000185880	TRIM69	tripartite motif containing 69
3224	15_44721609_45721609	All_African_meta-analysis	Brain_Spinal_cord_cervical_c-1	1	ENSG00000138606	SHF	Src homology 2 domain containing F
3242	15_44721609_45721609	All_African_meta-analysis	Colon_Sigmoid	1	ENSG00000259479	SORD2P
3240	15_44721609_45721609	All_African_meta-analysis	Brain_Putamen_basal_ganglia	1	ENSG00000259520	SLC28A2-AS1
3242	15_44721609_45721609	All_African_meta-analysis	Skin_Not_Sun_Exposed_Suprapubic	1	ENSG00000259539
3380	15_45639843_46639843	All_African_meta-analysis	Minor_Salivary_Gland	1	ENSG00000273972
3241	15_44721609_45721609	All_African_meta-analysis	Brain_Cerebellum	1	ENSG00000137857	DUOX1	dual oxidase 1
3382	15_45639843_46639843	All_African_meta-analysis	Colon_Sigmoid	1	ENSG00000273972
3382	15_45639843_46639843	All_African_meta-analysis	Cells_Cultured_fibroblasts	1	ENSG00000273972
3236	15_44721609_45721609	All_African_meta-analysis	Pituitary	1	ENSG00000137860	SLC28A2	solute carrier family 28 member 2
3242	15_44721609_45721609	All_African_meta-analysis	Esophagus_Gastroesophageal_Junction	1	ENSG00000137860	SLC28A2	solute carrier family 28 member 2
3382	15_45639843_46639843	All_African_meta-analysis	Stomach	1	ENSG00000273972
3238	15_44721609_45721609	All_African_meta-analysis	Brain_Frontal_Cortex_BA9	1	ENSG00000259520	SLC28A2-AS1
3980	15_44721609_45721609	All_African_meta-analysis	Glom.NephQTL2	1	ENSG00000259479	SORD2P
3241	15_44721609_45721609	All_African_meta-analysis	Artery_Coronary	1	ENSG00000185880	TRIM69	tripartite motif containing 69
3242	15_44721609_45721609	All_African_meta-analysis	Thyroid	1	ENSG00000140254	DUOXA1	dual oxidase maturation factor 1
3242	15_44721609_45721609	All_African_meta-analysis	Breast_Mammary_Tissue	1	ENSG00000259479	SORD2P
3242	15_44721609_45721609	All_African_meta-analysis	Artery_Tibial	1	ENSG00000259539
3242	15_44721609_45721609	All_African_meta-analysis	Esophagus_Mucosa	1	ENSG00000259520	SLC28A2-AS1
3174	15_44721609_45721609	All_African_meta-analysis	Brain_Anterior_cingulate_cortex_BA24	1	ENSG00000259520	SLC28A2-AS1
3242	15_44721609_45721609	All_African_meta-analysis	Artery_Aorta	1	ENSG00000137860	SLC28A2	solute carrier family 28 member 2
3232	15_44721609_45721609	All_African_meta-analysis	Brain_Hypothalamus	1	ENSG00000259520	SLC28A2-AS1
3382	15_45639843_46639843	All_African_meta-analysis	Spleen	1	ENSG00000273972
3239	15_44721609_45721609	All_African_meta-analysis	Uterus	1	ENSG00000259520	SLC28A2-AS1
3382	15_45639843_46639843	All_African_meta-analysis	Adipose_Visceral_Omentum	1	ENSG00000273972
3242	15_44721609_45721609	All_African_meta-analysis	Colon_Transverse	1	ENSG00000185880	TRIM69	tripartite motif containing 69
3242	15_44721609_45721609	All_African_meta-analysis	Esophagus_Muscularis	1	ENSG00000259479	SORD2P
3242	15_44721609_45721609	All_African_meta-analysis	Esophagus_Mucosa	1	ENSG00000137857	DUOX1	dual oxidase 1
3239	15_44721609_45721609	All_African_meta-analysis	Brain_Cerebellar_Hemisphere	1	ENSG00000259520	SLC28A2-AS1
3382	15_45639843_46639843	All_African_meta-analysis	Artery_Tibial	1	ENSG00000273972
3242	15_44721609_45721609	All_African_meta-analysis	Thyroid	1	ENSG00000185880	TRIM69	tripartite motif containing 69
3242	15_44721609_45721609	All_African_meta-analysis	Skin_Not_Sun_Exposed_Suprapubic	1	ENSG00000259479	SORD2P
3242	15_44721609_45721609	All_African_meta-analysis	Lung	1	ENSG00000185880	TRIM69	tripartite motif containing 69
3239	15_44721609_45721609	All_African_meta-analysis	Ovary	1	ENSG00000259520	SLC28A2-AS1
3240	15_44721609_45721609	All_African_meta-analysis	Minor_Salivary_Gland	1	ENSG00000259520	SLC28A2-AS1
3242	15_44721609_45721609	All_African_meta-analysis	Esophagus_Mucosa	1	ENSG00000185880	TRIM69	tripartite motif containing 69
3382	15_45639843_46639843	All_African_meta-analysis	Esophagus_Mucosa	1	ENSG00000273972
3242	15_44721609_45721609	All_African_meta-analysis	Artery_Tibial	1	ENSG00000137860	SLC28A2	solute carrier family 28 member 2
3242	15_44721609_45721609	All_African_meta-analysis	Adipose_Visceral_Omentum	1	ENSG00000259479	SORD2P
3242	15_44721609_45721609	All_African_meta-analysis	Heart_Left_Ventricle	1	ENSG00000185880	TRIM69	tripartite motif containing 69
3382	15_45639843_46639843	All_African_meta-analysis	Breast_Mammary_Tissue	1	ENSG00000273972
3242	15_44721609_45721609	All_African_meta-analysis	Brain_Cortex	1	ENSG00000259520	SLC28A2-AS1
3242	15_44721609_45721609	All_African_meta-analysis	Esophagus_Muscularis	1	ENSG00000137860	SLC28A2	solute carrier family 28 member 2
3242	15_44721609_45721609	All_African_meta-analysis	Colon_Transverse	1	ENSG00000259479	SORD2P
4337	15_45639843_46639843	All_African_meta-analysis	TGP_Cell_lines	1	ENSG00000259520.6	SLC28A2-AS1
3382	15_45639843_46639843	All_African_meta-analysis	Esophagus_Muscularis	1	ENSG00000273972
3242	15_44721609_45721609	All_African_meta-analysis	Nerve_Tibial	1	ENSG00000137860	SLC28A2	solute carrier family 28 member 2
3242	15_44721609_45721609	All_African_meta-analysis	Artery_Tibial	1	ENSG00000259479	SORD2P
3242	15_44721609_45721609	All_African_meta-analysis	Brain_Caudate_basal_ganglia	1	ENSG00000259520	SLC28A2-AS1
3382	15_45639843_46639843	All_African_meta-analysis	Cells_Cultured_fibroblasts	1	ENSG00000137767	SQOR	sulfide quinone oxidoreductase
3242	15_44721609_45721609	All_African_meta-analysis	Prostate	1	ENSG00000259520	SLC28A2-AS1
3241	15_44721609_45721609	All_African_meta-analysis	Brain_Cerebellum	1	ENSG00000259520	SLC28A2-AS1
3241	15_44721609_45721609	All_African_meta-analysis	Brain_Cerebellum	1	ENSG00000185880	TRIM69	tripartite motif containing 69
3242	15_44721609_45721609	All_African_meta-analysis	Stomach	1	ENSG00000259479	SORD2P
3242	15_44721609_45721609	All_African_meta-analysis	Whole_Blood	1	ENSG00000171763	AFG2B	AFG2 AAA ATPase homolog B
3382	15_45639843_46639843	All_African_meta-analysis	Whole_Blood	1	ENSG00000171763	AFG2B	AFG2 AAA ATPase homolog B
3241	15_44721609_45721609	All_African_meta-analysis	Artery_Coronary	1	ENSG00000259520	SLC28A2-AS1
3382	15_45639843_46639843	All_African_meta-analysis	Lung	1	ENSG00000273972
3242	15_44721609_45721609	All_African_meta-analysis	Skin_Sun_Exposed_Lower_leg	1	ENSG00000185880	TRIM69	tripartite motif containing 69
3242	15_44721609_45721609	All_African_meta-analysis	Adipose_Visceral_Omentum	1	ENSG00000185880	TRIM69	tripartite motif containing 69
3242	15_44721609_45721609	All_African_meta-analysis	Breast_Mammary_Tissue	1	ENSG00000185880	TRIM69	tripartite motif containing 69
3242	15_44721609_45721609	All_African_meta-analysis	Adipose_Subcutaneous	1	ENSG00000259479	SORD2P
3242	15_44721609_45721609	All_African_meta-analysis	Esophagus_Mucosa	1	ENSG00000259479	SORD2P
3242	15_44721609_45721609	All_African_meta-analysis	Whole_Blood	1	ENSG00000259479	SORD2P
3242	15_44721609_45721609	All_African_meta-analysis	Skin_Not_Sun_Exposed_Suprapubic	1	ENSG00000185880	TRIM69	tripartite motif containing 69
3242	15_44721609_45721609	All_African_meta-analysis	Cells_Cultured_fibroblasts	1	ENSG00000259479	SORD2P
3242	15_44721609_45721609	All_African_meta-analysis	Testis	1	ENSG00000259520	SLC28A2-AS1
3241	15_44721609_45721609	All_African_meta-analysis	Brain_Nucleus_accumbens_basal_ganglia	1	ENSG00000259520	SLC28A2-AS1
3242	15_44721609_45721609	All_African_meta-analysis	Skin_Sun_Exposed_Lower_leg	1	ENSG00000259539
3382	15_45639843_46639843	All_African_meta-analysis	Skin_Not_Sun_Exposed_Suprapubic	1	ENSG00000273972
3382	15_45639843_46639843	All_African_meta-analysis	Muscle_Skeletal	1	ENSG00000273972
3242	15_44721609_45721609	All_African_meta-analysis	Muscle_Skeletal	1	ENSG00000259479	SORD2P
3242	15_44721609_45721609	All_African_meta-analysis	Heart_Atrial_Appendage	1	ENSG00000185880	TRIM69	tripartite motif containing 69
3236	15_44721609_45721609	All_African_meta-analysis	Pituitary	1	ENSG00000259520	SLC28A2-AS1
3242	15_44721609_45721609	All_African_meta-analysis	Cells_Cultured_fibroblasts	1	ENSG00000137860	SLC28A2	solute carrier family 28 member 2
4632	15_45639843_46639843	All_African_meta-analysis	TGP_Cell_lines	1	ENSG00000137767.14	SQOR	sulfide quinone oxidoreductase
3242	15_44721609_45721609	All_African_meta-analysis	Nerve_Tibial	1	ENSG00000259479	SORD2P
3382	15_45639843_46639843	All_African_meta-analysis	Nerve_Tibial	1	ENSG00000273972
3241	15_44721609_45721609	All_African_meta-analysis	Adrenal_Gland	1	ENSG00000259520	SLC28A2-AS1
3382	15_45639843_46639843	All_African_meta-analysis	Adipose_Subcutaneous	1	ENSG00000273972
3242	15_44721609_45721609	All_African_meta-analysis	Thyroid	1	ENSG00000259539
3242	15_44721609_45721609	All_African_meta-analysis	Lung	1	ENSG00000259520	SLC28A2-AS1
4632	15_45639843_46639843	All_African_meta-analysis	TGP_Cell_lines	1	ENSG00000171763.20	AFG2B	AFG2 AAA ATPase homolog B
3242	15_44721609_45721609	All_African_meta-analysis	Thyroid	1	ENSG00000137857	DUOX1	dual oxidase 1
3242	15_44721609_45721609	All_African_meta-analysis	Skin_Sun_Exposed_Lower_leg	1	ENSG00000259479	SORD2P
3242	15_44721609_45721609	All_African_meta-analysis	Thyroid	1	ENSG00000137860	SLC28A2	solute carrier family 28 member 2
3242	15_44721609_45721609	All_African_meta-analysis	Skin_Sun_Exposed_Lower_leg	1	ENSG00000140263	SORD	sorbitol dehydrogenase
3242	15_44721609_45721609	All_African_meta-analysis	Skin_Not_Sun_Exposed_Suprapubic	1	ENSG00000140263	SORD	sorbitol dehydrogenase
3850	15_44721609_45721609	All_African_meta-analysis	Tube.NephQTL2	1	ENSG00000259479	SORD2P
3242	15_44721609_45721609	All_African_meta-analysis	Skin_Not_Sun_Exposed_Suprapubic	1	ENSG00000259520	SLC28A2-AS1
3242	15_44721609_45721609	All_African_meta-analysis	Adipose_Visceral_Omentum	1	ENSG00000259520	SLC28A2-AS1
3242	15_44721609_45721609	All_African_meta-analysis	Thyroid	1	ENSG00000259479	SORD2P
3242	15_44721609_45721609	All_African_meta-analysis	Stomach	1	ENSG00000259520	SLC28A2-AS1
3242	15_44721609_45721609	All_African_meta-analysis	Esophagus_Muscularis	1	ENSG00000185880	TRIM69	tripartite motif containing 69
3242	15_44721609_45721609	All_African_meta-analysis	Cells_Cultured_fibroblasts	1	ENSG00000185880	TRIM69	tripartite motif containing 69
3242	15_44721609_45721609	All_African_meta-analysis	Nerve_Tibial	1	ENSG00000185880	TRIM69	tripartite motif containing 69
3242	15_44721609_45721609	All_African_meta-analysis	Adipose_Subcutaneous	1	ENSG00000185880	TRIM69	tripartite motif containing 69
3242	15_44721609_45721609	All_African_meta-analysis	Muscle_Skeletal	1	ENSG00000185880	TRIM69	tripartite motif containing 69
3242	15_44721609_45721609	All_African_meta-analysis	Esophagus_Gastroesophageal_Junction	1	ENSG00000185880	TRIM69	tripartite motif containing 69
3382	15_45639843_46639843	All_African_meta-analysis	Cells_Cultured_fibroblasts	1	ENSG00000171763	AFG2B	AFG2 AAA ATPase homolog B
3242	15_44721609_45721609	All_African_meta-analysis	Cells_Cultured_fibroblasts	1	ENSG00000171763	AFG2B	AFG2 AAA ATPase homolog B
3382	15_45639843_46639843	All_African_meta-analysis	Skin_Sun_Exposed_Lower_leg	1	ENSG00000273972
3382	15_45639843_46639843	All_African_meta-analysis	Colon_Transverse	1	ENSG00000273972
3382	15_45639843_46639843	All_African_meta-analysis	Whole_Blood	1	ENSG00000273972
3242	15_44721609_45721609	All_African_meta-analysis	Artery_Tibial	1	ENSG00000185880	TRIM69	tripartite motif containing 69
3242	15_44721609_45721609	All_African_meta-analysis	Artery_Aorta	1	ENSG00000185880	TRIM69	tripartite motif containing 69
3382	15_45639843_46639843	All_African_meta-analysis	Thyroid	1	ENSG00000273972
3242	15_44721609_45721609	All_African_meta-analysis	Testis	1	ENSG00000185880	TRIM69	tripartite motif containing 69
3242	15_44721609_45721609	All_African_meta-analysis	Colon_Sigmoid	1	ENSG00000185880	TRIM69	tripartite motif containing 69
3242	15_44721609_45721609	All_African_meta-analysis	Colon_Sigmoid	1	ENSG00000259520	SLC28A2-AS1
3242	15_44721609_45721609	All_African_meta-analysis	Muscle_Skeletal	1	ENSG00000259520	SLC28A2-AS1
3242	15_44721609_45721609	All_African_meta-analysis	Skin_Sun_Exposed_Lower_leg	1	ENSG00000259520	SLC28A2-AS1
3242	15_44721609_45721609	All_African_meta-analysis	Breast_Mammary_Tissue	1	ENSG00000259520	SLC28A2-AS1
3242	15_44721609_45721609	All_African_meta-analysis	Heart_Atrial_Appendage	1	ENSG00000259520	SLC28A2-AS1
3242	15_44721609_45721609	All_African_meta-analysis	Colon_Transverse	1	ENSG00000259520	SLC28A2-AS1
3242	15_44721609_45721609	All_African_meta-analysis	Adipose_Subcutaneous	1	ENSG00000259520	SLC28A2-AS1
3242	15_44721609_45721609	All_African_meta-analysis	Heart_Left_Ventricle	1	ENSG00000259520	SLC28A2-AS1
3242	15_44721609_45721609	All_African_meta-analysis	Artery_Aorta	1	ENSG00000259520	SLC28A2-AS1
3242	15_44721609_45721609	All_African_meta-analysis	Artery_Tibial	1	ENSG00000259520	SLC28A2-AS1
3242	15_44721609_45721609	All_African_meta-analysis	Nerve_Tibial	1	ENSG00000259520	SLC28A2-AS1
3242	15_44721609_45721609	All_African_meta-analysis	Esophagus_Muscularis	1	ENSG00000259520	SLC28A2-AS1
3242	15_44721609_45721609	All_African_meta-analysis	Esophagus_Gastroesophageal_Junction	1	ENSG00000259520	SLC28A2-AS1
3242	15_44721609_45721609	All_African_meta-analysis	Thyroid	1	ENSG00000259520	SLC28A2-AS1
3242	15_44721609_45721609	All_African_meta-analysis	Cells_Cultured_fibroblasts	1	ENSG00000259520	SLC28A2-AS1
7844	11_4707604_5707604	All_African_meta-analysis	TGP_Cell_lines	1	ENSG00000258659.7	TRIM34	tripartite motif containing 34
7844	11_4707604_5707604	All_African_meta-analysis	TGP_Cell_lines	1	ENSG00000175518.8	UBQLNL	ubiquilin like
3242	15_44721609_45721609	All_African_meta-analysis	Nerve_Tibial	1	ENSG00000171763	AFG2B	AFG2 AAA ATPase homolog B
3242	15_44721609_45721609	All_African_meta-analysis	Artery_Aorta	1	ENSG00000171763	AFG2B	AFG2 AAA ATPase homolog B
3382	15_45639843_46639843	All_African_meta-analysis	Artery_Aorta	1	ENSG00000171763	AFG2B	AFG2 AAA ATPase homolog B
3382	15_45639843_46639843	All_African_meta-analysis	Nerve_Tibial	1	ENSG00000171763	AFG2B	AFG2 AAA ATPase homolog B
3239	15_44721609_45721609	All_African_meta-analysis	Brain_Cerebellar_Hemisphere	1	ENSG00000259539
3371	15_45639843_46639843	All_African_meta-analysis	Small_Intestine_Terminal_Ileum	1	ENSG00000273972
7844	11_4707604_5707604	All_African_meta-analysis	TGP_Cell_lines	1	ENSG00000224295.3	OLFM5P
3382	15_45639843_46639843	All_African_meta-analysis	Esophagus_Gastroesophageal_Junction	1	ENSG00000273972
3242	15_44721609_45721609	All_African_meta-analysis	Skin_Sun_Exposed_Lower_leg	1	ENSG00000140254	DUOXA1	dual oxidase maturation factor 1
3141	15_45639843_46639843	All_African_meta-analysis	Skin_Not_Sun_Exposed_Suprapubic	1	ENSG00000259520	SLC28A2-AS1
3241	15_44721609_45721609	All_African_meta-analysis	Artery_Coronary	1	ENSG00000137860	SLC28A2	solute carrier family 28 member 2
3242	15_44721609_45721609	All_African_meta-analysis	Nerve_Tibial	1	ENSG00000140263	SORD	sorbitol dehydrogenase
3242	15_44721609_45721609	All_African_meta-analysis	Skin_Sun_Exposed_Lower_leg	1	ENSG00000137857	DUOX1	dual oxidase 1
3242	15_44721609_45721609	All_African_meta-analysis	Prostate	1	ENSG00000259479	SORD2P
3242	15_44721609_45721609	All_African_meta-analysis	Adipose_Subcutaneous	1	ENSG00000259539
3242	15_44721609_45721609	All_African_meta-analysis	Esophagus_Muscularis	1	ENSG00000259433
3239	15_44721609_45721609	All_African_meta-analysis	Ovary	1	ENSG00000259433
3242	15_44721609_45721609	All_African_meta-analysis	Artery_Aorta	1	ENSG00000259539
3141	15_45639843_46639843	All_African_meta-analysis	Artery_Tibial	1	ENSG00000259520	SLC28A2-AS1
3250	15_45639843_46639843	All_African_meta-analysis	Brain_Spinal_cord_cervical_c-1	1	ENSG00000259433
3141	15_45639843_46639843	All_African_meta-analysis	Brain_Cortex	1	ENSG00000259520	SLC28A2-AS1
3329	15_45639843_46639843	All_African_meta-analysis	Brain_Caudate_basal_ganglia	1	ENSG00000259433
3141	15_45639843_46639843	All_African_meta-analysis	Pituitary	1	ENSG00000259520	SLC28A2-AS1
3329	15_45639843_46639843	All_African_meta-analysis	Brain_Hippocampus	1	ENSG00000259433
3329	15_45639843_46639843	All_African_meta-analysis	Brain_Cerebellar_Hemisphere	1	ENSG00000259433
3330	15_45639843_46639843	All_African_meta-analysis	Brain_Cerebellum	1	ENSG00000259433
3241	15_44721609_45721609	All_African_meta-analysis	Brain_Cerebellum	1	ENSG00000259433
3330	15_45639843_46639843	All_African_meta-analysis	Pancreas	1	ENSG00000259433
3224	15_44721609_45721609	All_African_meta-analysis	Brain_Spinal_cord_cervical_c-1	1	ENSG00000259433
3330	15_45639843_46639843	All_African_meta-analysis	Testis	1	ENSG00000259433
3242	15_44721609_45721609	All_African_meta-analysis	Adipose_Subcutaneous	1	ENSG00000259433
3330	15_45639843_46639843	All_African_meta-analysis	Esophagus_Muscularis	1	ENSG00000259433
3330	15_45639843_46639843	All_African_meta-analysis	Adipose_Subcutaneous	1	ENSG00000259433
2731	15_45639843_46639843	All_African_meta-analysis	Skin_Sun_Exposed_Lower_leg	1	ENSG00000259539
3141	15_45639843_46639843	All_African_meta-analysis	Breast_Mammary_Tissue	1	ENSG00000259520	SLC28A2-AS1
3242	15_44721609_45721609	All_African_meta-analysis	Pancreas	1	ENSG00000259433
3242	15_44721609_45721609	All_African_meta-analysis	Brain_Caudate_basal_ganglia	1	ENSG00000259433
3140	15_45639843_46639843	All_African_meta-analysis	Adrenal_Gland	1	ENSG00000259520	SLC28A2-AS1
3239	15_44721609_45721609	All_African_meta-analysis	Brain_Cerebellar_Hemisphere	1	ENSG00000259433
3234	15_44721609_45721609	All_African_meta-analysis	Brain_Hippocampus	1	ENSG00000259433
3242	15_44721609_45721609	All_African_meta-analysis	Testis	1	ENSG00000259433
3329	15_45639843_46639843	All_African_meta-analysis	Ovary	1	ENSG00000259433
3242	15_44721609_45721609	All_African_meta-analysis	Nerve_Tibial	1	ENSG00000259539
3242	15_44721609_45721609	All_African_meta-analysis	Nerve_Tibial	1	ENSG00000259433
3330	15_45639843_46639843	All_African_meta-analysis	Nerve_Tibial	1	ENSG00000259433
3224	15_44721609_45721609	All_African_meta-analysis	Brain_Substantia_nigra	1	ENSG00000259520	SLC28A2-AS1
3056	15_45639843_46639843	All_African_meta-analysis	Nerve_Tibial	1	ENSG00000137860	SLC28A2	solute carrier family 28 member 2
3141	15_45639843_46639843	All_African_meta-analysis	Heart_Left_Ventricle	1	ENSG00000259520	SLC28A2-AS1
3330	15_45639843_46639843	All_African_meta-analysis	Thyroid	1	ENSG00000259433
3139	15_45639843_46639843	All_African_meta-analysis	Artery_Coronary	1	ENSG00000259520	SLC28A2-AS1
3141	15_45639843_46639843	All_African_meta-analysis	Artery_Aorta	1	ENSG00000259520	SLC28A2-AS1
3141	15_45639843_46639843	All_African_meta-analysis	Colon_Sigmoid	1	ENSG00000259520	SLC28A2-AS1
3056	15_45639843_46639843	All_African_meta-analysis	Thyroid	1	ENSG00000137860	SLC28A2	solute carrier family 28 member 2
3141	15_45639843_46639843	All_African_meta-analysis	Lung	1	ENSG00000259520	SLC28A2-AS1
3141	15_45639843_46639843	All_African_meta-analysis	Skin_Sun_Exposed_Lower_leg	1	ENSG00000259520	SLC28A2-AS1
3224	15_44721609_45721609	All_African_meta-analysis	Brain_Spinal_cord_cervical_c-1	1	ENSG00000259520	SLC28A2-AS1
3242	15_44721609_45721609	All_African_meta-analysis	Thyroid	1	ENSG00000259433
3141	15_45639843_46639843	All_African_meta-analysis	Heart_Atrial_Appendage	1	ENSG00000259520	SLC28A2-AS1
3141	15_45639843_46639843	All_African_meta-analysis	Stomach	1	ENSG00000259520	SLC28A2-AS1
3141	15_45639843_46639843	All_African_meta-analysis	Nerve_Tibial	1	ENSG00000259520	SLC28A2-AS1
3141	15_45639843_46639843	All_African_meta-analysis	Muscle_Skeletal	1	ENSG00000259520	SLC28A2-AS1
3056	15_45639843_46639843	All_African_meta-analysis	Cells_Cultured_fibroblasts	1	ENSG00000137860	SLC28A2	solute carrier family 28 member 2
3141	15_45639843_46639843	All_African_meta-analysis	Esophagus_Gastroesophageal_Junction	1	ENSG00000259520	SLC28A2-AS1
3141	15_45639843_46639843	All_African_meta-analysis	Thyroid	1	ENSG00000259520	SLC28A2-AS1
3242	15_44721609_45721609	All_African_meta-analysis	Skin_Not_Sun_Exposed_Suprapubic	1	ENSG00000259433
3141	15_45639843_46639843	All_African_meta-analysis	Adipose_Visceral_Omentum	1	ENSG00000259520	SLC28A2-AS1
3242	15_44721609_45721609	All_African_meta-analysis	Artery_Tibial	1	ENSG00000259433
3330	15_45639843_46639843	All_African_meta-analysis	Skin_Not_Sun_Exposed_Suprapubic	1	ENSG00000259433
3141	15_45639843_46639843	All_African_meta-analysis	Adipose_Subcutaneous	1	ENSG00000259520	SLC28A2-AS1
3141	15_45639843_46639843	All_African_meta-analysis	Cells_Cultured_fibroblasts	1	ENSG00000259520	SLC28A2-AS1
3330	15_45639843_46639843	All_African_meta-analysis	Artery_Tibial	1	ENSG00000259433
3330	15_45639843_46639843	All_African_meta-analysis	Skin_Sun_Exposed_Lower_leg	1	ENSG00000259433
3141	15_45639843_46639843	All_African_meta-analysis	Esophagus_Muscularis	1	ENSG00000259520	SLC28A2-AS1
3242	15_44721609_45721609	All_African_meta-analysis	Skin_Sun_Exposed_Lower_leg	1	ENSG00000259433
3135	15_45639843_46639843	All_African_meta-analysis	Brain_Anterior_cingulate_cortex_BA24	1	ENSG00000259520	SLC28A2-AS1
3850	15_44721609_45721609	All_African_meta-analysis	Tube.NephQTL2	1	ENSG00000137860	SLC28A2	solute carrier family 28 member 2
3330	15_45639843_46639843	All_African_meta-analysis	Brain_Putamen_basal_ganglia	1	ENSG00000259433
3241	15_44721609_45721609	All_African_meta-analysis	Artery_Coronary	1	ENSG00000259479	SORD2P
3240	15_44721609_45721609	All_African_meta-analysis	Brain_Putamen_basal_ganglia	1	ENSG00000259433
3056	15_45639843_46639843	All_African_meta-analysis	Artery_Tibial	1	ENSG00000137860	SLC28A2	solute carrier family 28 member 2
3141	15_45639843_46639843	All_African_meta-analysis	Brain_Nucleus_accumbens_basal_ganglia	1	ENSG00000259520	SLC28A2-AS1
3239	15_44721609_45721609	All_African_meta-analysis	Brain_Cerebellar_Hemisphere	1	ENSG00000137857	DUOX1	dual oxidase 1
3980	15_44721609_45721609	All_African_meta-analysis	Glom.NephQTL2	1	ENSG00000259520	SLC28A2-AS1
3233	15_44721609_45721609	All_African_meta-analysis	Vagina	1	ENSG00000259520	SLC28A2-AS1
3242	15_44721609_45721609	All_African_meta-analysis	Brain_Cortex	1	ENSG00000185880	TRIM69	tripartite motif containing 69
3242	15_44721609_45721609	All_African_meta-analysis	Skin_Sun_Exposed_Lower_leg	1	ENSG00000140274	DUOXA2	dual oxidase maturation factor 2
3141	15_45639843_46639843	All_African_meta-analysis	Brain_Cerebellum	1	ENSG00000259520	SLC28A2-AS1
7844	11_4707604_5707604	All_African_meta-analysis	TGP_Cell_lines	1	ENSG00000121236.21	TRIM6	tripartite motif containing 6
3242	15_44721609_45721609	All_African_meta-analysis	Lung	1	ENSG00000259479	SORD2P
3242	15_44721609_45721609	All_African_meta-analysis	Heart_Left_Ventricle	1	ENSG00000259479	SORD2P
3330	15_45639843_46639843	All_African_meta-analysis	Brain_Nucleus_accumbens_basal_ganglia	1	ENSG00000259433
3382	15_45639843_46639843	All_African_meta-analysis	Prostate	1	ENSG00000273972
3241	15_44721609_45721609	All_African_meta-analysis	Cells_EBV-transformed_lymphocytes	1	ENSG00000137860	SLC28A2	solute carrier family 28 member 2
3242	15_44721609_45721609	All_African_meta-analysis	Brain_Cortex	1	ENSG00000259433
4445	15_44721609_45721609	All_African_meta-analysis	TGP_Cell_lines	1	ENSG00000259520.6	SLC28A2-AS1
3241	15_44721609_45721609	All_African_meta-analysis	Brain_Nucleus_accumbens_basal_ganglia	1	ENSG00000259433
3382	15_45639843_46639843	All_African_meta-analysis	Thyroid	1	ENSG00000171763	AFG2B	AFG2 AAA ATPase homolog B
3242	15_44721609_45721609	All_African_meta-analysis	Thyroid	1	ENSG00000171763	AFG2B	AFG2 AAA ATPase homolog B
3330	15_45639843_46639843	All_African_meta-analysis	Brain_Cortex	1	ENSG00000259433
3241	15_44721609_45721609	All_African_meta-analysis	Adrenal_Gland	1	ENSG00000140263	SORD	sorbitol dehydrogenase
3241	15_44721609_45721609	All_African_meta-analysis	Artery_Coronary	1	ENSG00000259433
3242	15_44721609_45721609	All_African_meta-analysis	Spleen	1	ENSG00000259479	SORD2P
6959	11_4707604_5707604	All_African_meta-analysis	Tube.NephQTL2	1	ENSG00000258588	TRIM6-TRIM34	TRIM6-TRIM34 readthrough
3980	15_44721609_45721609	All_African_meta-analysis	Glom.NephQTL2	1	ENSG00000185880	TRIM69	tripartite motif containing 69
3242	15_44721609_45721609	All_African_meta-analysis	Prostate	1	ENSG00000185880	TRIM69	tripartite motif containing 69
3242	15_44721609_45721609	All_African_meta-analysis	Esophagus_Muscularis	1	ENSG00000171763	AFG2B	AFG2 AAA ATPase homolog B
3141	15_45639843_46639843	All_African_meta-analysis	Prostate	1	ENSG00000259520	SLC28A2-AS1
3382	15_45639843_46639843	All_African_meta-analysis	Esophagus_Muscularis	1	ENSG00000171763	AFG2B	AFG2 AAA ATPase homolog B
3327	15_45639843_46639843	All_African_meta-analysis	Artery_Coronary	1	ENSG00000259433
3242	15_44721609_45721609	All_African_meta-analysis	Esophagus_Gastroesophageal_Junction	1	ENSG00000259539
3382	15_45639843_46639843	All_African_meta-analysis	Artery_Aorta	1	ENSG00000273972
3242	15_44721609_45721609	All_African_meta-analysis	Lung	1	ENSG00000140263	SORD	sorbitol dehydrogenase
2731	15_45639843_46639843	All_African_meta-analysis	Thyroid	1	ENSG00000259539
3242	15_44721609_45721609	All_African_meta-analysis	Prostate	1	ENSG00000137860	SLC28A2	solute carrier family 28 member 2
3241	15_44721609_45721609	All_African_meta-analysis	Brain_Cerebellum	1	ENSG00000259539
3242	15_44721609_45721609	All_African_meta-analysis	Colon_Transverse	1	ENSG00000140263	SORD	sorbitol dehydrogenase
3241	15_44721609_45721609	All_African_meta-analysis	Brain_Cerebellum	1	ENSG00000138606	SHF	Src homology 2 domain containing F
3240	15_44721609_45721609	All_African_meta-analysis	Brain_Putamen_basal_ganglia	1	ENSG00000185880	TRIM69	tripartite motif containing 69
3056	15_45639843_46639843	All_African_meta-analysis	Brain_Cerebellar_Hemisphere	1	ENSG00000137860	SLC28A2	solute carrier family 28 member 2
3382	15_45639843_46639843	All_African_meta-analysis	Pancreas	1	ENSG00000273972
3382	15_45639843_46639843	All_African_meta-analysis	Heart_Atrial_Appendage	1	ENSG00000273972
3241	15_44721609_45721609	All_African_meta-analysis	Small_Intestine_Terminal_Ileum	1	ENSG00000259479	SORD2P
3242	15_44721609_45721609	All_African_meta-analysis	Colon_Transverse	1	ENSG00000137860	SLC28A2	solute carrier family 28 member 2
3242	15_44721609_45721609	All_African_meta-analysis	Muscle_Skeletal	1	ENSG00000259433
3242	15_44721609_45721609	All_African_meta-analysis	Adipose_Visceral_Omentum	1	ENSG00000171763	AFG2B	AFG2 AAA ATPase homolog B
3382	15_45639843_46639843	All_African_meta-analysis	Adipose_Visceral_Omentum	1	ENSG00000171763	AFG2B	AFG2 AAA ATPase homolog B
3697	17_37234482_38234482	All_African_meta-analysis	Glom.NephQTL2	1	ENSG00000167914	GSDMA	gasdermin A
3697	17_37234482_38234482	All_African_meta-analysis	Glom.NephQTL2	1	ENSG00000108344	PSMD3	proteasome 26S subunit, non-ATPase 3
2861	17_37234482_38234482	All_African_meta-analysis	Testis	1	ENSG00000263818	RDM1P5
2912	17_37234482_38234482	All_African_meta-analysis	Testis	1	ENSG00000186075	ZPBP2	zona pellucida binding protein 2
2912	17_37234482_38234482	All_African_meta-analysis	Whole_Blood	1	ENSG00000161381	PLXDC1	plexin domain containing 1
2912	17_37234482_38234482	All_African_meta-analysis	Adrenal_Gland	1	ENSG00000167914	GSDMA	gasdermin A
2912	17_37234482_38234482	All_African_meta-analysis	Artery_Tibial	1	ENSG00000167914	GSDMA	gasdermin A
2912	17_37234482_38234482	All_African_meta-analysis	Muscle_Skeletal	1	ENSG00000008838	MED24	mediator complex subunit 24
2912	17_37234482_38234482	All_African_meta-analysis	Heart_Atrial_Appendage	1	ENSG00000167914	GSDMA	gasdermin A
2912	17_37234482_38234482	All_African_meta-analysis	Esophagus_Muscularis	1	ENSG00000167914	GSDMA	gasdermin A
2912	17_37234482_38234482	All_African_meta-analysis	Adipose_Subcutaneous	1	ENSG00000167914	GSDMA	gasdermin A
2912	17_37234482_38234482	All_African_meta-analysis	Adipose_Visceral_Omentum	1	ENSG00000167914	GSDMA	gasdermin A
2912	17_37234482_38234482	All_African_meta-analysis	Artery_Aorta	1	ENSG00000167914	GSDMA	gasdermin A
2912	17_37234482_38234482	All_African_meta-analysis	Muscle_Skeletal	1	ENSG00000167914	GSDMA	gasdermin A
2912	17_37234482_38234482	All_African_meta-analysis	Lung	1	ENSG00000167914	GSDMA	gasdermin A
2912	17_37234482_38234482	All_African_meta-analysis	Heart_Left_Ventricle	1	ENSG00000167914	GSDMA	gasdermin A
2912	17_37234482_38234482	All_African_meta-analysis	Thyroid	1	ENSG00000167914	GSDMA	gasdermin A
2912	17_37234482_38234482	All_African_meta-analysis	Breast_Mammary_Tissue	1	ENSG00000167914	GSDMA	gasdermin A
2912	17_37234482_38234482	All_African_meta-analysis	Stomach	1	ENSG00000167914	GSDMA	gasdermin A
2912	17_37234482_38234482	All_African_meta-analysis	Colon_Sigmoid	1	ENSG00000167914	GSDMA	gasdermin A
2912	17_37234482_38234482	All_African_meta-analysis	Colon_Transverse	1	ENSG00000167914	GSDMA	gasdermin A
2912	17_37234482_38234482	All_African_meta-analysis	Cells_Cultured_fibroblasts	1	ENSG00000172057	ORMDL3	ORMDL sphingolipid biosynthesis regulator 3
2912	17_37234482_38234482	All_African_meta-analysis	Cells_Cultured_fibroblasts	1	ENSG00000167914	GSDMA	gasdermin A
2912	17_37234482_38234482	All_African_meta-analysis	Artery_Aorta	1	ENSG00000008838	MED24	mediator complex subunit 24
2912	17_37234482_38234482	All_African_meta-analysis	Thyroid	1	ENSG00000008838	MED24	mediator complex subunit 24
2912	17_37234482_38234482	All_African_meta-analysis	Artery_Tibial	1	ENSG00000008838	MED24	mediator complex subunit 24
2912	17_37234482_38234482	All_African_meta-analysis	Esophagus_Gastroesophageal_Junction	1	ENSG00000167914	GSDMA	gasdermin A
2912	17_37234482_38234482	All_African_meta-analysis	Testis	1	ENSG00000008838	MED24	mediator complex subunit 24
2912	17_37234482_38234482	All_African_meta-analysis	Esophagus_Gastroesophageal_Junction	1	ENSG00000008838	MED24	mediator complex subunit 24
2912	17_37234482_38234482	All_African_meta-analysis	Artery_Tibial	1	ENSG00000141750	STAC2	SH3 and cysteine rich domain 2
2911	17_37234482_38234482	All_African_meta-analysis	Artery_Coronary	1	ENSG00000167914	GSDMA	gasdermin A
2912	17_37234482_38234482	All_African_meta-analysis	Nerve_Tibial	1	ENSG00000167914	GSDMA	gasdermin A
2912	17_37234482_38234482	All_African_meta-analysis	Esophagus_Muscularis	1	ENSG00000008838	MED24	mediator complex subunit 24
2912	17_37234482_38234482	All_African_meta-analysis	Colon_Transverse	1	ENSG00000008838	MED24	mediator complex subunit 24
2912	17_37234482_38234482	All_African_meta-analysis	Adipose_Subcutaneous	1	ENSG00000008838	MED24	mediator complex subunit 24
2912	17_37234482_38234482	All_African_meta-analysis	Nerve_Tibial	1	ENSG00000008838	MED24	mediator complex subunit 24
2912	17_37234482_38234482	All_African_meta-analysis	Skin_Not_Sun_Exposed_Suprapubic	1	ENSG00000008838	MED24	mediator complex subunit 24
2904	17_37234482_38234482	All_African_meta-analysis	Pituitary	1	ENSG00000008838	MED24	mediator complex subunit 24
2912	17_37234482_38234482	All_African_meta-analysis	Skin_Sun_Exposed_Lower_leg	1	ENSG00000008838	MED24	mediator complex subunit 24
2912	17_37234482_38234482	All_African_meta-analysis	Adipose_Visceral_Omentum	1	ENSG00000008838	MED24	mediator complex subunit 24
2912	17_37234482_38234482	All_African_meta-analysis	Lung	1	ENSG00000172057	ORMDL3	ORMDL sphingolipid biosynthesis regulator 3
3747	17_37234482_38234482	All_African_meta-analysis	TGP_Cell_lines	1	ENSG00000008838.20	MED24	mediator complex subunit 24
2912	17_37234482_38234482	All_African_meta-analysis	Whole_Blood	1	ENSG00000008838	MED24	mediator complex subunit 24
2912	17_37234482_38234482	All_African_meta-analysis	Nerve_Tibial	1	ENSG00000264968
2912	17_37234482_38234482	All_African_meta-analysis	Muscle_Skeletal	1	ENSG00000264968
2912	17_37234482_38234482	All_African_meta-analysis	Testis	1	ENSG00000264968
2912	17_37234482_38234482	All_African_meta-analysis	Artery_Tibial	1	ENSG00000264968
2912	17_37234482_38234482	All_African_meta-analysis	Thyroid	1	ENSG00000264968
2747	17_37234482_38234482	All_African_meta-analysis	Skin_Sun_Exposed_Lower_leg	1	ENSG00000266588
2747	17_37234482_38234482	All_African_meta-analysis	Skin_Not_Sun_Exposed_Suprapubic	1	ENSG00000266588
2796	17_37234482_38234482	All_African_meta-analysis	Skin_Not_Sun_Exposed_Suprapubic	1	ENSG00000214553	LRRC37A11P
2796	17_37234482_38234482	All_African_meta-analysis	Skin_Sun_Exposed_Lower_leg	1	ENSG00000214553	LRRC37A11P
2912	17_37234482_38234482	All_African_meta-analysis	Colon_Sigmoid	1	ENSG00000008838	MED24	mediator complex subunit 24
2912	17_37234482_38234482	All_African_meta-analysis	Breast_Mammary_Tissue	1	ENSG00000008838	MED24	mediator complex subunit 24
3242	15_44721609_45721609	All_African_meta-analysis	Colon_Sigmoid	1	ENSG00000259433
3747	17_37234482_38234482	All_African_meta-analysis	TGP_Cell_lines	1	ENSG00000172057.10	ORMDL3	ORMDL sphingolipid biosynthesis regulator 3
2912	17_37234482_38234482	All_African_meta-analysis	Skin_Sun_Exposed_Lower_leg	1	ENSG00000141750	STAC2	SH3 and cysteine rich domain 2
2912	17_37234482_38234482	All_African_meta-analysis	Esophagus_Muscularis	1	ENSG00000264968
2909	17_37234482_38234482	All_African_meta-analysis	Ovary	1	ENSG00000008838	MED24	mediator complex subunit 24
3056	15_45639843_46639843	All_African_meta-analysis	Pituitary	1	ENSG00000137860	SLC28A2	solute carrier family 28 member 2
2912	17_37234482_38234482	All_African_meta-analysis	Lung	1	ENSG00000161395	PGAP3	post-GPI attachment to proteins phospholipase 3
3565	17_37234482_38234482	All_African_meta-analysis	Tube.NephQTL2	1	ENSG00000161395	PGAP3	post-GPI attachment to proteins phospholipase 3
2912	17_37234482_38234482	All_African_meta-analysis	Adipose_Subcutaneous	1	ENSG00000264968
2912	17_37234482_38234482	All_African_meta-analysis	Whole_Blood	1	ENSG00000172057	ORMDL3	ORMDL sphingolipid biosynthesis regulator 3
2912	17_37234482_38234482	All_African_meta-analysis	Spleen	1	ENSG00000172057	ORMDL3	ORMDL sphingolipid biosynthesis regulator 3
2912	17_37234482_38234482	All_African_meta-analysis	Spleen	1	ENSG00000073605	GSDMB	gasdermin B
2909	17_37234482_38234482	All_African_meta-analysis	Cells_EBV-transformed_lymphocytes	1	ENSG00000172057	ORMDL3	ORMDL sphingolipid biosynthesis regulator 3
2912	17_37234482_38234482	All_African_meta-analysis	Whole_Blood	1	ENSG00000131748	STARD3	StAR related lipid transfer domain containing 3
2912	17_37234482_38234482	All_African_meta-analysis	Whole_Blood	1	ENSG00000167914	GSDMA	gasdermin A
2912	17_37234482_38234482	All_African_meta-analysis	Nerve_Tibial	1	ENSG00000161395	PGAP3	post-GPI attachment to proteins phospholipase 3
2912	17_37234482_38234482	All_African_meta-analysis	Thyroid	1	ENSG00000161395	PGAP3	post-GPI attachment to proteins phospholipase 3
2912	17_37234482_38234482	All_African_meta-analysis	Heart_Atrial_Appendage	1	ENSG00000161395	PGAP3	post-GPI attachment to proteins phospholipase 3
2912	17_37234482_38234482	All_African_meta-analysis	Heart_Left_Ventricle	1	ENSG00000161395	PGAP3	post-GPI attachment to proteins phospholipase 3
2912	17_37234482_38234482	All_African_meta-analysis	Skin_Not_Sun_Exposed_Suprapubic	1	ENSG00000161395	PGAP3	post-GPI attachment to proteins phospholipase 3
2912	17_37234482_38234482	All_African_meta-analysis	Skin_Sun_Exposed_Lower_leg	1	ENSG00000161395	PGAP3	post-GPI attachment to proteins phospholipase 3
2912	17_37234482_38234482	All_African_meta-analysis	Whole_Blood	1	ENSG00000073605	GSDMB	gasdermin B
2912	17_37234482_38234482	All_African_meta-analysis	Pancreas	1	ENSG00000161395	PGAP3	post-GPI attachment to proteins phospholipase 3
2912	17_37234482_38234482	All_African_meta-analysis	Liver	1	ENSG00000161395	PGAP3	post-GPI attachment to proteins phospholipase 3
2912	17_37234482_38234482	All_African_meta-analysis	Stomach	1	ENSG00000161395	PGAP3	post-GPI attachment to proteins phospholipase 3
3747	17_37234482_38234482	All_African_meta-analysis	TGP_Cell_lines	1	ENSG00000073605.19	GSDMB	gasdermin B
3242	15_44721609_45721609	All_African_meta-analysis	Stomach	1	ENSG00000137860	SLC28A2	solute carrier family 28 member 2
2912	17_37234482_38234482	All_African_meta-analysis	Lung	1	ENSG00000073605	GSDMB	gasdermin B
2912	17_37234482_38234482	All_African_meta-analysis	Esophagus_Muscularis	1	ENSG00000161395	PGAP3	post-GPI attachment to proteins phospholipase 3
2912	17_37234482_38234482	All_African_meta-analysis	Adipose_Visceral_Omentum	1	ENSG00000161395	PGAP3	post-GPI attachment to proteins phospholipase 3
2912	17_37234482_38234482	All_African_meta-analysis	Colon_Transverse	1	ENSG00000161395	PGAP3	post-GPI attachment to proteins phospholipase 3
2904	17_37234482_38234482	All_African_meta-analysis	Small_Intestine_Terminal_Ileum	1	ENSG00000073605	GSDMB	gasdermin B
2469	17_37234482_38234482	All_African_meta-analysis	Whole_Blood	1	ENSG00000108352	RAPGEFL1	Rap guanine nucleotide exchange factor like 1
3330	15_45639843_46639843	All_African_meta-analysis	Muscle_Skeletal	1	ENSG00000259433
3140	15_45639843_46639843	All_African_meta-analysis	Ovary	1	ENSG00000259520	SLC28A2-AS1
2912	17_37234482_38234482	All_African_meta-analysis	Muscle_Skeletal	1	ENSG00000161395	PGAP3	post-GPI attachment to proteins phospholipase 3
2912	17_37234482_38234482	All_African_meta-analysis	Lung	1	ENSG00000008838	MED24	mediator complex subunit 24
2912	17_37234482_38234482	All_African_meta-analysis	Cells_Cultured_fibroblasts	1	ENSG00000008838	MED24	mediator complex subunit 24
3565	17_37234482_38234482	All_African_meta-analysis	Tube.NephQTL2	1	ENSG00000167914	GSDMA	gasdermin A
3330	15_45639843_46639843	All_African_meta-analysis	Colon_Sigmoid	1	ENSG00000259433
2912	17_37234482_38234482	All_African_meta-analysis	Esophagus_Mucosa	1	ENSG00000131771	PPP1R1B	protein phosphatase 1 regulatory inhibitor subunit 1B
2901	17_37234482_38234482	All_African_meta-analysis	Minor_Salivary_Gland	1	ENSG00000167914	GSDMA	gasdermin A
2912	17_37234482_38234482	All_African_meta-analysis	Spleen	1	ENSG00000008838	MED24	mediator complex subunit 24
3242	15_44721609_45721609	All_African_meta-analysis	Colon_Transverse	1	ENSG00000259433
3242	15_44721609_45721609	All_African_meta-analysis	Colon_Sigmoid	1	ENSG00000171763	AFG2B	AFG2 AAA ATPase homolog B
2912	17_37234482_38234482	All_African_meta-analysis	Colon_Transverse	1	ENSG00000073605	GSDMB	gasdermin B
3242	15_44721609_45721609	All_African_meta-analysis	Esophagus_Gastroesophageal_Junction	1	ENSG00000259479	SORD2P
3382	15_45639843_46639843	All_African_meta-analysis	Colon_Sigmoid	1	ENSG00000171763	AFG2B	AFG2 AAA ATPase homolog B
2912	17_37234482_38234482	All_African_meta-analysis	Skin_Sun_Exposed_Lower_leg	1	ENSG00000172057	ORMDL3	ORMDL sphingolipid biosynthesis regulator 3
3241	15_44721609_45721609	All_African_meta-analysis	Brain_Nucleus_accumbens_basal_ganglia	1	ENSG00000259539
3242	15_44721609_45721609	All_African_meta-analysis	Whole_Blood	1	ENSG00000185880	TRIM69	tripartite motif containing 69
2469	17_37234482_38234482	All_African_meta-analysis	Adipose_Subcutaneous	1	ENSG00000108352	RAPGEFL1	Rap guanine nucleotide exchange factor like 1
3056	15_45639843_46639843	All_African_meta-analysis	Esophagus_Gastroesophageal_Junction	1	ENSG00000137860	SLC28A2	solute carrier family 28 member 2
3242	15_44721609_45721609	All_African_meta-analysis	Spleen	1	ENSG00000171763	AFG2B	AFG2 AAA ATPase homolog B
2912	17_37234482_38234482	All_African_meta-analysis	Spleen	1	ENSG00000167914	GSDMA	gasdermin A
3382	15_45639843_46639843	All_African_meta-analysis	Spleen	1	ENSG00000171763	AFG2B	AFG2 AAA ATPase homolog B
3242	15_44721609_45721609	All_African_meta-analysis	Lung	1	ENSG00000259539
3242	15_44721609_45721609	All_African_meta-analysis	Breast_Mammary_Tissue	1	ENSG00000171763	AFG2B	AFG2 AAA ATPase homolog B
3242	15_44721609_45721609	All_African_meta-analysis	Pancreas	1	ENSG00000259479	SORD2P
3382	15_45639843_46639843	All_African_meta-analysis	Breast_Mammary_Tissue	1	ENSG00000171763	AFG2B	AFG2 AAA ATPase homolog B
2912	17_37234482_38234482	All_African_meta-analysis	Skin_Sun_Exposed_Lower_leg	1	ENSG00000167914	GSDMA	gasdermin A
3056	15_45639843_46639843	All_African_meta-analysis	Colon_Transverse	1	ENSG00000137860	SLC28A2	solute carrier family 28 member 2
3138	15_45639843_46639843	All_African_meta-analysis	Uterus	1	ENSG00000259520	SLC28A2-AS1
2469	17_37234482_38234482	All_African_meta-analysis	Thyroid	1	ENSG00000108352	RAPGEFL1	Rap guanine nucleotide exchange factor like 1
6959	11_4707604_5707604	All_African_meta-analysis	Tube.NephQTL2	1	ENSG00000132256	TRIM5	tripartite motif containing 5
2912	17_37234482_38234482	All_African_meta-analysis	Pancreas	1	ENSG00000167914	GSDMA	gasdermin A
2747	17_37234482_38234482	All_African_meta-analysis	Esophagus_Mucosa	1	ENSG00000266588
4072	15_45639843_46639843	All_African_meta-analysis	Tube.NephQTL2	1	ENSG00000104154	SLC30A4	solute carrier family 30 member 4
2904	17_37234482_38234482	All_African_meta-analysis	Pituitary	1	ENSG00000161395	PGAP3	post-GPI attachment to proteins phospholipase 3
3241	15_44721609_45721609	All_African_meta-analysis	Cells_EBV-transformed_lymphocytes	1	ENSG00000259520	SLC28A2-AS1
2912	17_37234482_38234482	All_African_meta-analysis	Cells_Cultured_fibroblasts	1	ENSG00000131748	STARD3	StAR related lipid transfer domain containing 3
3241	15_44721609_45721609	All_African_meta-analysis	Small_Intestine_Terminal_Ileum	1	ENSG00000259520	SLC28A2-AS1
2912	17_37234482_38234482	All_African_meta-analysis	Esophagus_Gastroesophageal_Junction	1	ENSG00000264968
3321	15_45639843_46639843	All_African_meta-analysis	Brain_Amygdala	1	ENSG00000259433
3220	15_44721609_45721609	All_African_meta-analysis	Brain_Amygdala	1	ENSG00000259433
2912	17_37234482_38234482	All_African_meta-analysis	Skin_Sun_Exposed_Lower_leg	1	ENSG00000161381	PLXDC1	plexin domain containing 1
3233	15_44721609_45721609	All_African_meta-analysis	Vagina	1	ENSG00000259479	SORD2P
3242	15_44721609_45721609	All_African_meta-analysis	Esophagus_Mucosa	1	ENSG00000140263	SORD	sorbitol dehydrogenase
3056	15_45639843_46639843	All_African_meta-analysis	Esophagus_Muscularis	1	ENSG00000137860	SLC28A2	solute carrier family 28 member 2
2731	15_45639843_46639843	All_African_meta-analysis	Artery_Tibial	1	ENSG00000259539
2909	17_37234482_38234482	All_African_meta-analysis	Cells_EBV-transformed_lymphocytes	1	ENSG00000073605	GSDMB	gasdermin B
3325	17_37234482_38234482	All_African_meta-analysis	Tube.NephQTL2	1	ENSG00000266588
3565	17_37234482_38234482	All_African_meta-analysis	Tube.NephQTL2	1	ENSG00000263818	RDM1P5
2891	17_37234482_38234482	All_African_meta-analysis	Brain_Substantia_nigra	1	ENSG00000167914	GSDMA	gasdermin A
3328	15_45639843_46639843	All_African_meta-analysis	Brain_Frontal_Cortex_BA9	1	ENSG00000259433
3139	15_45639843_46639843	All_African_meta-analysis	Minor_Salivary_Gland	1	ENSG00000259520	SLC28A2-AS1
3131	15_45639843_46639843	All_African_meta-analysis	Brain_Hypothalamus	1	ENSG00000259520	SLC28A2-AS1
3242	15_44721609_45721609	All_African_meta-analysis	Skin_Not_Sun_Exposed_Suprapubic	1	ENSG00000140279	DUOX2	dual oxidase 2
3238	15_44721609_45721609	All_African_meta-analysis	Brain_Frontal_Cortex_BA9	1	ENSG00000259433
7298	11_4707604_5707604	All_African_meta-analysis	Glom.NephQTL2	1	ENSG00000121236	TRIM6	tripartite motif containing 6
3242	15_44721609_45721609	All_African_meta-analysis	Spleen	1	ENSG00000137860	SLC28A2	solute carrier family 28 member 2
3330	15_45639843_46639843	All_African_meta-analysis	Colon_Transverse	1	ENSG00000259433
3241	15_44721609_45721609	All_African_meta-analysis	Brain_Cerebellum	1	ENSG00000137860	SLC28A2	solute carrier family 28 member 2
3382	15_45639843_46639843	All_African_meta-analysis	Artery_Tibial	1	ENSG00000171763	AFG2B	AFG2 AAA ATPase homolog B
3242	15_44721609_45721609	All_African_meta-analysis	Artery_Tibial	1	ENSG00000171763	AFG2B	AFG2 AAA ATPase homolog B
2912	17_37234482_38234482	All_African_meta-analysis	Pancreas	1	ENSG00000008838	MED24	mediator complex subunit 24
2904	17_37234482_38234482	All_African_meta-analysis	Small_Intestine_Terminal_Ileum	1	ENSG00000167914	GSDMA	gasdermin A
3242	15_44721609_45721609	All_African_meta-analysis	Skin_Not_Sun_Exposed_Suprapubic	1	ENSG00000137857	DUOX1	dual oxidase 1
3174	15_44721609_45721609	All_African_meta-analysis	Brain_Anterior_cingulate_cortex_BA24	1	ENSG00000259433
2912	17_37234482_38234482	All_African_meta-analysis	Artery_Aorta	1	ENSG00000141750	STAC2	SH3 and cysteine rich domain 2
2911	17_37234482_38234482	All_African_meta-analysis	Brain_Frontal_Cortex_BA9	1	ENSG00000008838	MED24	mediator complex subunit 24
3241	15_44721609_45721609	All_African_meta-analysis	Adrenal_Gland	1	ENSG00000259479	SORD2P
3242	15_44721609_45721609	All_African_meta-analysis	Testis	1	ENSG00000259479	SORD2P
3323	15_45639843_46639843	All_African_meta-analysis	Brain_Anterior_cingulate_cortex_BA24	1	ENSG00000259433
2584	15_75713980_76713980	All_African_meta-analysis	Whole_Blood	1	ENSG00000159556	ISL2	ISL LIM homeobox 2
3427	15_75713980_76713980	All_African_meta-analysis	TGP_Cell_lines	1	ENSG00000260269.5
2583	15_75713980_76713980	All_African_meta-analysis	Brain_Frontal_Cortex_BA9	1	ENSG00000169752	NRG4	neuregulin 4
2582	15_75713980_76713980	All_African_meta-analysis	Brain_Hypothalamus	1	ENSG00000169752	NRG4	neuregulin 4
2584	15_75713980_76713980	All_African_meta-analysis	Brain_Caudate_basal_ganglia	1	ENSG00000169752	NRG4	neuregulin 4
2582	15_75713980_76713980	All_African_meta-analysis	Brain_Cortex	1	ENSG00000169752	NRG4	neuregulin 4
2584	15_75713980_76713980	All_African_meta-analysis	Whole_Blood	1	ENSG00000140374	ETFA	electron transfer flavoprotein subunit alpha
2582	15_75713980_76713980	All_African_meta-analysis	Pituitary	1	ENSG00000169752	NRG4	neuregulin 4
3427	15_75713980_76713980	All_African_meta-analysis	TGP_Cell_lines	1	ENSG00000169371.14	SNUPN	snurportin 1
2413	15_75713980_76713980	All_African_meta-analysis	Cells_Cultured_fibroblasts	1	ENSG00000140398	NEIL1	nei like DNA glycosylase 1
2584	15_75713980_76713980	All_African_meta-analysis	Lung	1	ENSG00000169758	TMEM266	transmembrane protein 266
2584	15_75713980_76713980	All_African_meta-analysis	Skin_Sun_Exposed_Lower_leg	1	ENSG00000259422		uncharacterized LOC101929439
2948	15_75713980_76713980	All_African_meta-analysis	Tube.NephQTL2	1	ENSG00000140400	MAN2C1	mannosidase alpha class 2C member 1
2582	15_75713980_76713980	All_African_meta-analysis	Pituitary	1	ENSG00000259422		uncharacterized LOC101929439
2581	15_75713980_76713980	All_African_meta-analysis	Brain_Cerebellum	1	ENSG00000169371	SNUPN	snurportin 1
3427	15_75713980_76713980	All_African_meta-analysis	TGP_Cell_lines	1	ENSG00000177971.9	IMP3	IMP U3 small nucleolar ribonucleoprotein 3
2584	15_75713980_76713980	All_African_meta-analysis	Testis	1	ENSG00000169371	SNUPN	snurportin 1
2584	15_75713980_76713980	All_African_meta-analysis	Lung	1	ENSG00000259422		uncharacterized LOC101929439
2583	15_75713980_76713980	All_African_meta-analysis	Liver	1	ENSG00000259422		uncharacterized LOC101929439
2584	15_75713980_76713980	All_African_meta-analysis	Whole_Blood	1	ENSG00000169371	SNUPN	snurportin 1
2584	15_75713980_76713980	All_African_meta-analysis	Esophagus_Mucosa	1	ENSG00000259422		uncharacterized LOC101929439
2584	15_75713980_76713980	All_African_meta-analysis	Adipose_Visceral_Omentum	1	ENSG00000259422		uncharacterized LOC101929439
2584	15_75713980_76713980	All_African_meta-analysis	Colon_Sigmoid	1	ENSG00000259422		uncharacterized LOC101929439
2584	15_75713980_76713980	All_African_meta-analysis	Colon_Transverse	1	ENSG00000259422		uncharacterized LOC101929439
2584	15_75713980_76713980	All_African_meta-analysis	Breast_Mammary_Tissue	1	ENSG00000259422		uncharacterized LOC101929439
2584	15_75713980_76713980	All_African_meta-analysis	Spleen	1	ENSG00000259422		uncharacterized LOC101929439
2584	15_75713980_76713980	All_African_meta-analysis	Prostate	1	ENSG00000259422		uncharacterized LOC101929439
2584	15_75713980_76713980	All_African_meta-analysis	Cells_Cultured_fibroblasts	1	ENSG00000169371	SNUPN	snurportin 1
2584	15_75713980_76713980	All_African_meta-analysis	Artery_Aorta	1	ENSG00000259422		uncharacterized LOC101929439
2583	15_75713980_76713980	All_African_meta-analysis	Stomach	1	ENSG00000259422		uncharacterized LOC101929439
2464	15_75713980_76713980	All_African_meta-analysis	Skin_Not_Sun_Exposed_Suprapubic	1	ENSG00000260274
2385	15_75713980_76713980	All_African_meta-analysis	Skin_Sun_Exposed_Lower_leg	1	ENSG00000140365	COMMD4	COMM domain containing 4
2584	15_75713980_76713980	All_African_meta-analysis	Testis	1	ENSG00000173548	SNX33	sorting nexin 33
2464	15_75713980_76713980	All_African_meta-analysis	Breast_Mammary_Tissue	1	ENSG00000140400	MAN2C1	mannosidase alpha class 2C member 1
2463	15_75713980_76713980	All_African_meta-analysis	Liver	1	ENSG00000140400	MAN2C1	mannosidase alpha class 2C member 1
2464	15_75713980_76713980	All_African_meta-analysis	Spleen	1	ENSG00000140400	MAN2C1	mannosidase alpha class 2C member 1
2584	15_75713980_76713980	All_African_meta-analysis	Adipose_Subcutaneous	1	ENSG00000259422		uncharacterized LOC101929439
2584	15_75713980_76713980	All_African_meta-analysis	Testis	1	ENSG00000261043
2464	15_75713980_76713980	All_African_meta-analysis	Adrenal_Gland	1	ENSG00000140400	MAN2C1	mannosidase alpha class 2C member 1
2464	15_75713980_76713980	All_African_meta-analysis	Lung	1	ENSG00000260274
2464	15_75713980_76713980	All_African_meta-analysis	Colon_Sigmoid	1	ENSG00000260274
2464	15_75713980_76713980	All_African_meta-analysis	Cells_Cultured_fibroblasts	1	ENSG00000260274
2402	15_75713980_76713980	All_African_meta-analysis	Minor_Salivary_Gland	1	ENSG00000140400	MAN2C1	mannosidase alpha class 2C member 1
2464	15_75713980_76713980	All_African_meta-analysis	Whole_Blood	1	ENSG00000260274
2464	15_75713980_76713980	All_African_meta-analysis	Prostate	1	ENSG00000140400	MAN2C1	mannosidase alpha class 2C member 1
2462	15_75713980_76713980	All_African_meta-analysis	Small_Intestine_Terminal_Ileum	1	ENSG00000140400	MAN2C1	mannosidase alpha class 2C member 1
2463	15_75713980_76713980	All_African_meta-analysis	Uterus	1	ENSG00000140400	MAN2C1	mannosidase alpha class 2C member 1
2464	15_75713980_76713980	All_African_meta-analysis	Nerve_Tibial	1	ENSG00000260274
2464	15_75713980_76713980	All_African_meta-analysis	Lung	1	ENSG00000140400	MAN2C1	mannosidase alpha class 2C member 1
2464	15_75713980_76713980	All_African_meta-analysis	Colon_Transverse	1	ENSG00000140400	MAN2C1	mannosidase alpha class 2C member 1
2440	15_75713980_76713980	All_African_meta-analysis	Brain_Hippocampus	1	ENSG00000140400	MAN2C1	mannosidase alpha class 2C member 1
2464	15_75713980_76713980	All_African_meta-analysis	Esophagus_Muscularis	1	ENSG00000260274
2413	15_75713980_76713980	All_African_meta-analysis	Nerve_Tibial	1	ENSG00000140398	NEIL1	nei like DNA glycosylase 1
2462	15_75713980_76713980	All_African_meta-analysis	Brain_Cortex	1	ENSG00000140400	MAN2C1	mannosidase alpha class 2C member 1
2584	15_75713980_76713980	All_African_meta-analysis	Lung	1	ENSG00000169371	SNUPN	snurportin 1
2464	15_75713980_76713980	All_African_meta-analysis	Artery_Aorta	1	ENSG00000140400	MAN2C1	mannosidase alpha class 2C member 1
2462	15_75713980_76713980	All_African_meta-analysis	Cells_EBV-transformed_lymphocytes	1	ENSG00000140400	MAN2C1	mannosidase alpha class 2C member 1
2464	15_75713980_76713980	All_African_meta-analysis	Pancreas	1	ENSG00000140400	MAN2C1	mannosidase alpha class 2C member 1
2464	15_75713980_76713980	All_African_meta-analysis	Brain_Caudate_basal_ganglia	1	ENSG00000140400	MAN2C1	mannosidase alpha class 2C member 1
2464	15_75713980_76713980	All_African_meta-analysis	Artery_Coronary	1	ENSG00000140400	MAN2C1	mannosidase alpha class 2C member 1
3278	15_75713980_76713980	All_African_meta-analysis	TGP_Cell_lines	1	ENSG00000140400.17	MAN2C1	mannosidase alpha class 2C member 1
2464	15_75713980_76713980	All_African_meta-analysis	Heart_Left_Ventricle	1	ENSG00000140400	MAN2C1	mannosidase alpha class 2C member 1
2464	15_75713980_76713980	All_African_meta-analysis	Skin_Sun_Exposed_Lower_leg	1	ENSG00000140400	MAN2C1	mannosidase alpha class 2C member 1
2464	15_75713980_76713980	All_African_meta-analysis	Stomach	1	ENSG00000140400	MAN2C1	mannosidase alpha class 2C member 1
2464	15_75713980_76713980	All_African_meta-analysis	Thyroid	1	ENSG00000140400	MAN2C1	mannosidase alpha class 2C member 1
2464	15_75713980_76713980	All_African_meta-analysis	Adipose_Subcutaneous	1	ENSG00000140400	MAN2C1	mannosidase alpha class 2C member 1
2464	15_75713980_76713980	All_African_meta-analysis	Adipose_Visceral_Omentum	1	ENSG00000140400	MAN2C1	mannosidase alpha class 2C member 1
2464	15_75713980_76713980	All_African_meta-analysis	Artery_Tibial	1	ENSG00000140400	MAN2C1	mannosidase alpha class 2C member 1
2464	15_75713980_76713980	All_African_meta-analysis	Esophagus_Muscularis	1	ENSG00000140400	MAN2C1	mannosidase alpha class 2C member 1
2464	15_75713980_76713980	All_African_meta-analysis	Heart_Atrial_Appendage	1	ENSG00000140400	MAN2C1	mannosidase alpha class 2C member 1
2464	15_75713980_76713980	All_African_meta-analysis	Esophagus_Gastroesophageal_Junction	1	ENSG00000140400	MAN2C1	mannosidase alpha class 2C member 1
2464	15_75713980_76713980	All_African_meta-analysis	Whole_Blood	1	ENSG00000140400	MAN2C1	mannosidase alpha class 2C member 1
2464	15_75713980_76713980	All_African_meta-analysis	Esophagus_Mucosa	1	ENSG00000140400	MAN2C1	mannosidase alpha class 2C member 1
2464	15_75713980_76713980	All_African_meta-analysis	Colon_Sigmoid	1	ENSG00000140400	MAN2C1	mannosidase alpha class 2C member 1
2464	15_75713980_76713980	All_African_meta-analysis	Skin_Not_Sun_Exposed_Suprapubic	1	ENSG00000140400	MAN2C1	mannosidase alpha class 2C member 1
2462	15_75713980_76713980	All_African_meta-analysis	Pituitary	1	ENSG00000140400	MAN2C1	mannosidase alpha class 2C member 1
2464	15_75713980_76713980	All_African_meta-analysis	Cells_Cultured_fibroblasts	1	ENSG00000140400	MAN2C1	mannosidase alpha class 2C member 1
2464	15_75713980_76713980	All_African_meta-analysis	Nerve_Tibial	1	ENSG00000140400	MAN2C1	mannosidase alpha class 2C member 1
2464	15_75713980_76713980	All_African_meta-analysis	Adipose_Subcutaneous	1	ENSG00000260274
2464	15_75713980_76713980	All_African_meta-analysis	Testis	1	ENSG00000140400	MAN2C1	mannosidase alpha class 2C member 1
2464	15_75713980_76713980	All_African_meta-analysis	Spleen	1	ENSG00000260274
2584	15_75713980_76713980	All_African_meta-analysis	Skin_Not_Sun_Exposed_Suprapubic	1	ENSG00000259422		uncharacterized LOC101929439
2464	15_75713980_76713980	All_African_meta-analysis	Skin_Sun_Exposed_Lower_leg	1	ENSG00000260274
2462	15_75713980_76713980	All_African_meta-analysis	Brain_Hypothalamus	1	ENSG00000140400	MAN2C1	mannosidase alpha class 2C member 1
2464	15_75713980_76713980	All_African_meta-analysis	Breast_Mammary_Tissue	1	ENSG00000260274
2584	15_75713980_76713980	All_African_meta-analysis	Adipose_Visceral_Omentum	1	ENSG00000169371	SNUPN	snurportin 1
2461	15_75713980_76713980	All_African_meta-analysis	Brain_Cerebellum	1	ENSG00000140400	MAN2C1	mannosidase alpha class 2C member 1
2464	15_75713980_76713980	All_African_meta-analysis	Thyroid	1	ENSG00000260274
2464	15_75713980_76713980	All_African_meta-analysis	Esophagus_Mucosa	1	ENSG00000260274
2462	15_75713980_76713980	All_African_meta-analysis	Brain_Putamen_basal_ganglia	1	ENSG00000140400	MAN2C1	mannosidase alpha class 2C member 1
2584	15_75713980_76713980	All_African_meta-analysis	Pancreas	1	ENSG00000259422		uncharacterized LOC101929439
2464	15_75713980_76713980	All_African_meta-analysis	Muscle_Skeletal	1	ENSG00000140400	MAN2C1	mannosidase alpha class 2C member 1
2464	15_75713980_76713980	All_African_meta-analysis	Artery_Aorta	1	ENSG00000260274
2449	15_75713980_76713980	All_African_meta-analysis	Brain_Spinal_cord_cervical_c-1	1	ENSG00000140400	MAN2C1	mannosidase alpha class 2C member 1
2584	15_75713980_76713980	All_African_meta-analysis	Muscle_Skeletal	1	ENSG00000259422		uncharacterized LOC101929439
2584	15_75713980_76713980	All_African_meta-analysis	Nerve_Tibial	1	ENSG00000169371	SNUPN	snurportin 1
2584	15_75713980_76713980	All_African_meta-analysis	Thyroid	1	ENSG00000259422		uncharacterized LOC101929439
2584	15_75713980_76713980	All_African_meta-analysis	Esophagus_Muscularis	1	ENSG00000259422		uncharacterized LOC101929439
2584	15_75713980_76713980	All_African_meta-analysis	Esophagus_Muscularis	1	ENSG00000169371	SNUPN	snurportin 1
2464	15_75713980_76713980	All_African_meta-analysis	Esophagus_Gastroesophageal_Junction	1	ENSG00000260274
2463	15_75713980_76713980	All_African_meta-analysis	Ovary	1	ENSG00000140400	MAN2C1	mannosidase alpha class 2C member 1
2464	15_75713980_76713980	All_African_meta-analysis	Colon_Transverse	1	ENSG00000260274
2584	15_75713980_76713980	All_African_meta-analysis	Esophagus_Gastroesophageal_Junction	1	ENSG00000259422		uncharacterized LOC101929439
2464	15_75713980_76713980	All_African_meta-analysis	Artery_Tibial	1	ENSG00000260274
2459	15_75713980_76713980	All_African_meta-analysis	Vagina	1	ENSG00000140400	MAN2C1	mannosidase alpha class 2C member 1
2584	15_75713980_76713980	All_African_meta-analysis	Skin_Sun_Exposed_Lower_leg	1	ENSG00000140374	ETFA	electron transfer flavoprotein subunit alpha
2464	15_75713980_76713980	All_African_meta-analysis	Adipose_Visceral_Omentum	1	ENSG00000260274
2462	15_75713980_76713980	All_African_meta-analysis	Small_Intestine_Terminal_Ileum	1	ENSG00000260274
2584	15_75713980_76713980	All_African_meta-analysis	Skin_Sun_Exposed_Lower_leg	1	ENSG00000203392
2464	15_75713980_76713980	All_African_meta-analysis	Prostate	1	ENSG00000260274
2584	15_75713980_76713980	All_African_meta-analysis	Brain_Caudate_basal_ganglia	1	ENSG00000169371	SNUPN	snurportin 1
2584	15_75713980_76713980	All_African_meta-analysis	Heart_Left_Ventricle	1	ENSG00000169371	SNUPN	snurportin 1
2584	15_75713980_76713980	All_African_meta-analysis	Thyroid	1	ENSG00000169375	SIN3A	SIN3 transcription regulator family member A
2584	15_75713980_76713980	All_African_meta-analysis	Skin_Not_Sun_Exposed_Suprapubic	1	ENSG00000140374	ETFA	electron transfer flavoprotein subunit alpha
2584	15_75713980_76713980	All_African_meta-analysis	Adipose_Subcutaneous	1	ENSG00000169371	SNUPN	snurportin 1
2464	15_75713980_76713980	All_African_meta-analysis	Brain_Nucleus_accumbens_basal_ganglia	1	ENSG00000140400	MAN2C1	mannosidase alpha class 2C member 1
2584	15_75713980_76713980	All_African_meta-analysis	Brain_Cerebellar_Hemisphere	1	ENSG00000169371	SNUPN	snurportin 1
2584	15_75713980_76713980	All_African_meta-analysis	Cells_Cultured_fibroblasts	1	ENSG00000167196	FBXO22	F-box protein 22
2582	15_75713980_76713980	All_African_meta-analysis	Pituitary	1	ENSG00000169371	SNUPN	snurportin 1
3239	15_44721609_45721609	All_African_meta-analysis	Brain_Cerebellar_Hemisphere	1	ENSG00000138606	SHF	Src homology 2 domain containing F
3242	15_44721609_45721609	All_African_meta-analysis	Adipose_Subcutaneous	1	ENSG00000171763	AFG2B	AFG2 AAA ATPase homolog B
2578	15_75713980_76713980	All_African_meta-analysis	Brain_Anterior_cingulate_cortex_BA24	1	ENSG00000169752	NRG4	neuregulin 4
2584	15_75713980_76713980	All_African_meta-analysis	Heart_Atrial_Appendage	1	ENSG00000169371	SNUPN	snurportin 1
2584	15_75713980_76713980	All_African_meta-analysis	Thyroid	1	ENSG00000169371	SNUPN	snurportin 1
2463	15_75713980_76713980	All_African_meta-analysis	Brain_Frontal_Cortex_BA9	1	ENSG00000140400	MAN2C1	mannosidase alpha class 2C member 1
3238	15_44721609_45721609	All_African_meta-analysis	Liver	1	ENSG00000259433
2912	17_37234482_38234482	All_African_meta-analysis	Stomach	1	ENSG00000073605	GSDMB	gasdermin B
2912	17_37234482_38234482	All_African_meta-analysis	Nerve_Tibial	1	ENSG00000141736	ERBB2	erb-b2 receptor tyrosine kinase 2
2584	15_75713980_76713980	All_African_meta-analysis	Breast_Mammary_Tissue	1	ENSG00000169371	SNUPN	snurportin 1
2464	15_75713980_76713980	All_African_meta-analysis	Heart_Atrial_Appendage	1	ENSG00000260274
3141	15_45639843_46639843	All_African_meta-analysis	Colon_Transverse	1	ENSG00000259520	SLC28A2-AS1
2385	15_75713980_76713980	All_African_meta-analysis	Muscle_Skeletal	1	ENSG00000140365	COMMD4	COMM domain containing 4
3747	17_37234482_38234482	All_African_meta-analysis	TGP_Cell_lines	1	ENSG00000161405.17	IKZF3	IKAROS family zinc finger 3
2464	15_75713980_76713980	All_African_meta-analysis	Heart_Left_Ventricle	1	ENSG00000260274
2584	15_75713980_76713980	All_African_meta-analysis	Brain_Nucleus_accumbens_basal_ganglia	1	ENSG00000169371	SNUPN	snurportin 1
3747	17_37234482_38234482	All_African_meta-analysis	TGP_Cell_lines	1	ENSG00000108344.15	PSMD3	proteasome 26S subunit, non-ATPase 3
2464	15_75713980_76713980	All_African_meta-analysis	Brain_Cerebellar_Hemisphere	1	ENSG00000140400	MAN2C1	mannosidase alpha class 2C member 1
2369	17_37234482_38234482	All_African_meta-analysis	Heart_Atrial_Appendage	1	ENSG00000263874	LASP1NB	LASP1 neighbor
2584	15_75713980_76713980	All_African_meta-analysis	Testis	1	ENSG00000260288		uncharacterized LOC101929408
3242	15_44721609_45721609	All_African_meta-analysis	Colon_Sigmoid	1	ENSG00000259539
3328	15_45639843_46639843	All_African_meta-analysis	Liver	1	ENSG00000259433
6959	11_4707604_5707604	All_African_meta-analysis	Tube.NephQTL2	1	ENSG00000258659	TRIM34	tripartite motif containing 34
2385	15_75713980_76713980	All_African_meta-analysis	Skin_Not_Sun_Exposed_Suprapubic	1	ENSG00000140365	COMMD4	COMM domain containing 4
2911	17_37234482_38234482	All_African_meta-analysis	Artery_Coronary	1	ENSG00000008838	MED24	mediator complex subunit 24
2912	17_37234482_38234482	All_African_meta-analysis	Adrenal_Gland	1	ENSG00000008838	MED24	mediator complex subunit 24
3242	15_44721609_45721609	All_African_meta-analysis	Esophagus_Mucosa	1	ENSG00000259539
2731	15_45639843_46639843	All_African_meta-analysis	Skin_Not_Sun_Exposed_Suprapubic	1	ENSG00000259539
2385	15_75713980_76713980	All_African_meta-analysis	Adipose_Subcutaneous	1	ENSG00000140365	COMMD4	COMM domain containing 4
3382	15_45639843_46639843	All_African_meta-analysis	Adipose_Subcutaneous	1	ENSG00000171763	AFG2B	AFG2 AAA ATPase homolog B
2584	15_75713980_76713980	All_African_meta-analysis	Skin_Not_Sun_Exposed_Suprapubic	1	ENSG00000169371	SNUPN	snurportin 1
2912	17_37234482_38234482	All_African_meta-analysis	Whole_Blood	1	ENSG00000161405	IKZF3	IKAROS family zinc finger 3
3090	15_75713980_76713980	All_African_meta-analysis	Tube.NephQTL2	1	ENSG00000260269
3055	15_45639843_46639843	All_African_meta-analysis	Ovary	1	ENSG00000137860	SLC28A2	solute carrier family 28 member 2
2413	15_75713980_76713980	All_African_meta-analysis	Artery_Aorta	1	ENSG00000140398	NEIL1	nei like DNA glycosylase 1
2584	15_75713980_76713980	All_African_meta-analysis	Adrenal_Gland	1	ENSG00000259422		uncharacterized LOC101929439
1250	15_75713980_76713980	All_African_meta-analysis	Artery_Tibial	1	ENSG00000178718	RPP25	ribonuclease P and MRP subunit p25
3141	15_45639843_46639843	All_African_meta-analysis	Esophagus_Mucosa	1	ENSG00000259520	SLC28A2-AS1
3850	15_44721609_45721609	All_African_meta-analysis	Tube.NephQTL2	1	ENSG00000140263	SORD	sorbitol dehydrogenase
2912	17_37234482_38234482	All_African_meta-analysis	Prostate	1	ENSG00000008838	MED24	mediator complex subunit 24
2584	15_75713980_76713980	All_African_meta-analysis	Esophagus_Gastroesophageal_Junction	1	ENSG00000169371	SNUPN	snurportin 1
2731	15_45639843_46639843	All_African_meta-analysis	Adipose_Subcutaneous	1	ENSG00000259539
3140	15_45639843_46639843	All_African_meta-analysis	Brain_Caudate_basal_ganglia	1	ENSG00000259520	SLC28A2-AS1
2584	15_75713980_76713980	All_African_meta-analysis	Muscle_Skeletal	1	ENSG00000169371	SNUPN	snurportin 1
2912	17_37234482_38234482	All_African_meta-analysis	Esophagus_Mucosa	0.999999	ENSG00000008838	MED24	mediator complex subunit 24
3141	15_45639843_46639843	All_African_meta-analysis	Testis	0.999999	ENSG00000259520	SLC28A2-AS1
2912	17_37234482_38234482	All_African_meta-analysis	Heart_Atrial_Appendage	0.999999	ENSG00000141744	PNMT	phenylethanolamine N-methyltransferase
2385	15_75713980_76713980	All_African_meta-analysis	Thyroid	0.999999	ENSG00000140365	COMMD4	COMM domain containing 4
2584	15_75713980_76713980	All_African_meta-analysis	Adipose_Subcutaneous	0.999999	ENSG00000203392
3242	15_44721609_45721609	All_African_meta-analysis	Thyroid	0.999999	ENSG00000140263	SORD	sorbitol dehydrogenase
2584	15_75713980_76713980	All_African_meta-analysis	Nerve_Tibial	0.999999	ENSG00000169410	PTPN9	protein tyrosine phosphatase non-receptor type 9
2912	17_37234482_38234482	All_African_meta-analysis	Heart_Atrial_Appendage	0.999999	ENSG00000131771	PPP1R1B	protein phosphatase 1 regulatory inhibitor subunit 1B
3056	15_45639843_46639843	All_African_meta-analysis	Artery_Aorta	0.999999	ENSG00000137860	SLC28A2	solute carrier family 28 member 2
3062	15_45639843_46639843	All_African_meta-analysis	Brain_Spinal_cord_cervical_c-1	0.999999	ENSG00000259520	SLC28A2-AS1
2469	17_37234482_38234482	All_African_meta-analysis	Artery_Tibial	0.999999	ENSG00000108352	RAPGEFL1	Rap guanine nucleotide exchange factor like 1
2912	17_37234482_38234482	All_African_meta-analysis	Skin_Not_Sun_Exposed_Suprapubic	0.999999	ENSG00000161381	PLXDC1	plexin domain containing 1
3232	15_44721609_45721609	All_African_meta-analysis	Brain_Hypothalamus	0.999999	ENSG00000259433
2584	15_75713980_76713980	All_African_meta-analysis	Cells_Cultured_fibroblasts	0.999999	ENSG00000140367	UBE2Q2	ubiquitin conjugating enzyme E2 Q2
4445	15_44721609_45721609	All_African_meta-analysis	TGP_Cell_lines	0.999999	ENSG00000171763.20	AFG2B	AFG2 AAA ATPase homolog B
2385	15_75713980_76713980	All_African_meta-analysis	Artery_Tibial	0.999999	ENSG00000140365	COMMD4	COMM domain containing 4
2560	15_75713980_76713980	All_African_meta-analysis	Brain_Hippocampus	0.999999	ENSG00000169752	NRG4	neuregulin 4
3242	15_44721609_45721609	All_African_meta-analysis	Stomach	0.999999	ENSG00000171763	AFG2B	AFG2 AAA ATPase homolog B
3320	15_45639843_46639843	All_African_meta-analysis	Brain_Hypothalamus	0.999999	ENSG00000259433
3242	15_44721609_45721609	All_African_meta-analysis	Thyroid	0.999999	ENSG00000171766	GATM	glycine amidinotransferase
2912	17_37234482_38234482	All_African_meta-analysis	Adipose_Subcutaneous	0.999999	ENSG00000161395	PGAP3	post-GPI attachment to proteins phospholipase 3
2584	15_75713980_76713980	All_African_meta-analysis	Brain_Nucleus_accumbens_basal_ganglia	0.999999	ENSG00000169752	NRG4	neuregulin 4
2581	15_75713980_76713980	All_African_meta-analysis	Brain_Cerebellum	0.999999	ENSG00000169752	NRG4	neuregulin 4
2584	15_75713980_76713980	All_African_meta-analysis	Brain_Cerebellar_Hemisphere	0.999999	ENSG00000169752	NRG4	neuregulin 4
2584	15_75713980_76713980	All_African_meta-analysis	Testis	0.999999	ENSG00000169752	NRG4	neuregulin 4
2584	15_75713980_76713980	All_African_meta-analysis	Brain_Cerebellar_Hemisphere	0.999999	ENSG00000260685
2584	15_75713980_76713980	All_African_meta-analysis	Artery_Coronary	0.999999	ENSG00000259422		uncharacterized LOC101929439
3382	15_45639843_46639843	All_African_meta-analysis	Thyroid	0.999999	ENSG00000171766	GATM	glycine amidinotransferase
3382	15_45639843_46639843	All_African_meta-analysis	Stomach	0.999998	ENSG00000171763	AFG2B	AFG2 AAA ATPase homolog B
3242	15_44721609_45721609	All_African_meta-analysis	Muscle_Skeletal	0.999998	ENSG00000259539
2584	15_75713980_76713980	All_African_meta-analysis	Colon_Sigmoid	0.999998	ENSG00000169371	SNUPN	snurportin 1
4445	15_44721609_45721609	All_African_meta-analysis	TGP_Cell_lines	0.999998	ENSG00000259479.6	SORD2P
3382	15_45639843_46639843	All_African_meta-analysis	Pituitary	0.999998	ENSG00000273972
2584	15_75713980_76713980	All_African_meta-analysis	Muscle_Skeletal	0.999998	ENSG00000140374	ETFA	electron transfer flavoprotein subunit alpha
2385	15_75713980_76713980	All_African_meta-analysis	Heart_Atrial_Appendage	0.999998	ENSG00000140365	COMMD4	COMM domain containing 4
2584	15_75713980_76713980	All_African_meta-analysis	Skin_Sun_Exposed_Lower_leg	0.999998	ENSG00000196274
2469	17_37234482_38234482	All_African_meta-analysis	Adipose_Visceral_Omentum	0.999998	ENSG00000108352	RAPGEFL1	Rap guanine nucleotide exchange factor like 1
2912	17_37234482_38234482	All_African_meta-analysis	Thyroid	0.999998	ENSG00000067191	CACNB1	calcium voltage-gated channel auxiliary subunit beta 1
3242	15_44721609_45721609	All_African_meta-analysis	Pancreas	0.999998	ENSG00000259520	SLC28A2-AS1
2912	17_37234482_38234482	All_African_meta-analysis	Thyroid	0.999998	ENSG00000172057	ORMDL3	ORMDL sphingolipid biosynthesis regulator 3
2912	17_37234482_38234482	All_African_meta-analysis	Testis	0.999998	ENSG00000204913	LRRC3C	leucine rich repeat containing 3C
2584	15_75713980_76713980	All_African_meta-analysis	Brain_Cerebellar_Hemisphere	0.999998	ENSG00000246877	DNM1P35
2584	15_75713980_76713980	All_African_meta-analysis	Lung	0.999998	ENSG00000169752	NRG4	neuregulin 4
2413	15_75713980_76713980	All_African_meta-analysis	Esophagus_Muscularis	0.999998	ENSG00000140398	NEIL1	nei like DNA glycosylase 1
2584	15_75713980_76713980	All_African_meta-analysis	Muscle_Skeletal	0.999998	ENSG00000140367	UBE2Q2	ubiquitin conjugating enzyme E2 Q2
3139	15_45639843_46639843	All_African_meta-analysis	Brain_Frontal_Cortex_BA9	0.999997	ENSG00000259520	SLC28A2-AS1
3241	15_44721609_45721609	All_African_meta-analysis	Small_Intestine_Terminal_Ileum	0.999997	ENSG00000259433
2912	17_37234482_38234482	All_African_meta-analysis	Adipose_Visceral_Omentum	0.999997	ENSG00000264968
2413	15_75713980_76713980	All_African_meta-analysis	Adipose_Subcutaneous	0.999997	ENSG00000140398	NEIL1	nei like DNA glycosylase 1
6959	11_4707604_5707604	All_African_meta-analysis	Tube.NephQTL2	0.999997	ENSG00000167355	OR51B5	olfactory receptor family 51 subfamily B member 5
3242	15_44721609_45721609	All_African_meta-analysis	Artery_Aorta	0.999997	ENSG00000259433
2584	15_75713980_76713980	All_African_meta-analysis	Esophagus_Muscularis	0.999997	ENSG00000246877	DNM1P35
2469	17_37234482_38234482	All_African_meta-analysis	Artery_Aorta	0.999997	ENSG00000108352	RAPGEFL1	Rap guanine nucleotide exchange factor like 1
3242	15_44721609_45721609	All_African_meta-analysis	Adipose_Subcutaneous	0.999997	ENSG00000140263	SORD	sorbitol dehydrogenase
3132	15_45639843_46639843	All_African_meta-analysis	Brain_Amygdala	0.999996	ENSG00000259520	SLC28A2-AS1
3194	15_75713980_76713980	All_African_meta-analysis	Glom.NephQTL2	0.999996	ENSG00000169752	NRG4	neuregulin 4
2912	17_37234482_38234482	All_African_meta-analysis	Artery_Aorta	0.999996	ENSG00000161395	PGAP3	post-GPI attachment to proteins phospholipase 3
3239	15_44721609_45721609	All_African_meta-analysis	Uterus	0.999996	ENSG00000137860	SLC28A2	solute carrier family 28 member 2
2912	17_37234482_38234482	All_African_meta-analysis	Skin_Not_Sun_Exposed_Suprapubic	0.999996	ENSG00000141736	ERBB2	erb-b2 receptor tyrosine kinase 2
2912	17_37234482_38234482	All_African_meta-analysis	Esophagus_Mucosa	0.999996	ENSG00000172057	ORMDL3	ORMDL sphingolipid biosynthesis regulator 3
2584	15_75713980_76713980	All_African_meta-analysis	Thyroid	0.999996	ENSG00000173548	SNX33	sorting nexin 33
3242	15_44721609_45721609	All_African_meta-analysis	Breast_Mammary_Tissue	0.999996	ENSG00000259539
2912	17_37234482_38234482	All_African_meta-analysis	Skin_Not_Sun_Exposed_Suprapubic	0.999995	ENSG00000214546
3242	15_44721609_45721609	All_African_meta-analysis	Spleen	0.999995	ENSG00000259520	SLC28A2-AS1
3382	15_45639843_46639843	All_African_meta-analysis	Thyroid	0.999995	ENSG00000137767	SQOR	sulfide quinone oxidoreductase
3242	15_44721609_45721609	All_African_meta-analysis	Brain_Cortex	0.999995	ENSG00000138606	SHF	Src homology 2 domain containing F
3140	15_45639843_46639843	All_African_meta-analysis	Brain_Hippocampus	0.999994	ENSG00000259520	SLC28A2-AS1
3747	17_37234482_38234482	All_African_meta-analysis	TGP_Cell_lines	0.999994	ENSG00000131748.16	STARD3	StAR related lipid transfer domain containing 3
6959	11_4707604_5707604	All_African_meta-analysis	Tube.NephQTL2	0.999993	ENSG00000213931	HBE1	hemoglobin subunit epsilon 1
2584	15_75713980_76713980	All_African_meta-analysis	Esophagus_Mucosa	0.999993	ENSG00000177971	IMP3	IMP U3 small nucleolar ribonucleoprotein 3
3140	15_45639843_46639843	All_African_meta-analysis	Brain_Cerebellar_Hemisphere	0.999993	ENSG00000259520	SLC28A2-AS1
2912	17_37234482_38234482	All_African_meta-analysis	Stomach	0.999993	ENSG00000161381	PLXDC1	plexin domain containing 1
3330	15_45639843_46639843	All_African_meta-analysis	Artery_Aorta	0.999992	ENSG00000259433
3242	15_44721609_45721609	All_African_meta-analysis	Artery_Tibial	0.999992	ENSG00000171766	GATM	glycine amidinotransferase
2904	17_37234482_38234482	All_African_meta-analysis	Small_Intestine_Terminal_Ileum	0.999992	ENSG00000161395	PGAP3	post-GPI attachment to proteins phospholipase 3
2584	15_75713980_76713980	All_African_meta-analysis	Nerve_Tibial	0.999992	ENSG00000173548	SNX33	sorting nexin 33
1475	15_75713980_76713980	All_African_meta-analysis	Skin_Not_Sun_Exposed_Suprapubic	0.999992	ENSG00000140386	SCAPER	S-phase cyclin A associated protein in the ER
1474	15_75713980_76713980	All_African_meta-analysis	Stomach	0.999992	ENSG00000140386	SCAPER	S-phase cyclin A associated protein in the ER
1475	15_75713980_76713980	All_African_meta-analysis	Prostate	0.999992	ENSG00000140386	SCAPER	S-phase cyclin A associated protein in the ER
1475	15_75713980_76713980	All_African_meta-analysis	Breast_Mammary_Tissue	0.999992	ENSG00000140386	SCAPER	S-phase cyclin A associated protein in the ER
1475	15_75713980_76713980	All_African_meta-analysis	Brain_Cerebellum	0.999992	ENSG00000140386	SCAPER	S-phase cyclin A associated protein in the ER
1475	15_75713980_76713980	All_African_meta-analysis	Lung	0.999992	ENSG00000140386	SCAPER	S-phase cyclin A associated protein in the ER
1475	15_75713980_76713980	All_African_meta-analysis	Cells_Cultured_fibroblasts	0.999992	ENSG00000140386	SCAPER	S-phase cyclin A associated protein in the ER
1475	15_75713980_76713980	All_African_meta-analysis	Spleen	0.999992	ENSG00000140386	SCAPER	S-phase cyclin A associated protein in the ER
1475	15_75713980_76713980	All_African_meta-analysis	Whole_Blood	0.999992	ENSG00000140386	SCAPER	S-phase cyclin A associated protein in the ER
1475	15_75713980_76713980	All_African_meta-analysis	Colon_Transverse	0.999992	ENSG00000140386	SCAPER	S-phase cyclin A associated protein in the ER
1475	15_75713980_76713980	All_African_meta-analysis	Adipose_Subcutaneous	0.999992	ENSG00000140386	SCAPER	S-phase cyclin A associated protein in the ER
1474	15_75713980_76713980	All_African_meta-analysis	Liver	0.999992	ENSG00000140386	SCAPER	S-phase cyclin A associated protein in the ER
1475	15_75713980_76713980	All_African_meta-analysis	Skin_Sun_Exposed_Lower_leg	0.999992	ENSG00000140386	SCAPER	S-phase cyclin A associated protein in the ER
1475	15_75713980_76713980	All_African_meta-analysis	Adrenal_Gland	0.999992	ENSG00000140386	SCAPER	S-phase cyclin A associated protein in the ER
1475	15_75713980_76713980	All_African_meta-analysis	Pancreas	0.999992	ENSG00000140386	SCAPER	S-phase cyclin A associated protein in the ER
1475	15_75713980_76713980	All_African_meta-analysis	Thyroid	0.999992	ENSG00000140386	SCAPER	S-phase cyclin A associated protein in the ER
1475	15_75713980_76713980	All_African_meta-analysis	Adipose_Visceral_Omentum	0.999992	ENSG00000140386	SCAPER	S-phase cyclin A associated protein in the ER
1473	15_75713980_76713980	All_African_meta-analysis	Pituitary	0.999992	ENSG00000140386	SCAPER	S-phase cyclin A associated protein in the ER
1475	15_75713980_76713980	All_African_meta-analysis	Nerve_Tibial	0.999992	ENSG00000140386	SCAPER	S-phase cyclin A associated protein in the ER
1475	15_75713980_76713980	All_African_meta-analysis	Esophagus_Gastroesophageal_Junction	0.999992	ENSG00000140386	SCAPER	S-phase cyclin A associated protein in the ER
1475	15_75713980_76713980	All_African_meta-analysis	Muscle_Skeletal	0.999992	ENSG00000140386	SCAPER	S-phase cyclin A associated protein in the ER
1475	15_75713980_76713980	All_African_meta-analysis	Esophagus_Mucosa	0.999992	ENSG00000140386	SCAPER	S-phase cyclin A associated protein in the ER
1473	15_75713980_76713980	All_African_meta-analysis	Small_Intestine_Terminal_Ileum	0.999992	ENSG00000140386	SCAPER	S-phase cyclin A associated protein in the ER
1475	15_75713980_76713980	All_African_meta-analysis	Heart_Atrial_Appendage	0.999992	ENSG00000140386	SCAPER	S-phase cyclin A associated protein in the ER
1475	15_75713980_76713980	All_African_meta-analysis	Artery_Aorta	0.999992	ENSG00000140386	SCAPER	S-phase cyclin A associated protein in the ER
1475	15_75713980_76713980	All_African_meta-analysis	Colon_Sigmoid	0.999992	ENSG00000140386	SCAPER	S-phase cyclin A associated protein in the ER
1475	15_75713980_76713980	All_African_meta-analysis	Esophagus_Muscularis	0.999992	ENSG00000140386	SCAPER	S-phase cyclin A associated protein in the ER
1475	15_75713980_76713980	All_African_meta-analysis	Minor_Salivary_Gland	0.999992	ENSG00000140386	SCAPER	S-phase cyclin A associated protein in the ER
1475	15_75713980_76713980	All_African_meta-analysis	Artery_Tibial	0.999992	ENSG00000140386	SCAPER	S-phase cyclin A associated protein in the ER
1475	15_75713980_76713980	All_African_meta-analysis	Testis	0.999992	ENSG00000140386	SCAPER	S-phase cyclin A associated protein in the ER
2463	15_75713980_76713980	All_African_meta-analysis	Ovary	0.999992	ENSG00000260274
2912	17_37234482_38234482	All_African_meta-analysis	Adrenal_Gland	0.999992	ENSG00000161395	PGAP3	post-GPI attachment to proteins phospholipase 3
1475	15_75713980_76713980	All_African_meta-analysis	Brain_Cerebellar_Hemisphere	0.999992	ENSG00000140386	SCAPER	S-phase cyclin A associated protein in the ER
3242	15_44721609_45721609	All_African_meta-analysis	Colon_Transverse	0.999991	ENSG00000171763	AFG2B	AFG2 AAA ATPase homolog B
1475	15_75713980_76713980	All_African_meta-analysis	Heart_Left_Ventricle	0.999991	ENSG00000140386	SCAPER	S-phase cyclin A associated protein in the ER
3242	15_44721609_45721609	All_African_meta-analysis	Esophagus_Muscularis	0.999991	ENSG00000140263	SORD	sorbitol dehydrogenase
3382	15_45639843_46639843	All_African_meta-analysis	Artery_Tibial	0.999991	ENSG00000171766	GATM	glycine amidinotransferase
2582	15_75713980_76713980	All_African_meta-analysis	Brain_Putamen_basal_ganglia	0.99999	ENSG00000169752	NRG4	neuregulin 4
2912	17_37234482_38234482	All_African_meta-analysis	Stomach	0.99999	ENSG00000008838	MED24	mediator complex subunit 24
3379	15_45639843_46639843	All_African_meta-analysis	Artery_Coronary	0.99999	ENSG00000273972
3382	15_45639843_46639843	All_African_meta-analysis	Colon_Transverse	0.999989	ENSG00000171763	AFG2B	AFG2 AAA ATPase homolog B
2572	15_75713980_76713980	All_African_meta-analysis	Brain_Amygdala	0.999989	ENSG00000169752	NRG4	neuregulin 4
3319	15_45639843_46639843	All_African_meta-analysis	Small_Intestine_Terminal_Ileum	0.999989	ENSG00000259433
3564	6_160174632_161174632	All_African_meta-analysis	Cells_Cultured_fibroblasts	0.999989	ENSG00000213073	CHP1P2
3564	6_160174632_161174632	All_African_meta-analysis	Whole_Blood	0.999989	ENSG00000213073	CHP1P2
3564	6_160174632_161174632	All_African_meta-analysis	Lung	0.999989	ENSG00000146477	SLC22A3	solute carrier family 22 member 3
3564	6_160174632_161174632	All_African_meta-analysis	Testis	0.999988	ENSG00000122194	PLG	plasminogen
3564	6_160174632_161174632	All_African_meta-analysis	Skin_Sun_Exposed_Lower_leg	0.999988	ENSG00000146477	SLC22A3	solute carrier family 22 member 3
3697	17_37234482_38234482	All_African_meta-analysis	Glom.NephQTL2	0.999988	ENSG00000141744	PNMT	phenylethanolamine N-methyltransferase
2912	17_37234482_38234482	All_African_meta-analysis	Skin_Sun_Exposed_Lower_leg	0.999988	ENSG00000264968
3026	6_160174632_161174632	All_African_meta-analysis	Whole_Blood	0.999988	ENSG00000237927
4670	6_160174632_161174632	All_African_meta-analysis	TGP_Cell_lines	0.999988	ENSG00000146457.16	WTAP	WT1 associated protein
3564	6_160174632_161174632	All_African_meta-analysis	Testis	0.999988	ENSG00000120437	ACAT2	acetyl-CoA acetyltransferase 2
3564	6_160174632_161174632	All_African_meta-analysis	Colon_Transverse	0.999988	ENSG00000120438	TCP1	t-complex 1
3026	6_160174632_161174632	All_African_meta-analysis	Muscle_Skeletal	0.999988	ENSG00000237927
3564	6_160174632_161174632	All_African_meta-analysis	Adipose_Subcutaneous	0.999988	ENSG00000197081	IGF2R	insulin like growth factor 2 receptor
3564	6_160174632_161174632	All_African_meta-analysis	Muscle_Skeletal	0.999988	ENSG00000197081	IGF2R	insulin like growth factor 2 receptor
3563	6_160174632_161174632	All_African_meta-analysis	Liver	0.999988	ENSG00000243831
3459	6_160174632_161174632	All_African_meta-analysis	Adipose_Visceral_Omentum	0.999988	ENSG00000146457	WTAP	WT1 associated protein
3026	6_160174632_161174632	All_African_meta-analysis	Heart_Left_Ventricle	0.999988	ENSG00000237927
3564	6_160174632_161174632	All_African_meta-analysis	Skin_Sun_Exposed_Lower_leg	0.999988	ENSG00000112110	MRPL18	mitochondrial ribosomal protein L18
4353	6_160174632_161174632	All_African_meta-analysis	Tube.NephQTL2	0.999988	ENSG00000198670	LPA	lipoprotein(a)
3564	6_160174632_161174632	All_African_meta-analysis	Cells_Cultured_fibroblasts	0.999988	ENSG00000112110	MRPL18	mitochondrial ribosomal protein L18
3564	6_160174632_161174632	All_African_meta-analysis	Esophagus_Mucosa	0.999988	ENSG00000112110	MRPL18	mitochondrial ribosomal protein L18
3564	6_160174632_161174632	All_African_meta-analysis	Heart_Atrial_Appendage	0.999988	ENSG00000197081	IGF2R	insulin like growth factor 2 receptor
3564	6_160174632_161174632	All_African_meta-analysis	Skin_Not_Sun_Exposed_Suprapubic	0.999988	ENSG00000146477	SLC22A3	solute carrier family 22 member 3
3026	6_160174632_161174632	All_African_meta-analysis	Artery_Tibial	0.999988	ENSG00000237927
4353	6_160174632_161174632	All_African_meta-analysis	Tube.NephQTL2	0.999988	ENSG00000122194	PLG	plasminogen
3564	6_160174632_161174632	All_African_meta-analysis	Whole_Blood	0.999988	ENSG00000175003	SLC22A1	solute carrier family 22 member 1
3564	6_160174632_161174632	All_African_meta-analysis	Esophagus_Gastroesophageal_Junction	0.999988	ENSG00000112110	MRPL18	mitochondrial ribosomal protein L18
4353	6_160174632_161174632	All_African_meta-analysis	Tube.NephQTL2	0.999988	ENSG00000213071	LPAL2
3562	6_160174632_161174632	All_African_meta-analysis	Minor_Salivary_Gland	0.999988	ENSG00000112110	MRPL18	mitochondrial ribosomal protein L18
3564	6_160174632_161174632	All_African_meta-analysis	Esophagus_Muscularis	0.999988	ENSG00000112110	MRPL18	mitochondrial ribosomal protein L18
3560	6_160174632_161174632	All_African_meta-analysis	Ovary	0.999988	ENSG00000146477	SLC22A3	solute carrier family 22 member 3
3459	6_160174632_161174632	All_African_meta-analysis	Thyroid	0.999988	ENSG00000146457	WTAP	WT1 associated protein
3459	6_160174632_161174632	All_African_meta-analysis	Testis	0.999988	ENSG00000146457	WTAP	WT1 associated protein
3564	6_160174632_161174632	All_African_meta-analysis	Testis	0.999988	ENSG00000112110	MRPL18	mitochondrial ribosomal protein L18
3564	6_160174632_161174632	All_African_meta-analysis	Testis	0.999988	ENSG00000146477	SLC22A3	solute carrier family 22 member 3
3564	6_160174632_161174632	All_African_meta-analysis	Adipose_Visceral_Omentum	0.999988	ENSG00000146477	SLC22A3	solute carrier family 22 member 3
3026	6_160174632_161174632	All_African_meta-analysis	Cells_Cultured_fibroblasts	0.999988	ENSG00000237927
3564	6_160174632_161174632	All_African_meta-analysis	Adrenal_Gland	0.999988	ENSG00000112110	MRPL18	mitochondrial ribosomal protein L18
3564	6_160174632_161174632	All_African_meta-analysis	Muscle_Skeletal	0.999988	ENSG00000175003	SLC22A1	solute carrier family 22 member 1
3564	6_160174632_161174632	All_African_meta-analysis	Thyroid	0.999988	ENSG00000175003	SLC22A1	solute carrier family 22 member 1
3564	6_160174632_161174632	All_African_meta-analysis	Muscle_Skeletal	0.999988	ENSG00000213073	CHP1P2
3564	6_160174632_161174632	All_African_meta-analysis	Adipose_Subcutaneous	0.999988	ENSG00000175003	SLC22A1	solute carrier family 22 member 1
3564	6_160174632_161174632	All_African_meta-analysis	Artery_Tibial	0.999988	ENSG00000112110	MRPL18	mitochondrial ribosomal protein L18
3564	6_160174632_161174632	All_African_meta-analysis	Brain_Cortex	0.999988	ENSG00000146477	SLC22A3	solute carrier family 22 member 3
3564	6_160174632_161174632	All_African_meta-analysis	Heart_Atrial_Appendage	0.999988	ENSG00000112110	MRPL18	mitochondrial ribosomal protein L18
3026	6_160174632_161174632	All_African_meta-analysis	Adipose_Subcutaneous	0.999988	ENSG00000237927
3564	6_160174632_161174632	All_African_meta-analysis	Lung	0.999988	ENSG00000175003	SLC22A1	solute carrier family 22 member 1
3564	6_160174632_161174632	All_African_meta-analysis	Heart_Left_Ventricle	0.999988	ENSG00000112110	MRPL18	mitochondrial ribosomal protein L18
3564	6_160174632_161174632	All_African_meta-analysis	Lung	0.999988	ENSG00000112110	MRPL18	mitochondrial ribosomal protein L18
3564	6_160174632_161174632	All_African_meta-analysis	Nerve_Tibial	0.999988	ENSG00000146477	SLC22A3	solute carrier family 22 member 3
3459	6_160174632_161174632	All_African_meta-analysis	Artery_Tibial	0.999988	ENSG00000146457	WTAP	WT1 associated protein
3564	6_160174632_161174632	All_African_meta-analysis	Esophagus_Mucosa	0.999988	ENSG00000146477	SLC22A3	solute carrier family 22 member 3
3459	6_160174632_161174632	All_African_meta-analysis	Adipose_Subcutaneous	0.999988	ENSG00000146457	WTAP	WT1 associated protein
3564	6_160174632_161174632	All_African_meta-analysis	Artery_Tibial	0.999988	ENSG00000146477	SLC22A3	solute carrier family 22 member 3
3538	6_160174632_161174632	All_African_meta-analysis	Brain_Substantia_nigra	0.999988	ENSG00000146453	PNLDC1	PARN like ribonuclease domain containing exonuclease 1
3564	6_160174632_161174632	All_African_meta-analysis	Adipose_Subcutaneous	0.999988	ENSG00000112110	MRPL18	mitochondrial ribosomal protein L18
3541	6_160174632_161174632	All_African_meta-analysis	Brain_Amygdala	0.999988	ENSG00000146453	PNLDC1	PARN like ribonuclease domain containing exonuclease 1
3564	6_160174632_161174632	All_African_meta-analysis	Artery_Aorta	0.999988	ENSG00000146453	PNLDC1	PARN like ribonuclease domain containing exonuclease 1
3564	6_160174632_161174632	All_African_meta-analysis	Brain_Nucleus_accumbens_basal_ganglia	0.999988	ENSG00000146453	PNLDC1	PARN like ribonuclease domain containing exonuclease 1
3564	6_160174632_161174632	All_African_meta-analysis	Cells_Cultured_fibroblasts	0.999988	ENSG00000146453	PNLDC1	PARN like ribonuclease domain containing exonuclease 1
3556	6_160174632_161174632	All_African_meta-analysis	Pituitary	0.999988	ENSG00000146453	PNLDC1	PARN like ribonuclease domain containing exonuclease 1
3564	6_160174632_161174632	All_African_meta-analysis	Lung	0.999988	ENSG00000146453	PNLDC1	PARN like ribonuclease domain containing exonuclease 1
3564	6_160174632_161174632	All_African_meta-analysis	Adipose_Subcutaneous	0.999988	ENSG00000146453	PNLDC1	PARN like ribonuclease domain containing exonuclease 1
3564	6_160174632_161174632	All_African_meta-analysis	Thyroid	0.999988	ENSG00000146453	PNLDC1	PARN like ribonuclease domain containing exonuclease 1
3564	6_160174632_161174632	All_African_meta-analysis	Breast_Mammary_Tissue	0.999988	ENSG00000146453	PNLDC1	PARN like ribonuclease domain containing exonuclease 1
3564	6_160174632_161174632	All_African_meta-analysis	Adipose_Visceral_Omentum	0.999988	ENSG00000146453	PNLDC1	PARN like ribonuclease domain containing exonuclease 1
3564	6_160174632_161174632	All_African_meta-analysis	Heart_Atrial_Appendage	0.999988	ENSG00000146453	PNLDC1	PARN like ribonuclease domain containing exonuclease 1
3564	6_160174632_161174632	All_African_meta-analysis	Skin_Sun_Exposed_Lower_leg	0.999988	ENSG00000146453	PNLDC1	PARN like ribonuclease domain containing exonuclease 1
3564	6_160174632_161174632	All_African_meta-analysis	Skin_Not_Sun_Exposed_Suprapubic	0.999988	ENSG00000146453	PNLDC1	PARN like ribonuclease domain containing exonuclease 1
3564	6_160174632_161174632	All_African_meta-analysis	Nerve_Tibial	0.999988	ENSG00000146453	PNLDC1	PARN like ribonuclease domain containing exonuclease 1
3564	6_160174632_161174632	All_African_meta-analysis	Muscle_Skeletal	0.999988	ENSG00000146453	PNLDC1	PARN like ribonuclease domain containing exonuclease 1
3562	6_160174632_161174632	All_African_meta-analysis	Brain_Caudate_basal_ganglia	0.999988	ENSG00000146453	PNLDC1	PARN like ribonuclease domain containing exonuclease 1
3564	6_160174632_161174632	All_African_meta-analysis	Esophagus_Muscularis	0.999988	ENSG00000146453	PNLDC1	PARN like ribonuclease domain containing exonuclease 1
3564	6_160174632_161174632	All_African_meta-analysis	Adrenal_Gland	0.999988	ENSG00000146453	PNLDC1	PARN like ribonuclease domain containing exonuclease 1
3564	6_160174632_161174632	All_African_meta-analysis	Esophagus_Mucosa	0.999988	ENSG00000146453	PNLDC1	PARN like ribonuclease domain containing exonuclease 1
3562	6_160174632_161174632	All_African_meta-analysis	Brain_Hippocampus	0.999988	ENSG00000146453	PNLDC1	PARN like ribonuclease domain containing exonuclease 1
3564	6_160174632_161174632	All_African_meta-analysis	Skin_Not_Sun_Exposed_Suprapubic	0.999988	ENSG00000112110	MRPL18	mitochondrial ribosomal protein L18
4479	6_160174632_161174632	All_African_meta-analysis	Glom.NephQTL2	0.999988	ENSG00000112110	MRPL18	mitochondrial ribosomal protein L18
3564	6_160174632_161174632	All_African_meta-analysis	Adipose_Subcutaneous	0.999988	ENSG00000146477	SLC22A3	solute carrier family 22 member 3
3564	6_160174632_161174632	All_African_meta-analysis	Artery_Aorta	0.999988	ENSG00000112110	MRPL18	mitochondrial ribosomal protein L18
3564	6_160174632_161174632	All_African_meta-analysis	Esophagus_Gastroesophageal_Junction	0.999988	ENSG00000146453	PNLDC1	PARN like ribonuclease domain containing exonuclease 1
3026	6_160174632_161174632	All_African_meta-analysis	Adipose_Visceral_Omentum	0.999988	ENSG00000237927
3564	6_160174632_161174632	All_African_meta-analysis	Breast_Mammary_Tissue	0.999988	ENSG00000112110	MRPL18	mitochondrial ribosomal protein L18
4353	6_160174632_161174632	All_African_meta-analysis	Tube.NephQTL2	0.999988	ENSG00000230234
3564	6_160174632_161174632	All_African_meta-analysis	Colon_Sigmoid	0.999988	ENSG00000112110	MRPL18	mitochondrial ribosomal protein L18
2584	15_75713980_76713980	All_African_meta-analysis	Artery_Tibial	0.999988	ENSG00000140374	ETFA	electron transfer flavoprotein subunit alpha
3564	6_160174632_161174632	All_African_meta-analysis	Adipose_Visceral_Omentum	0.999988	ENSG00000112110	MRPL18	mitochondrial ribosomal protein L18
3564	6_160174632_161174632	All_African_meta-analysis	Muscle_Skeletal	0.999988	ENSG00000112110	MRPL18	mitochondrial ribosomal protein L18
3564	6_160174632_161174632	All_African_meta-analysis	Nerve_Tibial	0.999988	ENSG00000112110	MRPL18	mitochondrial ribosomal protein L18
3564	6_160174632_161174632	All_African_meta-analysis	Thyroid	0.999988	ENSG00000112110	MRPL18	mitochondrial ribosomal protein L18
3564	6_160174632_161174632	All_African_meta-analysis	Pancreas	0.999988	ENSG00000112110	MRPL18	mitochondrial ribosomal protein L18
3564	6_160174632_161174632	All_African_meta-analysis	Whole_Blood	0.999988	ENSG00000112110	MRPL18	mitochondrial ribosomal protein L18
3560	6_160174632_161174632	All_African_meta-analysis	Ovary	0.999988	ENSG00000112110	MRPL18	mitochondrial ribosomal protein L18
3512	6_160174632_161174632	All_African_meta-analysis	Brain_Spinal_cord_cervical_c-1	0.999988	ENSG00000146453	PNLDC1	PARN like ribonuclease domain containing exonuclease 1
3564	6_160174632_161174632	All_African_meta-analysis	Esophagus_Mucosa	0.999988	ENSG00000198670	LPA	lipoprotein(a)
3564	6_160174632_161174632	All_African_meta-analysis	Cells_Cultured_fibroblasts	0.999988	ENSG00000120437	ACAT2	acetyl-CoA acetyltransferase 2
2912	17_37234482_38234482	All_African_meta-analysis	Cells_Cultured_fibroblasts	0.999988	ENSG00000265799
3563	6_160174632_161174632	All_African_meta-analysis	Liver	0.999988	ENSG00000146477	SLC22A3	solute carrier family 22 member 3
3026	6_160174632_161174632	All_African_meta-analysis	Lung	0.999988	ENSG00000237927
3564	6_160174632_161174632	All_African_meta-analysis	Esophagus_Muscularis	0.999988	ENSG00000197081	IGF2R	insulin like growth factor 2 receptor
3564	6_160174632_161174632	All_African_meta-analysis	Adipose_Visceral_Omentum	0.999987	ENSG00000175003	SLC22A1	solute carrier family 22 member 1
3564	6_160174632_161174632	All_African_meta-analysis	Nerve_Tibial	0.999987	ENSG00000197081	IGF2R	insulin like growth factor 2 receptor
3564	6_160174632_161174632	All_African_meta-analysis	Heart_Left_Ventricle	0.999987	ENSG00000146453	PNLDC1	PARN like ribonuclease domain containing exonuclease 1
3242	15_44721609_45721609	All_African_meta-analysis	Cells_Cultured_fibroblasts	0.999985	ENSG00000140263	SORD	sorbitol dehydrogenase
3558	6_160174632_161174632	All_African_meta-analysis	Brain_Hypothalamus	0.999985	ENSG00000146453	PNLDC1	PARN like ribonuclease domain containing exonuclease 1
3542	6_160174632_161174632	All_African_meta-analysis	Brain_Anterior_cingulate_cortex_BA24	0.999985	ENSG00000146453	PNLDC1	PARN like ribonuclease domain containing exonuclease 1
2584	15_75713980_76713980	All_African_meta-analysis	Spleen	0.999984	ENSG00000169371	SNUPN	snurportin 1
3459	6_160174632_161174632	All_African_meta-analysis	Esophagus_Mucosa	0.999984	ENSG00000146457	WTAP	WT1 associated protein
3242	15_44721609_45721609	All_African_meta-analysis	Esophagus_Gastroesophageal_Junction	0.999984	ENSG00000259433
2385	15_75713980_76713980	All_African_meta-analysis	Artery_Aorta	0.999984	ENSG00000140365	COMMD4	COMM domain containing 4
3564	6_160174632_161174632	All_African_meta-analysis	Testis	0.999984	ENSG00000146453	PNLDC1	PARN like ribonuclease domain containing exonuclease 1
3242	15_44721609_45721609	All_African_meta-analysis	Skin_Not_Sun_Exposed_Suprapubic	0.999982	ENSG00000171763	AFG2B	AFG2 AAA ATPase homolog B
1475	15_75713980_76713980	All_African_meta-analysis	Artery_Coronary	0.999982	ENSG00000140386	SCAPER	S-phase cyclin A associated protein in the ER
2584	15_75713980_76713980	All_African_meta-analysis	Artery_Tibial	0.999982	ENSG00000169410	PTPN9	protein tyrosine phosphatase non-receptor type 9
2861	17_37234482_38234482	All_African_meta-analysis	Artery_Tibial	0.999981	ENSG00000263818	RDM1P5
3564	6_160174632_161174632	All_African_meta-analysis	Colon_Sigmoid	0.999981	ENSG00000146453	PNLDC1	PARN like ribonuclease domain containing exonuclease 1
3459	6_160174632_161174632	All_African_meta-analysis	Nerve_Tibial	0.999981	ENSG00000146457	WTAP	WT1 associated protein
3382	15_45639843_46639843	All_African_meta-analysis	Skin_Not_Sun_Exposed_Suprapubic	0.99998	ENSG00000171763	AFG2B	AFG2 AAA ATPase homolog B
3564	6_160174632_161174632	All_African_meta-analysis	Colon_Transverse	0.999979	ENSG00000146477	SLC22A3	solute carrier family 22 member 3
2385	15_75713980_76713980	All_African_meta-analysis	Esophagus_Muscularis	0.999978	ENSG00000140365	COMMD4	COMM domain containing 4
2584	15_75713980_76713980	All_African_meta-analysis	Spleen	0.999977	ENSG00000159556	ISL2	ISL LIM homeobox 2
3141	15_45639843_46639843	All_African_meta-analysis	Spleen	0.999977	ENSG00000259520	SLC28A2-AS1
3562	6_160174632_161174632	All_African_meta-analysis	Brain_Putamen_basal_ganglia	0.999976	ENSG00000146453	PNLDC1	PARN like ribonuclease domain containing exonuclease 1
2731	15_45639843_46639843	All_African_meta-analysis	Esophagus_Muscularis	0.999976	ENSG00000259539
2583	15_75713980_76713980	All_African_meta-analysis	Stomach	0.999976	ENSG00000169371	SNUPN	snurportin 1
3459	6_160174632_161174632	All_African_meta-analysis	Esophagus_Muscularis	0.999976	ENSG00000146457	WTAP	WT1 associated protein
2912	17_37234482_38234482	All_African_meta-analysis	Breast_Mammary_Tissue	0.999974	ENSG00000161395	PGAP3	post-GPI attachment to proteins phospholipase 3
3564	6_160174632_161174632	All_African_meta-analysis	Brain_Cortex	0.999974	ENSG00000112110	MRPL18	mitochondrial ribosomal protein L18
3330	15_45639843_46639843	All_African_meta-analysis	Esophagus_Gastroesophageal_Junction	0.999973	ENSG00000259433
3382	15_45639843_46639843	All_African_meta-analysis	Lung	0.999973	ENSG00000259354	SLC30A4-AS1
1472	15_75713980_76713980	All_African_meta-analysis	Vagina	0.999973	ENSG00000140386	SCAPER	S-phase cyclin A associated protein in the ER
3562	6_160174632_161174632	All_African_meta-analysis	Brain_Caudate_basal_ganglia	0.999972	ENSG00000146477	SLC22A3	solute carrier family 22 member 3
2385	15_75713980_76713980	All_African_meta-analysis	Nerve_Tibial	0.999971	ENSG00000140365	COMMD4	COMM domain containing 4
3564	6_160174632_161174632	All_African_meta-analysis	Cells_Cultured_fibroblasts	0.999969	ENSG00000213071	LPAL2
2584	15_75713980_76713980	All_African_meta-analysis	Thyroid	0.999968	ENSG00000196274
2912	17_37234482_38234482	All_African_meta-analysis	Breast_Mammary_Tissue	0.999967	ENSG00000264968
2912	17_37234482_38234482	All_African_meta-analysis	Adipose_Subcutaneous	0.999966	ENSG00000172057	ORMDL3	ORMDL sphingolipid biosynthesis regulator 3
2912	17_37234482_38234482	All_African_meta-analysis	Skin_Sun_Exposed_Lower_leg	0.999965	ENSG00000141736	ERBB2	erb-b2 receptor tyrosine kinase 2
3556	6_160174632_161174632	All_African_meta-analysis	Pituitary	0.999964	ENSG00000146477	SLC22A3	solute carrier family 22 member 3
2582	15_75713980_76713980	All_African_meta-analysis	Brain_Cortex	0.999963	ENSG00000169371	SNUPN	snurportin 1
2910	17_37234482_38234482	All_African_meta-analysis	Brain_Cortex	0.999963	ENSG00000008838	MED24	mediator complex subunit 24
3562	6_160174632_161174632	All_African_meta-analysis	Brain_Putamen_basal_ganglia	0.999962	ENSG00000146477	SLC22A3	solute carrier family 22 member 3
2912	17_37234482_38234482	All_African_meta-analysis	Lung	0.999962	ENSG00000141744	PNMT	phenylethanolamine N-methyltransferase
3026	6_160174632_161174632	All_African_meta-analysis	Artery_Aorta	0.99996	ENSG00000237927
3026	6_160174632_161174632	All_African_meta-analysis	Breast_Mammary_Tissue	0.999958	ENSG00000237927
3242	15_44721609_45721609	All_African_meta-analysis	Testis	0.999954	ENSG00000140263	SORD	sorbitol dehydrogenase
2720	17_37234482_38234482	All_African_meta-analysis	Nerve_Tibial	0.999951	ENSG00000188895	MSL1	MSL complex subunit 1
2584	15_75713980_76713980	All_African_meta-analysis	Esophagus_Mucosa	0.999949	ENSG00000169752	NRG4	neuregulin 4
3242	15_44721609_45721609	All_African_meta-analysis	Colon_Transverse	0.999948	ENSG00000259539
2912	17_37234482_38234482	All_African_meta-analysis	Skin_Sun_Exposed_Lower_leg	0.999947	ENSG00000073605	GSDMB	gasdermin B
3564	6_160174632_161174632	All_African_meta-analysis	Spleen	0.999946	ENSG00000146453	PNLDC1	PARN like ribonuclease domain containing exonuclease 1
3382	15_45639843_46639843	All_African_meta-analysis	Testis	0.999944	ENSG00000166920	C15orf48	chromosome 15 open reading frame 48
2584	15_75713980_76713980	All_African_meta-analysis	Cells_Cultured_fibroblasts	0.999941	ENSG00000140374	ETFA	electron transfer flavoprotein subunit alpha
2584	15_75713980_76713980	All_African_meta-analysis	Artery_Aorta	0.99994	ENSG00000169371	SNUPN	snurportin 1
2904	17_37234482_38234482	All_African_meta-analysis	Small_Intestine_Terminal_Ileum	0.99994	ENSG00000172057	ORMDL3	ORMDL sphingolipid biosynthesis regulator 3
2912	17_37234482_38234482	All_African_meta-analysis	Prostate	0.99994	ENSG00000161395	PGAP3	post-GPI attachment to proteins phospholipase 3
2912	17_37234482_38234482	All_African_meta-analysis	Esophagus_Muscularis	0.999937	ENSG00000172057	ORMDL3	ORMDL sphingolipid biosynthesis regulator 3
2731	15_45639843_46639843	All_African_meta-analysis	Artery_Aorta	0.999937	ENSG00000259539
3053	15_45639843_46639843	All_African_meta-analysis	Cells_EBV-transformed_lymphocytes	0.999937	ENSG00000137860	SLC28A2	solute carrier family 28 member 2
3380	15_45639843_46639843	All_African_meta-analysis	Liver	0.999934	ENSG00000273972
3564	6_160174632_161174632	All_African_meta-analysis	Adipose_Visceral_Omentum	0.99993	ENSG00000120437	ACAT2	acetyl-CoA acetyltransferase 2
3564	6_160174632_161174632	All_African_meta-analysis	Artery_Tibial	0.999928	ENSG00000120437	ACAT2	acetyl-CoA acetyltransferase 2
3382	15_45639843_46639843	All_African_meta-analysis	Colon_Sigmoid	0.999923	ENSG00000259200		uncharacterized LOC105370802
3053	15_45639843_46639843	All_African_meta-analysis	Uterus	0.999919	ENSG00000137860	SLC28A2	solute carrier family 28 member 2
3562	6_160174632_161174632	All_African_meta-analysis	Brain_Frontal_Cortex_BA9	0.999916	ENSG00000146477	SLC22A3	solute carrier family 22 member 3
3241	15_44721609_45721609	All_African_meta-analysis	Small_Intestine_Terminal_Ileum	0.999916	ENSG00000171763	AFG2B	AFG2 AAA ATPase homolog B
3241	15_44721609_45721609	All_African_meta-analysis	Artery_Coronary	0.999914	ENSG00000259539
2461	15_75713980_76713980	All_African_meta-analysis	Brain_Cerebellum	0.999912	ENSG00000260274
3681	21_44912872_45912872	All_African_meta-analysis	TGP_Cell_lines	0.999912	ENSG00000241945.8	PWP2	PWP2 small subunit processome component
3681	21_44912872_45912872	All_African_meta-analysis	TGP_Cell_lines	0.999911	ENSG00000160221.18	GATD3	glutamine amidotransferase class 1 domain containing 3
4414	21_44912872_45912872	All_African_meta-analysis	Tube.NephQTL2	0.999911	ENSG00000142182	DNMT3L	DNA methyltransferase 3 like
4414	21_44912872_45912872	All_African_meta-analysis	Tube.NephQTL2	0.999911	ENSG00000232010	DNMT3L-AS1	DNMT3L antisense RNA 1
4516	21_44912872_45912872	All_African_meta-analysis	Glom.NephQTL2	0.999911	ENSG00000160226	CFAP410	cilia and flagella associated protein 410
4414	21_44912872_45912872	All_African_meta-analysis	Tube.NephQTL2	0.999911	ENSG00000160226	CFAP410	cilia and flagella associated protein 410
3681	21_44912872_45912872	All_African_meta-analysis	TGP_Cell_lines	0.999911	ENSG00000160226.16	CFAP410	cilia and flagella associated protein 410
3681	21_44912872_45912872	All_African_meta-analysis	TGP_Cell_lines	0.999911	ENSG00000160207.9	HSF2BP	heat shock transcription factor 2 binding protein
4414	21_44912872_45912872	All_African_meta-analysis	Tube.NephQTL2	0.999911	ENSG00000160213	CSTB	cystatin B
4516	21_44912872_45912872	All_African_meta-analysis	Glom.NephQTL2	0.999911	ENSG00000160213	CSTB	cystatin B
4414	21_44912872_45912872	All_African_meta-analysis	Tube.NephQTL2	0.999911	ENSG00000141959	PFKL	phosphofructokinase, liver type
4516	21_44912872_45912872	All_African_meta-analysis	Glom.NephQTL2	0.999911	ENSG00000277117		ICOS ligand
4516	21_44912872_45912872	All_African_meta-analysis	Glom.NephQTL2	0.99991	ENSG00000160223	ICOSLG	inducible T cell costimulator ligand
4516	21_44912872_45912872	All_African_meta-analysis	Glom.NephQTL2	0.99991	ENSG00000160223	ICOSLG	ICOS ligand
4414	21_44912872_45912872	All_African_meta-analysis	Tube.NephQTL2	0.99991	ENSG00000160223	ICOSLG	inducible T cell costimulator ligand
4414	21_44912872_45912872	All_African_meta-analysis	Tube.NephQTL2	0.99991	ENSG00000160223	ICOSLG	ICOS ligand
4414	21_44912872_45912872	All_African_meta-analysis	Tube.NephQTL2	0.99991	ENSG00000277117		ICOS ligand
3681	21_44912872_45912872	All_African_meta-analysis	TGP_Cell_lines	0.99991	ENSG00000184441.4
3681	21_44912872_45912872	All_African_meta-analysis	TGP_Cell_lines	0.99991	ENSG00000160213.9	CSTB	cystatin B
3564	6_160174632_161174632	All_African_meta-analysis	Brain_Cortex	0.999909	ENSG00000146453	PNLDC1	PARN like ribonuclease domain containing exonuclease 1
2578	15_75713980_76713980	All_African_meta-analysis	Brain_Anterior_cingulate_cortex_BA24	0.999908	ENSG00000169371	SNUPN	snurportin 1
3681	21_44912872_45912872	All_African_meta-analysis	TGP_Cell_lines	0.999907	ENSG00000160214.13	RRP1	ribosomal RNA processing 1
2731	15_45639843_46639843	All_African_meta-analysis	Nerve_Tibial	0.999906	ENSG00000259539
3371	15_45639843_46639843	All_African_meta-analysis	Small_Intestine_Terminal_Ileum	0.999903	ENSG00000171763	AFG2B	AFG2 AAA ATPase homolog B
2912	17_37234482_38234482	All_African_meta-analysis	Muscle_Skeletal	0.999903	ENSG00000108306	FBXL20	F-box and leucine rich repeat protein 20
2912	17_37234482_38234482	All_African_meta-analysis	Heart_Atrial_Appendage	0.999902	ENSG00000264968
3026	6_160174632_161174632	All_African_meta-analysis	Esophagus_Mucosa	0.999901	ENSG00000237927
3318	15_45639843_46639843	All_African_meta-analysis	Brain_Substantia_nigra	0.999896	ENSG00000259433
3238	15_44721609_45721609	All_African_meta-analysis	Brain_Frontal_Cortex_BA9	0.999895	ENSG00000138606	SHF	Src homology 2 domain containing F
2457	11_64644075_65644075	All_African_meta-analysis	Whole_Blood	0.99989	ENSG00000014138	POLA2	DNA polymerase alpha 2, accessory subunit
2457	11_64644075_65644075	All_African_meta-analysis	Skin_Sun_Exposed_Lower_leg	0.99989	ENSG00000110025	SNX15	sorting nexin 15
2457	11_64644075_65644075	All_African_meta-analysis	Muscle_Skeletal	0.99989	ENSG00000110025	SNX15	sorting nexin 15
2457	11_64644075_65644075	All_African_meta-analysis	Nerve_Tibial	0.99989	ENSG00000133884	DPF2	double PHD fingers 2
2457	11_64644075_65644075	All_African_meta-analysis	Testis	0.99989	ENSG00000133884	DPF2	double PHD fingers 2
2457	11_64644075_65644075	All_African_meta-analysis	Cells_Cultured_fibroblasts	0.99989	ENSG00000133884	DPF2	double PHD fingers 2
2457	11_64644075_65644075	All_African_meta-analysis	Whole_Blood	0.99989	ENSG00000110025	SNX15	sorting nexin 15
3349	11_64644075_65644075	All_African_meta-analysis	TGP_Cell_lines	0.99989	ENSG00000175602.4	CCDC85B	coiled-coil domain containing 85B
2457	11_64644075_65644075	All_African_meta-analysis	Skin_Not_Sun_Exposed_Suprapubic	0.99989	ENSG00000110025	SNX15	sorting nexin 15
2457	11_64644075_65644075	All_African_meta-analysis	Cells_Cultured_fibroblasts	0.99989	ENSG00000110025	SNX15	sorting nexin 15
2457	11_64644075_65644075	All_African_meta-analysis	Esophagus_Muscularis	0.99989	ENSG00000110025	SNX15	sorting nexin 15
2735	11_64644075_65644075	All_African_meta-analysis	Tube.NephQTL2	0.99989	ENSG00000255120	OVOL1-AS1	OVOL1 antisense RNA 1
3016	11_64644075_65644075	All_African_meta-analysis	Glom.NephQTL2	0.99989	ENSG00000172757	CFL1	cofilin 1
2457	11_64644075_65644075	All_African_meta-analysis	Thyroid	0.99989	ENSG00000197847	SLC22A20P
2457	11_64644075_65644075	All_African_meta-analysis	Skin_Sun_Exposed_Lower_leg	0.99989	ENSG00000133884	DPF2	double PHD fingers 2
2457	11_64644075_65644075	All_African_meta-analysis	Skin_Not_Sun_Exposed_Suprapubic	0.99989	ENSG00000197847	SLC22A20P
2457	11_64644075_65644075	All_African_meta-analysis	Testis	0.99989	ENSG00000172757	CFL1	cofilin 1
2457	11_64644075_65644075	All_African_meta-analysis	Brain_Cerebellum	0.99989	ENSG00000197847	SLC22A20P
2457	11_64644075_65644075	All_African_meta-analysis	Colon_Transverse	0.99989	ENSG00000197847	SLC22A20P
2457	11_64644075_65644075	All_African_meta-analysis	Lung	0.99989	ENSG00000197847	SLC22A20P
2457	11_64644075_65644075	All_African_meta-analysis	Nerve_Tibial	0.99989	ENSG00000245532	NEAT1	nuclear paraspeckle assembly transcript 1
2457	11_64644075_65644075	All_African_meta-analysis	Muscle_Skeletal	0.99989	ENSG00000245532	NEAT1	nuclear paraspeckle assembly transcript 1
2457	11_64644075_65644075	All_African_meta-analysis	Cells_Cultured_fibroblasts	0.99989	ENSG00000245532	NEAT1	nuclear paraspeckle assembly transcript 1
2457	11_64644075_65644075	All_African_meta-analysis	Thyroid	0.99989	ENSG00000245532	NEAT1	nuclear paraspeckle assembly transcript 1
2457	11_64644075_65644075	All_African_meta-analysis	Adipose_Subcutaneous	0.99989	ENSG00000245532	NEAT1	nuclear paraspeckle assembly transcript 1
2457	11_64644075_65644075	All_African_meta-analysis	Colon_Transverse	0.99989	ENSG00000245532	NEAT1	nuclear paraspeckle assembly transcript 1
2454	11_64644075_65644075	All_African_meta-analysis	Spleen	0.99989	ENSG00000245532	NEAT1	nuclear paraspeckle assembly transcript 1
2457	11_64644075_65644075	All_African_meta-analysis	Esophagus_Mucosa	0.99989	ENSG00000245532	NEAT1	nuclear paraspeckle assembly transcript 1
2457	11_64644075_65644075	All_African_meta-analysis	Esophagus_Mucosa	0.99989	ENSG00000197847	SLC22A20P
2457	11_64644075_65644075	All_African_meta-analysis	Heart_Atrial_Appendage	0.99989	ENSG00000245532	NEAT1	nuclear paraspeckle assembly transcript 1
2457	11_64644075_65644075	All_African_meta-analysis	Skin_Sun_Exposed_Lower_leg	0.99989	ENSG00000197847	SLC22A20P
2457	11_64644075_65644075	All_African_meta-analysis	Esophagus_Muscularis	0.99989	ENSG00000245532	NEAT1	nuclear paraspeckle assembly transcript 1
2457	11_64644075_65644075	All_African_meta-analysis	Adipose_Subcutaneous	0.99989	ENSG00000197847	SLC22A20P
2457	11_64644075_65644075	All_African_meta-analysis	Muscle_Skeletal	0.99989	ENSG00000014138	POLA2	DNA polymerase alpha 2, accessory subunit
2457	11_64644075_65644075	All_African_meta-analysis	Brain_Cerebellum	0.99989	ENSG00000245532	NEAT1	nuclear paraspeckle assembly transcript 1
2457	11_64644075_65644075	All_African_meta-analysis	Artery_Tibial	0.99989	ENSG00000260233	ZNRD2-DT
2457	11_64644075_65644075	All_African_meta-analysis	Muscle_Skeletal	0.99989	ENSG00000260233	ZNRD2-DT
2457	11_64644075_65644075	All_African_meta-analysis	Thyroid	0.99989	ENSG00000260233	ZNRD2-DT
2457	11_64644075_65644075	All_African_meta-analysis	Nerve_Tibial	0.99989	ENSG00000260233	ZNRD2-DT
2457	11_64644075_65644075	All_African_meta-analysis	Skin_Not_Sun_Exposed_Suprapubic	0.99989	ENSG00000168061	SAC3D1	SAC3 domain containing 1
2457	11_64644075_65644075	All_African_meta-analysis	Pancreas	0.99989	ENSG00000245532	NEAT1	nuclear paraspeckle assembly transcript 1
2457	11_64644075_65644075	All_African_meta-analysis	Adipose_Visceral_Omentum	0.99989	ENSG00000245532	NEAT1	nuclear paraspeckle assembly transcript 1
2457	11_64644075_65644075	All_African_meta-analysis	Muscle_Skeletal	0.99989	ENSG00000213465	ARL2	ADP ribosylation factor like GTPase 2
2457	11_64644075_65644075	All_African_meta-analysis	Esophagus_Mucosa	0.99989	ENSG00000110025	SNX15	sorting nexin 15
2454	11_64644075_65644075	All_African_meta-analysis	Spleen	0.99989	ENSG00000173727	FAUP4
2457	11_64644075_65644075	All_African_meta-analysis	Esophagus_Gastroesophageal_Junction	0.99989	ENSG00000245532	NEAT1	nuclear paraspeckle assembly transcript 1
2455	11_64644075_65644075	All_African_meta-analysis	Brain_Cerebellar_Hemisphere	0.99989	ENSG00000172638	EFEMP2	EGF containing fibulin extracellular matrix protein 2
2446	11_64644075_65644075	All_African_meta-analysis	Vagina	0.99989	ENSG00000172803	SNX32	sorting nexin 32
2457	11_64644075_65644075	All_African_meta-analysis	Testis	0.99989	ENSG00000168061	SAC3D1	SAC3 domain containing 1
2457	11_64644075_65644075	All_African_meta-analysis	Pancreas	0.99989	ENSG00000014138	POLA2	DNA polymerase alpha 2, accessory subunit
2457	11_64644075_65644075	All_African_meta-analysis	Nerve_Tibial	0.99989	ENSG00000110025	SNX15	sorting nexin 15
2457	11_64644075_65644075	All_African_meta-analysis	Skin_Sun_Exposed_Lower_leg	0.99989	ENSG00000245532	NEAT1	nuclear paraspeckle assembly transcript 1
2457	11_64644075_65644075	All_African_meta-analysis	Esophagus_Gastroesophageal_Junction	0.99989	ENSG00000110025	SNX15	sorting nexin 15
2457	11_64644075_65644075	All_African_meta-analysis	Adipose_Subcutaneous	0.99989	ENSG00000255200	PGAM1P8
2457	11_64644075_65644075	All_African_meta-analysis	Breast_Mammary_Tissue	0.99989	ENSG00000254614	CAPN1-AS1	CAPN1 antisense RNA 1
2457	11_64644075_65644075	All_African_meta-analysis	Esophagus_Gastroesophageal_Junction	0.99989	ENSG00000255200	PGAM1P8
2457	11_64644075_65644075	All_African_meta-analysis	Heart_Left_Ventricle	0.99989	ENSG00000245532	NEAT1	nuclear paraspeckle assembly transcript 1
2457	11_64644075_65644075	All_African_meta-analysis	Adipose_Visceral_Omentum	0.99989	ENSG00000110025	SNX15	sorting nexin 15
2446	11_64644075_65644075	All_African_meta-analysis	Brain_Hypothalamus	0.99989	ENSG00000172803	SNX32	sorting nexin 32
2457	11_64644075_65644075	All_African_meta-analysis	Adrenal_Gland	0.99989	ENSG00000245532	NEAT1	nuclear paraspeckle assembly transcript 1
2457	11_64644075_65644075	All_African_meta-analysis	Pancreas	0.99989	ENSG00000172803	SNX32	sorting nexin 32
2457	11_64644075_65644075	All_African_meta-analysis	Artery_Coronary	0.99989	ENSG00000172803	SNX32	sorting nexin 32
2457	11_64644075_65644075	All_African_meta-analysis	Artery_Tibial	0.99989	ENSG00000245532	NEAT1	nuclear paraspeckle assembly transcript 1
2457	11_64644075_65644075	All_African_meta-analysis	Testis	0.99989	ENSG00000014138	POLA2	DNA polymerase alpha 2, accessory subunit
2457	11_64644075_65644075	All_African_meta-analysis	Whole_Blood	0.99989	ENSG00000172803	SNX32	sorting nexin 32
2457	11_64644075_65644075	All_African_meta-analysis	Whole_Blood	0.99989	ENSG00000172638	EFEMP2	EGF containing fibulin extracellular matrix protein 2
2446	11_64644075_65644075	All_African_meta-analysis	Brain_Anterior_cingulate_cortex_BA24	0.99989	ENSG00000172803	SNX32	sorting nexin 32
2457	11_64644075_65644075	All_African_meta-analysis	Prostate	0.99989	ENSG00000172803	SNX32	sorting nexin 32
2457	11_64644075_65644075	All_African_meta-analysis	Small_Intestine_Terminal_Ileum	0.99989	ENSG00000172803	SNX32	sorting nexin 32
2454	11_64644075_65644075	All_African_meta-analysis	Spleen	0.99989	ENSG00000172803	SNX32	sorting nexin 32
2457	11_64644075_65644075	All_African_meta-analysis	Artery_Aorta	0.99989	ENSG00000172803	SNX32	sorting nexin 32
2457	11_64644075_65644075	All_African_meta-analysis	Lung	0.99989	ENSG00000204710	SPDYC	speedy/RINGO cell cycle regulator family member C
2457	11_64644075_65644075	All_African_meta-analysis	Heart_Left_Ventricle	0.99989	ENSG00000172803	SNX32	sorting nexin 32
2457	11_64644075_65644075	All_African_meta-analysis	Adipose_Subcutaneous	0.99989	ENSG00000172803	SNX32	sorting nexin 32
2735	11_64644075_65644075	All_African_meta-analysis	Tube.NephQTL2	0.99989	ENSG00000014216	CAPN1	calpain 1
2457	11_64644075_65644075	All_African_meta-analysis	Artery_Tibial	0.99989	ENSG00000172803	SNX32	sorting nexin 32
2457	11_64644075_65644075	All_African_meta-analysis	Thyroid	0.99989	ENSG00000172803	SNX32	sorting nexin 32
2457	11_64644075_65644075	All_African_meta-analysis	Testis	0.99989	ENSG00000172803	SNX32	sorting nexin 32
2457	11_64644075_65644075	All_African_meta-analysis	Esophagus_Gastroesophageal_Junction	0.99989	ENSG00000172803	SNX32	sorting nexin 32
2457	11_64644075_65644075	All_African_meta-analysis	Pituitary	0.99989	ENSG00000172803	SNX32	sorting nexin 32
2457	11_64644075_65644075	All_African_meta-analysis	Stomach	0.99989	ENSG00000172803	SNX32	sorting nexin 32
2457	11_64644075_65644075	All_African_meta-analysis	Brain_Cerebellum	0.99989	ENSG00000172803	SNX32	sorting nexin 32
2457	11_64644075_65644075	All_African_meta-analysis	Breast_Mammary_Tissue	0.99989	ENSG00000172803	SNX32	sorting nexin 32
2457	11_64644075_65644075	All_African_meta-analysis	Lung	0.99989	ENSG00000172803	SNX32	sorting nexin 32
2457	11_64644075_65644075	All_African_meta-analysis	Heart_Atrial_Appendage	0.99989	ENSG00000172803	SNX32	sorting nexin 32
2457	11_64644075_65644075	All_African_meta-analysis	Esophagus_Mucosa	0.99989	ENSG00000172803	SNX32	sorting nexin 32
2457	11_64644075_65644075	All_African_meta-analysis	Skin_Not_Sun_Exposed_Suprapubic	0.99989	ENSG00000172803	SNX32	sorting nexin 32
2455	11_64644075_65644075	All_African_meta-analysis	Brain_Cerebellar_Hemisphere	0.99989	ENSG00000172803	SNX32	sorting nexin 32
2457	11_64644075_65644075	All_African_meta-analysis	Skin_Sun_Exposed_Lower_leg	0.99989	ENSG00000172803	SNX32	sorting nexin 32
2457	11_64644075_65644075	All_African_meta-analysis	Cells_Cultured_fibroblasts	0.99989	ENSG00000172803	SNX32	sorting nexin 32
2457	11_64644075_65644075	All_African_meta-analysis	Nerve_Tibial	0.99989	ENSG00000172803	SNX32	sorting nexin 32
2457	11_64644075_65644075	All_African_meta-analysis	Colon_Transverse	0.99989	ENSG00000172803	SNX32	sorting nexin 32
2457	11_64644075_65644075	All_African_meta-analysis	Esophagus_Muscularis	0.99989	ENSG00000172803	SNX32	sorting nexin 32
2457	11_64644075_65644075	All_African_meta-analysis	Adipose_Visceral_Omentum	0.99989	ENSG00000172803	SNX32	sorting nexin 32
2450	11_64644075_65644075	All_African_meta-analysis	Brain_Cortex	0.99989	ENSG00000172803	SNX32	sorting nexin 32
2457	11_64644075_65644075	All_African_meta-analysis	Adrenal_Gland	0.99989	ENSG00000172803	SNX32	sorting nexin 32
2457	11_64644075_65644075	All_African_meta-analysis	Ovary	0.99989	ENSG00000172803	SNX32	sorting nexin 32
2457	11_64644075_65644075	All_African_meta-analysis	Liver	0.99989	ENSG00000254614	CAPN1-AS1	CAPN1 antisense RNA 1
2457	11_64644075_65644075	All_African_meta-analysis	Pituitary	0.99989	ENSG00000245532	NEAT1	nuclear paraspeckle assembly transcript 1
2453	11_64644075_65644075	All_African_meta-analysis	Brain_Frontal_Cortex_BA9	0.99989	ENSG00000172803	SNX32	sorting nexin 32
2457	11_64644075_65644075	All_African_meta-analysis	Muscle_Skeletal	0.99989	ENSG00000168061	SAC3D1	SAC3 domain containing 1
2457	11_64644075_65644075	All_African_meta-analysis	Skin_Not_Sun_Exposed_Suprapubic	0.99989	ENSG00000254614	CAPN1-AS1	CAPN1 antisense RNA 1
2457	11_64644075_65644075	All_African_meta-analysis	Brain_Cerebellum	0.99989	ENSG00000255200	PGAM1P8
2457	11_64644075_65644075	All_African_meta-analysis	Colon_Sigmoid	0.99989	ENSG00000172803	SNX32	sorting nexin 32
2457	11_64644075_65644075	All_African_meta-analysis	Liver	0.99989	ENSG00000245532	NEAT1	nuclear paraspeckle assembly transcript 1
2456	11_64644075_65644075	All_African_meta-analysis	Brain_Nucleus_accumbens_basal_ganglia	0.99989	ENSG00000245532	NEAT1	nuclear paraspeckle assembly transcript 1
2456	11_64644075_65644075	All_African_meta-analysis	Minor_Salivary_Gland	0.99989	ENSG00000197847	SLC22A20P
2457	11_64644075_65644075	All_African_meta-analysis	Esophagus_Mucosa	0.99989	ENSG00000133884	DPF2	double PHD fingers 2
2457	11_64644075_65644075	All_African_meta-analysis	Artery_Coronary	0.99989	ENSG00000245532	NEAT1	nuclear paraspeckle assembly transcript 1
2457	11_64644075_65644075	All_African_meta-analysis	Lung	0.99989	ENSG00000245532	NEAT1	nuclear paraspeckle assembly transcript 1
2457	11_64644075_65644075	All_African_meta-analysis	Muscle_Skeletal	0.99989	ENSG00000172803	SNX32	sorting nexin 32
2456	11_64644075_65644075	All_African_meta-analysis	Brain_Nucleus_accumbens_basal_ganglia	0.99989	ENSG00000110025	SNX15	sorting nexin 15
2457	11_64644075_65644075	All_African_meta-analysis	Thyroid	0.99989	ENSG00000214659	KRT8P26
2457	11_64644075_65644075	All_African_meta-analysis	Small_Intestine_Terminal_Ileum	0.99989	ENSG00000245532	NEAT1	nuclear paraspeckle assembly transcript 1
2457	11_64644075_65644075	All_African_meta-analysis	Artery_Tibial	0.99989	ENSG00000214659	KRT8P26
2457	11_64644075_65644075	All_African_meta-analysis	Testis	0.99989	ENSG00000245532	NEAT1	nuclear paraspeckle assembly transcript 1
2457	11_64644075_65644075	All_African_meta-analysis	Breast_Mammary_Tissue	0.99989	ENSG00000245532	NEAT1	nuclear paraspeckle assembly transcript 1
2446	11_64644075_65644075	All_African_meta-analysis	Brain_Hypothalamus	0.99989	ENSG00000254614	CAPN1-AS1	CAPN1 antisense RNA 1
2457	11_64644075_65644075	All_African_meta-analysis	Nerve_Tibial	0.99989	ENSG00000270775	EEF1A1P18
2457	11_64644075_65644075	All_African_meta-analysis	Stomach	0.99989	ENSG00000255200	PGAM1P8
2438	11_64644075_65644075	All_African_meta-analysis	Nerve_Tibial	0.99989	ENSG00000172500	FIBP	FGF1 intracellular binding protein
2457	11_64644075_65644075	All_African_meta-analysis	Esophagus_Mucosa	0.99989	ENSG00000254614	CAPN1-AS1	CAPN1 antisense RNA 1
2457	11_64644075_65644075	All_African_meta-analysis	Lung	0.99989	ENSG00000255200	PGAM1P8
3390	11_64644075_65644075	All_African_meta-analysis	TGP_Cell_lines	0.99989	ENSG00000172803.18	SNX32	sorting nexin 32
2457	11_64644075_65644075	All_African_meta-analysis	Esophagus_Mucosa	0.99989	ENSG00000172922	RNASEH2C	ribonuclease H2 subunit C
2457	11_64644075_65644075	All_African_meta-analysis	Nerve_Tibial	0.99989	ENSG00000255200	PGAM1P8
2457	11_64644075_65644075	All_African_meta-analysis	Colon_Sigmoid	0.99989	ENSG00000110025	SNX15	sorting nexin 15
2457	11_64644075_65644075	All_African_meta-analysis	Breast_Mammary_Tissue	0.99989	ENSG00000255200	PGAM1P8
2735	11_64644075_65644075	All_African_meta-analysis	Tube.NephQTL2	0.99989	ENSG00000162298	SYVN1	synoviolin 1
2457	11_64644075_65644075	All_African_meta-analysis	Whole_Blood	0.99989	ENSG00000014216	CAPN1	calpain 1
2457	11_64644075_65644075	All_African_meta-analysis	Thyroid	0.99989	ENSG00000254614	CAPN1-AS1	CAPN1 antisense RNA 1
2457	11_64644075_65644075	All_African_meta-analysis	Stomach	0.99989	ENSG00000172922	RNASEH2C	ribonuclease H2 subunit C
2735	11_64644075_65644075	All_African_meta-analysis	Tube.NephQTL2	0.99989	ENSG00000172922	RNASEH2C	ribonuclease H2 subunit C
2457	11_64644075_65644075	All_African_meta-analysis	Testis	0.99989	ENSG00000254614	CAPN1-AS1	CAPN1 antisense RNA 1
2457	11_64644075_65644075	All_African_meta-analysis	Esophagus_Muscularis	0.99989	ENSG00000172922	RNASEH2C	ribonuclease H2 subunit C
2457	11_64644075_65644075	All_African_meta-analysis	Colon_Transverse	0.99989	ENSG00000270775	EEF1A1P18
2457	11_64644075_65644075	All_African_meta-analysis	Adipose_Subcutaneous	0.99989	ENSG00000172922	RNASEH2C	ribonuclease H2 subunit C
2457	11_64644075_65644075	All_African_meta-analysis	Skin_Not_Sun_Exposed_Suprapubic	0.99989	ENSG00000245532	NEAT1	nuclear paraspeckle assembly transcript 1
2457	11_64644075_65644075	All_African_meta-analysis	Colon_Sigmoid	0.99989	ENSG00000255200	PGAM1P8
2457	11_64644075_65644075	All_African_meta-analysis	Artery_Tibial	0.99989	ENSG00000172922	RNASEH2C	ribonuclease H2 subunit C
2457	11_64644075_65644075	All_African_meta-analysis	Adrenal_Gland	0.99989	ENSG00000172922	RNASEH2C	ribonuclease H2 subunit C
2457	11_64644075_65644075	All_African_meta-analysis	Adipose_Visceral_Omentum	0.99989	ENSG00000255200	PGAM1P8
2457	11_64644075_65644075	All_African_meta-analysis	Artery_Coronary	0.99989	ENSG00000172922	RNASEH2C	ribonuclease H2 subunit C
2457	11_64644075_65644075	All_African_meta-analysis	Colon_Transverse	0.99989	ENSG00000172922	RNASEH2C	ribonuclease H2 subunit C
2450	11_64644075_65644075	All_African_meta-analysis	Brain_Cortex	0.99989	ENSG00000172922	RNASEH2C	ribonuclease H2 subunit C
2457	11_64644075_65644075	All_African_meta-analysis	Nerve_Tibial	0.99989	ENSG00000172922	RNASEH2C	ribonuclease H2 subunit C
2457	11_64644075_65644075	All_African_meta-analysis	Esophagus_Gastroesophageal_Junction	0.99989	ENSG00000172922	RNASEH2C	ribonuclease H2 subunit C
2457	11_64644075_65644075	All_African_meta-analysis	Breast_Mammary_Tissue	0.99989	ENSG00000270775	EEF1A1P18
2457	11_64644075_65644075	All_African_meta-analysis	Esophagus_Muscularis	0.99989	ENSG00000213465	ARL2	ADP ribosylation factor like GTPase 2
2457	11_64644075_65644075	All_African_meta-analysis	Whole_Blood	0.99989	ENSG00000214659	KRT8P26
2457	11_64644075_65644075	All_African_meta-analysis	Lung	0.99989	ENSG00000110025	SNX15	sorting nexin 15
2457	11_64644075_65644075	All_African_meta-analysis	Breast_Mammary_Tissue	0.99989	ENSG00000214659	KRT8P26
2457	11_64644075_65644075	All_African_meta-analysis	Colon_Sigmoid	0.99989	ENSG00000213465	ARL2	ADP ribosylation factor like GTPase 2
2457	11_64644075_65644075	All_African_meta-analysis	Muscle_Skeletal	0.99989	ENSG00000270775	EEF1A1P18
2457	11_64644075_65644075	All_African_meta-analysis	Colon_Sigmoid	0.99989	ENSG00000270775	EEF1A1P18
2457	11_64644075_65644075	All_African_meta-analysis	Esophagus_Muscularis	0.99989	ENSG00000270775	EEF1A1P18
2457	11_64644075_65644075	All_African_meta-analysis	Esophagus_Gastroesophageal_Junction	0.99989	ENSG00000270775	EEF1A1P18
2457	11_64644075_65644075	All_African_meta-analysis	Adipose_Subcutaneous	0.99989	ENSG00000270775	EEF1A1P18
2457	11_64644075_65644075	All_African_meta-analysis	Artery_Tibial	0.99989	ENSG00000270775	EEF1A1P18
2457	11_64644075_65644075	All_African_meta-analysis	Lung	0.99989	ENSG00000172922	RNASEH2C	ribonuclease H2 subunit C
2457	11_64644075_65644075	All_African_meta-analysis	Artery_Aorta	0.99989	ENSG00000270775	EEF1A1P18
2457	11_64644075_65644075	All_African_meta-analysis	Thyroid	0.99989	ENSG00000255200	PGAM1P8
2457	11_64644075_65644075	All_African_meta-analysis	Adipose_Visceral_Omentum	0.99989	ENSG00000172922	RNASEH2C	ribonuclease H2 subunit C
2457	11_64644075_65644075	All_African_meta-analysis	Thyroid	0.99989	ENSG00000172922	RNASEH2C	ribonuclease H2 subunit C
2457	11_64644075_65644075	All_African_meta-analysis	Artery_Aorta	0.99989	ENSG00000172922	RNASEH2C	ribonuclease H2 subunit C
2457	11_64644075_65644075	All_African_meta-analysis	Brain_Caudate_basal_ganglia	0.99989	ENSG00000255200	PGAM1P8
2457	11_64644075_65644075	All_African_meta-analysis	Muscle_Skeletal	0.99989	ENSG00000172922	RNASEH2C	ribonuclease H2 subunit C
2457	11_64644075_65644075	All_African_meta-analysis	Heart_Atrial_Appendage	0.99989	ENSG00000172922	RNASEH2C	ribonuclease H2 subunit C
2457	11_64644075_65644075	All_African_meta-analysis	Colon_Sigmoid	0.99989	ENSG00000172922	RNASEH2C	ribonuclease H2 subunit C
2457	11_64644075_65644075	All_African_meta-analysis	Artery_Aorta	0.99989	ENSG00000214659	KRT8P26
2457	11_64644075_65644075	All_African_meta-analysis	Whole_Blood	0.99989	ENSG00000172922	RNASEH2C	ribonuclease H2 subunit C
2457	11_64644075_65644075	All_African_meta-analysis	Esophagus_Muscularis	0.99989	ENSG00000214659	KRT8P26
2450	11_64644075_65644075	All_African_meta-analysis	Uterus	0.99989	ENSG00000270775	EEF1A1P18
2453	11_64644075_65644075	All_African_meta-analysis	Brain_Frontal_Cortex_BA9	0.99989	ENSG00000245532	NEAT1	nuclear paraspeckle assembly transcript 1
2457	11_64644075_65644075	All_African_meta-analysis	Colon_Sigmoid	0.99989	ENSG00000245532	NEAT1	nuclear paraspeckle assembly transcript 1
2457	11_64644075_65644075	All_African_meta-analysis	Colon_Transverse	0.99989	ENSG00000255200	PGAM1P8
2457	11_64644075_65644075	All_African_meta-analysis	Cells_Cultured_fibroblasts	0.99989	ENSG00000172922	RNASEH2C	ribonuclease H2 subunit C
2457	11_64644075_65644075	All_African_meta-analysis	Thyroid	0.99989	ENSG00000255557
2457	11_64644075_65644075	All_African_meta-analysis	Skin_Sun_Exposed_Lower_leg	0.99989	ENSG00000255200	PGAM1P8
2457	11_64644075_65644075	All_African_meta-analysis	Breast_Mammary_Tissue	0.99989	ENSG00000172922	RNASEH2C	ribonuclease H2 subunit C
2457	11_64644075_65644075	All_African_meta-analysis	Lung	0.99989	ENSG00000214659	KRT8P26
2735	11_64644075_65644075	All_African_meta-analysis	Tube.NephQTL2	0.99989	ENSG00000172803	SNX32	sorting nexin 32
2278	11_64644075_65644075	All_African_meta-analysis	Brain_Spinal_cord_cervical_c-1	0.99989	ENSG00000254614	CAPN1-AS1	CAPN1 antisense RNA 1
2455	11_64644075_65644075	All_African_meta-analysis	Brain_Cerebellar_Hemisphere	0.99989	ENSG00000255200	PGAM1P8
2457	11_64644075_65644075	All_African_meta-analysis	Heart_Left_Ventricle	0.99989	ENSG00000172922	RNASEH2C	ribonuclease H2 subunit C
2457	11_64644075_65644075	All_African_meta-analysis	Artery_Tibial	0.99989	ENSG00000014216	CAPN1	calpain 1
2457	11_64644075_65644075	All_African_meta-analysis	Artery_Coronary	0.99989	ENSG00000255200	PGAM1P8
2457	11_64644075_65644075	All_African_meta-analysis	Adipose_Subcutaneous	0.99989	ENSG00000260233	ZNRD2-DT
2457	11_64644075_65644075	All_African_meta-analysis	Skin_Sun_Exposed_Lower_leg	0.99989	ENSG00000270775	EEF1A1P18
2446	11_64644075_65644075	All_African_meta-analysis	Brain_Anterior_cingulate_cortex_BA24	0.99989	ENSG00000254614	CAPN1-AS1	CAPN1 antisense RNA 1
2457	11_64644075_65644075	All_African_meta-analysis	Nerve_Tibial	0.99989	ENSG00000214659	KRT8P26
2457	11_64644075_65644075	All_African_meta-analysis	Pancreas	0.99989	ENSG00000255200	PGAM1P8
2454	11_64644075_65644075	All_African_meta-analysis	Spleen	0.99989	ENSG00000255120	OVOL1-AS1	OVOL1 antisense RNA 1
2457	11_64644075_65644075	All_African_meta-analysis	Whole_Blood	0.99989	ENSG00000245532	NEAT1	nuclear paraspeckle assembly transcript 1
2457	11_64644075_65644075	All_African_meta-analysis	Heart_Left_Ventricle	0.99989	ENSG00000255200	PGAM1P8
2457	11_64644075_65644075	All_African_meta-analysis	Adipose_Visceral_Omentum	0.99989	ENSG00000214659	KRT8P26
2457	11_64644075_65644075	All_African_meta-analysis	Adipose_Subcutaneous	0.99989	ENSG00000214659	KRT8P26
2450	11_64644075_65644075	All_African_meta-analysis	Brain_Cortex	0.99989	ENSG00000245532	NEAT1	nuclear paraspeckle assembly transcript 1
2457	11_64644075_65644075	All_African_meta-analysis	Colon_Sigmoid	0.99989	ENSG00000214659	KRT8P26
2273	11_64644075_65644075	All_African_meta-analysis	Thyroid	0.99989	ENSG00000175513	TSGA10IP	testis specific 10 interacting protein
2453	11_64644075_65644075	All_African_meta-analysis	Brain_Frontal_Cortex_BA9	0.99989	ENSG00000255200	PGAM1P8
2457	11_64644075_65644075	All_African_meta-analysis	Whole_Blood	0.99989	ENSG00000255557
2457	11_64644075_65644075	All_African_meta-analysis	Stomach	0.99989	ENSG00000173327	MAP3K11	mitogen-activated protein kinase kinase kinase 11
2457	11_64644075_65644075	All_African_meta-analysis	Cells_Cultured_fibroblasts	0.99989	ENSG00000214659	KRT8P26
2455	11_64644075_65644075	All_African_meta-analysis	Brain_Putamen_basal_ganglia	0.99989	ENSG00000245532	NEAT1	nuclear paraspeckle assembly transcript 1
2455	11_64644075_65644075	All_African_meta-analysis	Brain_Cerebellar_Hemisphere	0.99989	ENSG00000245532	NEAT1	nuclear paraspeckle assembly transcript 1
2457	11_64644075_65644075	All_African_meta-analysis	Pancreas	0.99989	ENSG00000172922	RNASEH2C	ribonuclease H2 subunit C
2439	11_64644075_65644075	All_African_meta-analysis	Brain_Amygdala	0.99989	ENSG00000254614	CAPN1-AS1	CAPN1 antisense RNA 1
2457	11_64644075_65644075	All_African_meta-analysis	Heart_Atrial_Appendage	0.99989	ENSG00000255200	PGAM1P8
2449	11_64644075_65644075	All_African_meta-analysis	Brain_Substantia_nigra	0.99989	ENSG00000254614	CAPN1-AS1	CAPN1 antisense RNA 1
2456	11_64644075_65644075	All_African_meta-analysis	Brain_Nucleus_accumbens_basal_ganglia	0.99989	ENSG00000254614	CAPN1-AS1	CAPN1 antisense RNA 1
2455	11_64644075_65644075	All_African_meta-analysis	Brain_Cerebellar_Hemisphere	0.99989	ENSG00000254614	CAPN1-AS1	CAPN1 antisense RNA 1
2457	11_64644075_65644075	All_African_meta-analysis	Heart_Atrial_Appendage	0.99989	ENSG00000254614	CAPN1-AS1	CAPN1 antisense RNA 1
2457	11_64644075_65644075	All_African_meta-analysis	Heart_Left_Ventricle	0.99989	ENSG00000254614	CAPN1-AS1	CAPN1 antisense RNA 1
2457	11_64644075_65644075	All_African_meta-analysis	Stomach	0.99989	ENSG00000254614	CAPN1-AS1	CAPN1 antisense RNA 1
2457	11_64644075_65644075	All_African_meta-analysis	Brain_Caudate_basal_ganglia	0.99989	ENSG00000254614	CAPN1-AS1	CAPN1 antisense RNA 1
2457	11_64644075_65644075	All_African_meta-analysis	Ovary	0.99989	ENSG00000254614	CAPN1-AS1	CAPN1 antisense RNA 1
2457	11_64644075_65644075	All_African_meta-analysis	Adrenal_Gland	0.99989	ENSG00000254614	CAPN1-AS1	CAPN1 antisense RNA 1
2457	11_64644075_65644075	All_African_meta-analysis	Artery_Coronary	0.99989	ENSG00000254614	CAPN1-AS1	CAPN1 antisense RNA 1
2456	11_64644075_65644075	All_African_meta-analysis	Minor_Salivary_Gland	0.99989	ENSG00000254614	CAPN1-AS1	CAPN1 antisense RNA 1
2455	11_64644075_65644075	All_African_meta-analysis	Brain_Putamen_basal_ganglia	0.99989	ENSG00000254614	CAPN1-AS1	CAPN1 antisense RNA 1
2453	11_64644075_65644075	All_African_meta-analysis	Brain_Frontal_Cortex_BA9	0.99989	ENSG00000254614	CAPN1-AS1	CAPN1 antisense RNA 1
2446	11_64644075_65644075	All_African_meta-analysis	Vagina	0.99989	ENSG00000254614	CAPN1-AS1	CAPN1 antisense RNA 1
2452	11_64644075_65644075	All_African_meta-analysis	Cells_EBV-transformed_lymphocytes	0.99989	ENSG00000254614	CAPN1-AS1	CAPN1 antisense RNA 1
2450	11_64644075_65644075	All_African_meta-analysis	Uterus	0.99989	ENSG00000254614	CAPN1-AS1	CAPN1 antisense RNA 1
2381	11_64644075_65644075	All_African_meta-analysis	Kidney_Cortex	0.99989	ENSG00000254614	CAPN1-AS1	CAPN1 antisense RNA 1
2436	11_64644075_65644075	All_African_meta-analysis	Brain_Hippocampus	0.99989	ENSG00000254614	CAPN1-AS1	CAPN1 antisense RNA 1
2457	11_64644075_65644075	All_African_meta-analysis	Nerve_Tibial	0.99989	ENSG00000254614	CAPN1-AS1	CAPN1 antisense RNA 1
2446	11_64644075_65644075	All_African_meta-analysis	Brain_Anterior_cingulate_cortex_BA24	0.99989	ENSG00000255200	PGAM1P8
2457	11_64644075_65644075	All_African_meta-analysis	Esophagus_Mucosa	0.99989	ENSG00000255200	PGAM1P8
2457	11_64644075_65644075	All_African_meta-analysis	Esophagus_Mucosa	0.99989	ENSG00000214659	KRT8P26
2438	11_64644075_65644075	All_African_meta-analysis	Artery_Tibial	0.99989	ENSG00000172500	FIBP	FGF1 intracellular binding protein
2457	11_64644075_65644075	All_African_meta-analysis	Skin_Sun_Exposed_Lower_leg	0.99989	ENSG00000172922	RNASEH2C	ribonuclease H2 subunit C
2446	11_64644075_65644075	All_African_meta-analysis	Brain_Hypothalamus	0.99989	ENSG00000245532	NEAT1	nuclear paraspeckle assembly transcript 1
3016	11_64644075_65644075	All_African_meta-analysis	Glom.NephQTL2	0.99989	ENSG00000254614	CAPN1-AS1	CAPN1 antisense RNA 1
2454	11_64644075_65644075	All_African_meta-analysis	Spleen	0.99989	ENSG00000254614	CAPN1-AS1	CAPN1 antisense RNA 1
2450	11_64644075_65644075	All_African_meta-analysis	Brain_Cortex	0.99989	ENSG00000255200	PGAM1P8
2457	11_64644075_65644075	All_African_meta-analysis	Brain_Cerebellum	0.99989	ENSG00000214659	KRT8P26
2457	11_64644075_65644075	All_African_meta-analysis	Artery_Aorta	0.99989	ENSG00000173327	MAP3K11	mitogen-activated protein kinase kinase kinase 11
2457	11_64644075_65644075	All_African_meta-analysis	Pituitary	0.99989	ENSG00000214659	KRT8P26
2457	11_64644075_65644075	All_African_meta-analysis	Esophagus_Gastroesophageal_Junction	0.99989	ENSG00000173327	MAP3K11	mitogen-activated protein kinase kinase kinase 11
2457	11_64644075_65644075	All_African_meta-analysis	Adipose_Visceral_Omentum	0.99989	ENSG00000173327	MAP3K11	mitogen-activated protein kinase kinase kinase 11
2457	11_64644075_65644075	All_African_meta-analysis	Lung	0.99989	ENSG00000173327	MAP3K11	mitogen-activated protein kinase kinase kinase 11
2457	11_64644075_65644075	All_African_meta-analysis	Prostate	0.99989	ENSG00000173327	MAP3K11	mitogen-activated protein kinase kinase kinase 11
2457	11_64644075_65644075	All_African_meta-analysis	Muscle_Skeletal	0.99989	ENSG00000173327	MAP3K11	mitogen-activated protein kinase kinase kinase 11
2457	11_64644075_65644075	All_African_meta-analysis	Skin_Not_Sun_Exposed_Suprapubic	0.99989	ENSG00000173327	MAP3K11	mitogen-activated protein kinase kinase kinase 11
2457	11_64644075_65644075	All_African_meta-analysis	Colon_Transverse	0.99989	ENSG00000173327	MAP3K11	mitogen-activated protein kinase kinase kinase 11
2457	11_64644075_65644075	All_African_meta-analysis	Brain_Cerebellum	0.99989	ENSG00000254614	CAPN1-AS1	CAPN1 antisense RNA 1
2457	11_64644075_65644075	All_African_meta-analysis	Brain_Caudate_basal_ganglia	0.99989	ENSG00000245532	NEAT1	nuclear paraspeckle assembly transcript 1
2457	11_64644075_65644075	All_African_meta-analysis	Esophagus_Muscularis	0.99989	ENSG00000173327	MAP3K11	mitogen-activated protein kinase kinase kinase 11
2457	11_64644075_65644075	All_African_meta-analysis	Pancreas	0.99989	ENSG00000173327	MAP3K11	mitogen-activated protein kinase kinase kinase 11
2457	11_64644075_65644075	All_African_meta-analysis	Skin_Sun_Exposed_Lower_leg	0.99989	ENSG00000173327	MAP3K11	mitogen-activated protein kinase kinase kinase 11
2457	11_64644075_65644075	All_African_meta-analysis	Breast_Mammary_Tissue	0.99989	ENSG00000173327	MAP3K11	mitogen-activated protein kinase kinase kinase 11
2457	11_64644075_65644075	All_African_meta-analysis	Whole_Blood	0.99989	ENSG00000173327	MAP3K11	mitogen-activated protein kinase kinase kinase 11
2454	11_64644075_65644075	All_African_meta-analysis	Spleen	0.99989	ENSG00000173327	MAP3K11	mitogen-activated protein kinase kinase kinase 11
2457	11_64644075_65644075	All_African_meta-analysis	Adipose_Subcutaneous	0.99989	ENSG00000173327	MAP3K11	mitogen-activated protein kinase kinase kinase 11
2457	11_64644075_65644075	All_African_meta-analysis	Artery_Tibial	0.99989	ENSG00000173327	MAP3K11	mitogen-activated protein kinase kinase kinase 11
2457	11_64644075_65644075	All_African_meta-analysis	Nerve_Tibial	0.99989	ENSG00000173327	MAP3K11	mitogen-activated protein kinase kinase kinase 11
2457	11_64644075_65644075	All_African_meta-analysis	Thyroid	0.99989	ENSG00000173327	MAP3K11	mitogen-activated protein kinase kinase kinase 11
2457	11_64644075_65644075	All_African_meta-analysis	Adrenal_Gland	0.99989	ENSG00000255200	PGAM1P8
2454	11_64644075_65644075	All_African_meta-analysis	Spleen	0.99989	ENSG00000255200	PGAM1P8
2457	11_64644075_65644075	All_African_meta-analysis	Heart_Atrial_Appendage	0.99989	ENSG00000110025	SNX15	sorting nexin 15
2457	11_64644075_65644075	All_African_meta-analysis	Skin_Not_Sun_Exposed_Suprapubic	0.99989	ENSG00000255200	PGAM1P8
2457	11_64644075_65644075	All_African_meta-analysis	Heart_Atrial_Appendage	0.99989	ENSG00000214659	KRT8P26
2457	11_64644075_65644075	All_African_meta-analysis	Skin_Not_Sun_Exposed_Suprapubic	0.99989	ENSG00000172922	RNASEH2C	ribonuclease H2 subunit C
2457	11_64644075_65644075	All_African_meta-analysis	Testis	0.99989	ENSG00000255120	OVOL1-AS1	OVOL1 antisense RNA 1
2457	11_64644075_65644075	All_African_meta-analysis	Esophagus_Mucosa	0.999889	ENSG00000173327	MAP3K11	mitogen-activated protein kinase kinase kinase 11
2457	11_64644075_65644075	All_African_meta-analysis	Heart_Left_Ventricle	0.999889	ENSG00000173442	EHBP1L1	EH domain binding protein 1 like 1
2457	11_64644075_65644075	All_African_meta-analysis	Artery_Tibial	0.999889	ENSG00000255200	PGAM1P8
2450	11_64644075_65644075	All_African_meta-analysis	Brain_Cortex	0.999889	ENSG00000214659	KRT8P26
2457	11_64644075_65644075	All_African_meta-analysis	Esophagus_Gastroesophageal_Junction	0.999889	ENSG00000214659	KRT8P26
2457	11_64644075_65644075	All_African_meta-analysis	Esophagus_Muscularis	0.999889	ENSG00000255200	PGAM1P8
2457	11_64644075_65644075	All_African_meta-analysis	Esophagus_Muscularis	0.999889	ENSG00000254614	CAPN1-AS1	CAPN1 antisense RNA 1
2457	11_64644075_65644075	All_African_meta-analysis	Small_Intestine_Terminal_Ileum	0.999889	ENSG00000254614	CAPN1-AS1	CAPN1 antisense RNA 1
2068	11_64644075_65644075	All_African_meta-analysis	Adipose_Visceral_Omentum	0.999889	ENSG00000175334	BANF1	BAF nuclear assembly factor 1
2457	11_64644075_65644075	All_African_meta-analysis	Prostate	0.999889	ENSG00000254614	CAPN1-AS1	CAPN1 antisense RNA 1
2069	11_64644075_65644075	All_African_meta-analysis	Cells_Cultured_fibroblasts	0.999889	ENSG00000175376	EIF1AD	eukaryotic translation initiation factor 1A domain containing
2457	11_64644075_65644075	All_African_meta-analysis	Whole_Blood	0.999889	ENSG00000255200	PGAM1P8
2457	11_64644075_65644075	All_African_meta-analysis	Cells_Cultured_fibroblasts	0.999889	ENSG00000255200	PGAM1P8
2457	11_64644075_65644075	All_African_meta-analysis	Muscle_Skeletal	0.999889	ENSG00000255200	PGAM1P8
2457	11_64644075_65644075	All_African_meta-analysis	Esophagus_Mucosa	0.999889	ENSG00000172638	EFEMP2	EGF containing fibulin extracellular matrix protein 2
3390	11_64644075_65644075	All_African_meta-analysis	TGP_Cell_lines	0.999889	ENSG00000254614.2	CAPN1-AS1	CAPN1 antisense RNA 1
2457	11_64644075_65644075	All_African_meta-analysis	Artery_Aorta	0.999889	ENSG00000254614	CAPN1-AS1	CAPN1 antisense RNA 1
2457	11_64644075_65644075	All_African_meta-analysis	Pancreas	0.999889	ENSG00000254614	CAPN1-AS1	CAPN1 antisense RNA 1
2457	11_64644075_65644075	All_African_meta-analysis	Esophagus_Gastroesophageal_Junction	0.999889	ENSG00000254614	CAPN1-AS1	CAPN1 antisense RNA 1
2457	11_64644075_65644075	All_African_meta-analysis	Colon_Sigmoid	0.999889	ENSG00000254614	CAPN1-AS1	CAPN1 antisense RNA 1
2457	11_64644075_65644075	All_African_meta-analysis	Skin_Sun_Exposed_Lower_leg	0.999889	ENSG00000254614	CAPN1-AS1	CAPN1 antisense RNA 1
2457	11_64644075_65644075	All_African_meta-analysis	Artery_Aorta	0.999889	ENSG00000255200	PGAM1P8
2457	11_64644075_65644075	All_African_meta-analysis	Pituitary	0.999889	ENSG00000254614	CAPN1-AS1	CAPN1 antisense RNA 1
2735	11_64644075_65644075	All_African_meta-analysis	Tube.NephQTL2	0.999889	ENSG00000254614	CAPN1-AS1	CAPN1 antisense RNA 1
2457	11_64644075_65644075	All_African_meta-analysis	Lung	0.999889	ENSG00000254614	CAPN1-AS1	CAPN1 antisense RNA 1
2457	11_64644075_65644075	All_African_meta-analysis	Whole_Blood	0.999889	ENSG00000254614	CAPN1-AS1	CAPN1 antisense RNA 1
2457	11_64644075_65644075	All_African_meta-analysis	Artery_Tibial	0.999889	ENSG00000254614	CAPN1-AS1	CAPN1 antisense RNA 1
2457	11_64644075_65644075	All_African_meta-analysis	Adipose_Visceral_Omentum	0.999889	ENSG00000254614	CAPN1-AS1	CAPN1 antisense RNA 1
2457	11_64644075_65644075	All_African_meta-analysis	Adipose_Subcutaneous	0.999889	ENSG00000254614	CAPN1-AS1	CAPN1 antisense RNA 1
2457	11_64644075_65644075	All_African_meta-analysis	Cells_Cultured_fibroblasts	0.999889	ENSG00000254614	CAPN1-AS1	CAPN1 antisense RNA 1
2457	11_64644075_65644075	All_African_meta-analysis	Muscle_Skeletal	0.999889	ENSG00000254614	CAPN1-AS1	CAPN1 antisense RNA 1
2457	11_64644075_65644075	All_African_meta-analysis	Colon_Transverse	0.999889	ENSG00000254614	CAPN1-AS1	CAPN1 antisense RNA 1
2450	11_64644075_65644075	All_African_meta-analysis	Brain_Cortex	0.999889	ENSG00000254614	CAPN1-AS1	CAPN1 antisense RNA 1
2457	11_64644075_65644075	All_African_meta-analysis	Stomach	0.999889	ENSG00000245532	NEAT1	nuclear paraspeckle assembly transcript 1
2457	11_64644075_65644075	All_African_meta-analysis	Artery_Tibial	0.999889	ENSG00000172638	EFEMP2	EGF containing fibulin extracellular matrix protein 2
2457	11_64644075_65644075	All_African_meta-analysis	Pituitary	0.999889	ENSG00000255200	PGAM1P8
2457	11_64644075_65644075	All_African_meta-analysis	Skin_Sun_Exposed_Lower_leg	0.999889	ENSG00000168060	NAALADL1	N-acetylated alpha-linked acidic dipeptidase like 1
2457	11_64644075_65644075	All_African_meta-analysis	Adipose_Subcutaneous	0.999889	ENSG00000168056	LTBP3	latent transforming growth factor beta binding protein 3
2457	11_64644075_65644075	All_African_meta-analysis	Whole_Blood	0.999889	ENSG00000204710	SPDYC	speedy/RINGO cell cycle regulator family member C
2457	11_64644075_65644075	All_African_meta-analysis	Heart_Left_Ventricle	0.999889	ENSG00000110025	SNX15	sorting nexin 15
2457	11_64644075_65644075	All_African_meta-analysis	Muscle_Skeletal	0.999889	ENSG00000162298	SYVN1	synoviolin 1
2457	11_64644075_65644075	All_African_meta-analysis	Whole_Blood	0.999889	ENSG00000168056	LTBP3	latent transforming growth factor beta binding protein 3
2457	11_64644075_65644075	All_African_meta-analysis	Heart_Atrial_Appendage	0.999889	ENSG00000173327	MAP3K11	mitogen-activated protein kinase kinase kinase 11
2449	11_64644075_65644075	All_African_meta-analysis	Cells_Cultured_fibroblasts	0.999889	ENSG00000172543	CTSW	cathepsin W
2457	11_64644075_65644075	All_African_meta-analysis	Artery_Aorta	0.999889	ENSG00000245532	NEAT1	nuclear paraspeckle assembly transcript 1
2457	11_64644075_65644075	All_African_meta-analysis	Esophagus_Mucosa	0.999889	ENSG00000254470	AP5B1	adaptor related protein complex 5 subunit beta 1
2457	11_64644075_65644075	All_African_meta-analysis	Nerve_Tibial	0.999889	ENSG00000213445	SIPA1	signal-induced proliferation-associated 1
2438	11_64644075_65644075	All_African_meta-analysis	Adipose_Subcutaneous	0.999889	ENSG00000172500	FIBP	FGF1 intracellular binding protein
2438	11_64644075_65644075	All_African_meta-analysis	Esophagus_Muscularis	0.999889	ENSG00000172500	FIBP	FGF1 intracellular binding protein
2457	11_64644075_65644075	All_African_meta-analysis	Artery_Coronary	0.999889	ENSG00000173327	MAP3K11	mitogen-activated protein kinase kinase kinase 11
2069	11_64644075_65644075	All_African_meta-analysis	Muscle_Skeletal	0.999888	ENSG00000175376	EIF1AD	eukaryotic translation initiation factor 1A domain containing
2069	11_64644075_65644075	All_African_meta-analysis	Skin_Sun_Exposed_Lower_leg	0.999888	ENSG00000175376	EIF1AD	eukaryotic translation initiation factor 1A domain containing
3380	11_64644075_65644075	All_African_meta-analysis	TGP_Cell_lines	0.999888	ENSG00000172543.9	CTSW	cathepsin W
3358	11_64644075_65644075	All_African_meta-analysis	TGP_Cell_lines	0.999888	ENSG00000172500.13	FIBP	FGF1 intracellular binding protein
2728	11_64644075_65644075	All_African_meta-analysis	Tube.NephQTL2	0.999888	ENSG00000172543	CTSW	cathepsin W
2449	11_64644075_65644075	All_African_meta-analysis	Muscle_Skeletal	0.999888	ENSG00000172543	CTSW	cathepsin W
2438	11_64644075_65644075	All_African_meta-analysis	Heart_Atrial_Appendage	0.999888	ENSG00000172500	FIBP	FGF1 intracellular binding protein
2438	11_64644075_65644075	All_African_meta-analysis	Heart_Left_Ventricle	0.999888	ENSG00000172500	FIBP	FGF1 intracellular binding protein
2438	11_64644075_65644075	All_African_meta-analysis	Testis	0.999888	ENSG00000172500	FIBP	FGF1 intracellular binding protein
2438	11_64644075_65644075	All_African_meta-analysis	Cells_Cultured_fibroblasts	0.999888	ENSG00000172500	FIBP	FGF1 intracellular binding protein
2438	11_64644075_65644075	All_African_meta-analysis	Muscle_Skeletal	0.999888	ENSG00000172500	FIBP	FGF1 intracellular binding protein
2449	11_64644075_65644075	All_African_meta-analysis	Prostate	0.999888	ENSG00000172543	CTSW	cathepsin W
2449	11_64644075_65644075	All_African_meta-analysis	Adipose_Subcutaneous	0.999888	ENSG00000172543	CTSW	cathepsin W
2449	11_64644075_65644075	All_African_meta-analysis	Adipose_Visceral_Omentum	0.999888	ENSG00000172543	CTSW	cathepsin W
2449	11_64644075_65644075	All_African_meta-analysis	Artery_Aorta	0.999888	ENSG00000172543	CTSW	cathepsin W
2449	11_64644075_65644075	All_African_meta-analysis	Artery_Coronary	0.999888	ENSG00000172543	CTSW	cathepsin W
2449	11_64644075_65644075	All_African_meta-analysis	Artery_Tibial	0.999888	ENSG00000172543	CTSW	cathepsin W
2449	11_64644075_65644075	All_African_meta-analysis	Breast_Mammary_Tissue	0.999888	ENSG00000172543	CTSW	cathepsin W
2449	11_64644075_65644075	All_African_meta-analysis	Colon_Sigmoid	0.999888	ENSG00000172543	CTSW	cathepsin W
2449	11_64644075_65644075	All_African_meta-analysis	Colon_Transverse	0.999888	ENSG00000172543	CTSW	cathepsin W
2449	11_64644075_65644075	All_African_meta-analysis	Esophagus_Gastroesophageal_Junction	0.999888	ENSG00000172543	CTSW	cathepsin W
2449	11_64644075_65644075	All_African_meta-analysis	Esophagus_Mucosa	0.999888	ENSG00000172543	CTSW	cathepsin W
2449	11_64644075_65644075	All_African_meta-analysis	Esophagus_Muscularis	0.999888	ENSG00000172543	CTSW	cathepsin W
2449	11_64644075_65644075	All_African_meta-analysis	Lung	0.999888	ENSG00000172543	CTSW	cathepsin W
2449	11_64644075_65644075	All_African_meta-analysis	Nerve_Tibial	0.999888	ENSG00000172543	CTSW	cathepsin W
2449	11_64644075_65644075	All_African_meta-analysis	Pancreas	0.999888	ENSG00000172543	CTSW	cathepsin W
2449	11_64644075_65644075	All_African_meta-analysis	Skin_Not_Sun_Exposed_Suprapubic	0.999888	ENSG00000172543	CTSW	cathepsin W
2449	11_64644075_65644075	All_African_meta-analysis	Skin_Sun_Exposed_Lower_leg	0.999888	ENSG00000172543	CTSW	cathepsin W
2449	11_64644075_65644075	All_African_meta-analysis	Stomach	0.999888	ENSG00000172543	CTSW	cathepsin W
2449	11_64644075_65644075	All_African_meta-analysis	Whole_Blood	0.999888	ENSG00000172543	CTSW	cathepsin W
2449	11_64644075_65644075	All_African_meta-analysis	Small_Intestine_Terminal_Ileum	0.999888	ENSG00000172543	CTSW	cathepsin W
2449	11_64644075_65644075	All_African_meta-analysis	Liver	0.999888	ENSG00000172543	CTSW	cathepsin W
2449	11_64644075_65644075	All_African_meta-analysis	Heart_Atrial_Appendage	0.999888	ENSG00000172543	CTSW	cathepsin W
2449	11_64644075_65644075	All_African_meta-analysis	Thyroid	0.999888	ENSG00000172543	CTSW	cathepsin W
2448	11_64644075_65644075	All_African_meta-analysis	Minor_Salivary_Gland	0.999888	ENSG00000172543	CTSW	cathepsin W
2449	11_64644075_65644075	All_African_meta-analysis	Adrenal_Gland	0.999888	ENSG00000172543	CTSW	cathepsin W
2438	11_64644075_65644075	All_African_meta-analysis	Vagina	0.999888	ENSG00000172543	CTSW	cathepsin W
2446	11_64644075_65644075	All_African_meta-analysis	Spleen	0.999888	ENSG00000172543	CTSW	cathepsin W
2449	11_64644075_65644075	All_African_meta-analysis	Pituitary	0.999888	ENSG00000172543	CTSW	cathepsin W
2431	11_64644075_65644075	All_African_meta-analysis	Brain_Cortex	0.999888	ENSG00000172500	FIBP	FGF1 intracellular binding protein
2449	11_64644075_65644075	All_African_meta-analysis	Ovary	0.999888	ENSG00000172543	CTSW	cathepsin W
2457	11_64644075_65644075	All_African_meta-analysis	Whole_Blood	0.999888	ENSG00000168060	NAALADL1	N-acetylated alpha-linked acidic dipeptidase like 1
2457	11_64644075_65644075	All_African_meta-analysis	Artery_Tibial	0.999888	ENSG00000133884	DPF2	double PHD fingers 2
2457	11_64644075_65644075	All_African_meta-analysis	Adipose_Visceral_Omentum	0.999888	ENSG00000270775	EEF1A1P18
2457	11_64644075_65644075	All_African_meta-analysis	Testis	0.999888	ENSG00000110025	SNX15	sorting nexin 15
2457	11_64644075_65644075	All_African_meta-analysis	Cells_Cultured_fibroblasts	0.999888	ENSG00000197847	SLC22A20P
2457	11_64644075_65644075	All_African_meta-analysis	Breast_Mammary_Tissue	0.999888	ENSG00000168056	LTBP3	latent transforming growth factor beta binding protein 3
2457	11_64644075_65644075	All_African_meta-analysis	Esophagus_Mucosa	0.999888	ENSG00000213445	SIPA1	signal-induced proliferation-associated 1
2457	11_64644075_65644075	All_African_meta-analysis	Nerve_Tibial	0.999888	ENSG00000168056	LTBP3	latent transforming growth factor beta binding protein 3
2455	11_64644075_65644075	All_African_meta-analysis	Brain_Cerebellar_Hemisphere	0.999888	ENSG00000214659	KRT8P26
2457	11_64644075_65644075	All_African_meta-analysis	Muscle_Skeletal	0.999888	ENSG00000172638	EFEMP2	EGF containing fibulin extracellular matrix protein 2
2068	11_64644075_65644075	All_African_meta-analysis	Thyroid	0.999888	ENSG00000175334	BANF1	BAF nuclear assembly factor 1
2457	11_64644075_65644075	All_African_meta-analysis	Artery_Tibial	0.999887	ENSG00000254470	AP5B1	adaptor related protein complex 5 subunit beta 1
2442	11_64644075_65644075	All_African_meta-analysis	Uterus	0.999887	ENSG00000172543	CTSW	cathepsin W
2457	11_64644075_65644075	All_African_meta-analysis	Cells_Cultured_fibroblasts	0.999887	ENSG00000213445	SIPA1	signal-induced proliferation-associated 1
2457	11_64644075_65644075	All_African_meta-analysis	Colon_Sigmoid	0.999887	ENSG00000173327	MAP3K11	mitogen-activated protein kinase kinase kinase 11
2433	11_64644075_65644075	All_African_meta-analysis	Cells_EBV-transformed_lymphocytes	0.999887	ENSG00000172500	FIBP	FGF1 intracellular binding protein
2456	11_64644075_65644075	All_African_meta-analysis	Brain_Nucleus_accumbens_basal_ganglia	0.999887	ENSG00000172803	SNX32	sorting nexin 32
2912	17_37234482_38234482	All_African_meta-analysis	Muscle_Skeletal	0.999887	ENSG00000141744	PNMT	phenylethanolamine N-methyltransferase
2457	11_64644075_65644075	All_African_meta-analysis	Esophagus_Muscularis	0.999886	ENSG00000197847	SLC22A20P
2457	11_64644075_65644075	All_African_meta-analysis	Cells_Cultured_fibroblasts	0.999886	ENSG00000172757	CFL1	cofilin 1
2452	11_64644075_65644075	All_African_meta-analysis	Cells_EBV-transformed_lymphocytes	0.999886	ENSG00000172818	OVOL1	ovo like transcriptional repressor 1
2457	11_64644075_65644075	All_African_meta-analysis	Colon_Sigmoid	0.999886	ENSG00000014138	POLA2	DNA polymerase alpha 2, accessory subunit
2452	11_64644075_65644075	All_African_meta-analysis	Cells_EBV-transformed_lymphocytes	0.999886	ENSG00000172803	SNX32	sorting nexin 32
2450	11_64644075_65644075	All_African_meta-analysis	Brain_Cortex	0.999885	ENSG00000110025	SNX15	sorting nexin 15
4414	21_44912872_45912872	All_African_meta-analysis	Tube.NephQTL2	0.999885	ENSG00000275799
2457	11_64644075_65644075	All_African_meta-analysis	Muscle_Skeletal	0.999885	ENSG00000168056	LTBP3	latent transforming growth factor beta binding protein 3
2457	11_64644075_65644075	All_African_meta-analysis	Esophagus_Muscularis	0.999884	ENSG00000172638	EFEMP2	EGF containing fibulin extracellular matrix protein 2
2457	11_64644075_65644075	All_African_meta-analysis	Ovary	0.999884	ENSG00000214659	KRT8P26
2457	11_64644075_65644075	All_African_meta-analysis	Breast_Mammary_Tissue	0.999884	ENSG00000197847	SLC22A20P
2068	11_64644075_65644075	All_African_meta-analysis	Esophagus_Mucosa	0.999884	ENSG00000175334	BANF1	BAF nuclear assembly factor 1
2457	11_64644075_65644075	All_African_meta-analysis	Artery_Tibial	0.999884	ENSG00000110025	SNX15	sorting nexin 15
2457	11_64644075_65644075	All_African_meta-analysis	Whole_Blood	0.999883	ENSG00000197847	SLC22A20P
2457	11_64644075_65644075	All_African_meta-analysis	Pancreas	0.999882	ENSG00000172818	OVOL1	ovo like transcriptional repressor 1
2457	11_64644075_65644075	All_African_meta-analysis	Colon_Transverse	0.999881	ENSG00000213465	ARL2	ADP ribosylation factor like GTPase 2
2449	11_64644075_65644075	All_African_meta-analysis	Brain_Substantia_nigra	0.99988	ENSG00000245532	NEAT1	nuclear paraspeckle assembly transcript 1
2457	11_64644075_65644075	All_African_meta-analysis	Adipose_Visceral_Omentum	0.99988	ENSG00000014138	POLA2	DNA polymerase alpha 2, accessory subunit
2457	11_64644075_65644075	All_African_meta-analysis	Cells_Cultured_fibroblasts	0.99988	ENSG00000172638	EFEMP2	EGF containing fibulin extracellular matrix protein 2
2457	11_64644075_65644075	All_African_meta-analysis	Brain_Cerebellum	0.999879	ENSG00000172638	EFEMP2	EGF containing fibulin extracellular matrix protein 2
3564	6_160174632_161174632	All_African_meta-analysis	Skin_Sun_Exposed_Lower_leg	0.999878	ENSG00000175003	SLC22A1	solute carrier family 22 member 1
2457	11_64644075_65644075	All_African_meta-analysis	Heart_Atrial_Appendage	0.999878	ENSG00000173727	FAUP4
2457	11_64644075_65644075	All_African_meta-analysis	Colon_Transverse	0.999877	ENSG00000214659	KRT8P26
2457	11_64644075_65644075	All_African_meta-analysis	Pituitary	0.999876	ENSG00000014138	POLA2	DNA polymerase alpha 2, accessory subunit
2457	11_64644075_65644075	All_African_meta-analysis	Artery_Coronary	0.999875	ENSG00000214659	KRT8P26
2457	11_64644075_65644075	All_African_meta-analysis	Artery_Aorta	0.999875	ENSG00000133884	DPF2	double PHD fingers 2
2068	11_64644075_65644075	All_African_meta-analysis	Lung	0.999874	ENSG00000175334	BANF1	BAF nuclear assembly factor 1
3564	6_160174632_161174632	All_African_meta-analysis	Artery_Tibial	0.999873	ENSG00000146453	PNLDC1	PARN like ribonuclease domain containing exonuclease 1
3240	15_44721609_45721609	All_African_meta-analysis	Minor_Salivary_Gland	0.999873	ENSG00000171763	AFG2B	AFG2 AAA ATPase homolog B
2457	11_64644075_65644075	All_African_meta-analysis	Skin_Sun_Exposed_Lower_leg	0.999873	ENSG00000168056	LTBP3	latent transforming growth factor beta binding protein 3
2912	17_37234482_38234482	All_African_meta-analysis	Cells_Cultured_fibroblasts	0.999872	ENSG00000108306	FBXL20	F-box and leucine rich repeat protein 20
2457	11_64644075_65644075	All_African_meta-analysis	Esophagus_Mucosa	0.999872	ENSG00000173727	FAUP4
2457	11_64644075_65644075	All_African_meta-analysis	Esophagus_Muscularis	0.999871	ENSG00000173727	FAUP4
2457	11_64644075_65644075	All_African_meta-analysis	Brain_Cerebellum	0.99987	ENSG00000197136	PCNX3	pecanex 3
3136	15_45639843_46639843	All_African_meta-analysis	Vagina	0.999869	ENSG00000259520	SLC28A2-AS1
2457	11_64644075_65644075	All_African_meta-analysis	Muscle_Skeletal	0.999869	ENSG00000173727	FAUP4
3141	15_44721609_45721609	All_African_meta-analysis	Kidney_Cortex	0.999867	ENSG00000259520	SLC28A2-AS1
2457	11_64644075_65644075	All_African_meta-analysis	Cells_Cultured_fibroblasts	0.999866	ENSG00000173727	FAUP4
2436	11_64644075_65644075	All_African_meta-analysis	Brain_Hippocampus	0.999866	ENSG00000172803	SNX32	sorting nexin 32
3564	6_160174632_161174632	All_African_meta-analysis	Artery_Tibial	0.999866	ENSG00000175003	SLC22A1	solute carrier family 22 member 1
2457	11_64644075_65644075	All_African_meta-analysis	Esophagus_Gastroesophageal_Junction	0.999865	ENSG00000173727	FAUP4
2457	11_64644075_65644075	All_African_meta-analysis	Prostate	0.999864	ENSG00000245532	NEAT1	nuclear paraspeckle assembly transcript 1
3241	15_44721609_45721609	All_African_meta-analysis	Artery_Coronary	0.999864	ENSG00000171763	AFG2B	AFG2 AAA ATPase homolog B
2457	11_64644075_65644075	All_African_meta-analysis	Lung	0.999863	ENSG00000270775	EEF1A1P18
3379	15_45639843_46639843	All_African_meta-analysis	Artery_Coronary	0.99986	ENSG00000171763	AFG2B	AFG2 AAA ATPase homolog B
2457	11_64644075_65644075	All_African_meta-analysis	Nerve_Tibial	0.999858	ENSG00000172757	CFL1	cofilin 1
2457	11_64644075_65644075	All_African_meta-analysis	Heart_Atrial_Appendage	0.999857	ENSG00000270775	EEF1A1P18
2457	11_64644075_65644075	All_African_meta-analysis	Colon_Transverse	0.999856	ENSG00000110025	SNX15	sorting nexin 15
3538	6_160174632_161174632	All_African_meta-analysis	Brain_Substantia_nigra	0.999856	ENSG00000112110	MRPL18	mitochondrial ribosomal protein L18
2457	11_64644075_65644075	All_African_meta-analysis	Nerve_Tibial	0.999854	ENSG00000173727	FAUP4
2457	11_64644075_65644075	All_African_meta-analysis	Artery_Coronary	0.999853	ENSG00000270775	EEF1A1P18
3242	15_44721609_45721609	All_African_meta-analysis	Lung	0.999852	ENSG00000171763	AFG2B	AFG2 AAA ATPase homolog B
2457	11_64644075_65644075	All_African_meta-analysis	Adipose_Visceral_Omentum	0.999849	ENSG00000197847	SLC22A20P
2457	11_64644075_65644075	All_African_meta-analysis	Small_Intestine_Terminal_Ileum	0.999848	ENSG00000173327	MAP3K11	mitogen-activated protein kinase kinase kinase 11
3380	15_45639843_46639843	All_African_meta-analysis	Minor_Salivary_Gland	0.999847	ENSG00000171763	AFG2B	AFG2 AAA ATPase homolog B
2584	15_75713980_76713980	All_African_meta-analysis	Thyroid	0.999847	ENSG00000169752	NRG4	neuregulin 4
2454	11_64644075_65644075	All_African_meta-analysis	Spleen	0.999843	ENSG00000260233	ZNRD2-DT
2457	11_64644075_65644075	All_African_meta-analysis	Artery_Tibial	0.999841	ENSG00000168060	NAALADL1	N-acetylated alpha-linked acidic dipeptidase like 1
2456	11_64644075_65644075	All_African_meta-analysis	Brain_Nucleus_accumbens_basal_ganglia	0.999841	ENSG00000255120	OVOL1-AS1	OVOL1 antisense RNA 1
2457	11_64644075_65644075	All_African_meta-analysis	Cells_Cultured_fibroblasts	0.99984	ENSG00000213465	ARL2	ADP ribosylation factor like GTPase 2
3224	15_44721609_45721609	All_African_meta-analysis	Brain_Substantia_nigra	0.999838	ENSG00000259433
2456	11_64644075_65644075	All_African_meta-analysis	Brain_Nucleus_accumbens_basal_ganglia	0.999835	ENSG00000172922	RNASEH2C	ribonuclease H2 subunit C
2457	11_64644075_65644075	All_African_meta-analysis	Esophagus_Muscularis	0.999833	ENSG00000260233	ZNRD2-DT
2457	11_64644075_65644075	All_African_meta-analysis	Esophagus_Gastroesophageal_Junction	0.999832	ENSG00000197136	PCNX3	pecanex 3
3564	6_160174632_161174632	All_African_meta-analysis	Nerve_Tibial	0.999831	ENSG00000175003	SLC22A1	solute carrier family 22 member 1
2457	11_64644075_65644075	All_African_meta-analysis	Heart_Atrial_Appendage	0.999829	ENSG00000197847	SLC22A20P
3382	15_45639843_46639843	All_African_meta-analysis	Lung	0.999826	ENSG00000171763	AFG2B	AFG2 AAA ATPase homolog B
3241	15_44721609_45721609	All_African_meta-analysis	Adrenal_Gland	0.999821	ENSG00000137860	SLC28A2	solute carrier family 28 member 2
2457	11_64644075_65644075	All_African_meta-analysis	Adipose_Subcutaneous	0.99982	ENSG00000133884	DPF2	double PHD fingers 2
2457	11_64644075_65644075	All_African_meta-analysis	Cells_Cultured_fibroblasts	0.999817	ENSG00000014138	POLA2	DNA polymerase alpha 2, accessory subunit
3016	11_64644075_65644075	All_African_meta-analysis	Glom.NephQTL2	0.999816	ENSG00000162298	SYVN1	synoviolin 1
2457	11_64644075_65644075	All_African_meta-analysis	Testis	0.999815	ENSG00000173327	MAP3K11	mitogen-activated protein kinase kinase kinase 11
2068	11_64644075_65644075	All_African_meta-analysis	Cells_Cultured_fibroblasts	0.999814	ENSG00000175334	BANF1	BAF nuclear assembly factor 1
2455	11_64644075_65644075	All_African_meta-analysis	Brain_Putamen_basal_ganglia	0.999813	ENSG00000110025	SNX15	sorting nexin 15
2903	17_37234482_38234482	All_African_meta-analysis	Brain_Nucleus_accumbens_basal_ganglia	0.99981	ENSG00000141750	STAC2	SH3 and cysteine rich domain 2
3242	15_44721609_45721609	All_African_meta-analysis	Spleen	0.999809	ENSG00000140263	SORD	sorbitol dehydrogenase
2457	11_64644075_65644075	All_African_meta-analysis	Liver	0.999805	ENSG00000255200	PGAM1P8
3459	6_160174632_161174632	All_African_meta-analysis	Breast_Mammary_Tissue	0.9998	ENSG00000146457	WTAP	WT1 associated protein
2436	11_64644075_65644075	All_African_meta-analysis	Brain_Hippocampus	0.9998	ENSG00000245532	NEAT1	nuclear paraspeckle assembly transcript 1
2457	11_64644075_65644075	All_African_meta-analysis	Esophagus_Muscularis	0.999798	ENSG00000197136	PCNX3	pecanex 3
3564	6_160174632_161174632	All_African_meta-analysis	Spleen	0.999797	ENSG00000112110	MRPL18	mitochondrial ribosomal protein L18
2457	11_64644075_65644075	All_African_meta-analysis	Muscle_Skeletal	0.99979	ENSG00000133884	DPF2	double PHD fingers 2
3564	6_160174632_161174632	All_African_meta-analysis	Thyroid	0.999783	ENSG00000198670	LPA	lipoprotein(a)
2457	11_64644075_65644075	All_African_meta-analysis	Stomach	0.999782	ENSG00000214659	KRT8P26
2457	11_64644075_65644075	All_African_meta-analysis	Testis	0.999778	ENSG00000197136	PCNX3	pecanex 3
2584	15_75713980_76713980	All_African_meta-analysis	Whole_Blood	0.99977	ENSG00000259514
2413	15_75713980_76713980	All_African_meta-analysis	Thyroid	0.999769	ENSG00000140398	NEIL1	nei like DNA glycosylase 1
3564	6_160174632_161174632	All_African_meta-analysis	Cells_Cultured_fibroblasts	0.999764	ENSG00000120438	TCP1	t-complex 1
4414	21_44912872_45912872	All_African_meta-analysis	Tube.NephQTL2	0.999764	ENSG00000160221	GATD3	glutamine amidotransferase class 1 domain containing 3
2402	15_75713980_76713980	All_African_meta-analysis	Minor_Salivary_Gland	0.999762	ENSG00000260274
2457	11_64644075_65644075	All_African_meta-analysis	Thyroid	0.999759	ENSG00000172732	MUS81	MUS81 structure-specific endonuclease subunit
3556	6_160174632_161174632	All_African_meta-analysis	Pituitary	0.999756	ENSG00000112110	MRPL18	mitochondrial ribosomal protein L18
2584	15_75713980_76713980	All_African_meta-analysis	Brain_Cerebellar_Hemisphere	0.999755	ENSG00000260288		uncharacterized LOC101929408
3242	15_44721609_45721609	All_African_meta-analysis	Testis	0.999752	ENSG00000138606	SHF	Src homology 2 domain containing F
2457	11_64644075_65644075	All_African_meta-analysis	Heart_Left_Ventricle	0.999749	ENSG00000173327	MAP3K11	mitogen-activated protein kinase kinase kinase 11
2457	11_64644075_65644075	All_African_meta-analysis	Pancreas	0.999748	ENSG00000172638	EFEMP2	EGF containing fibulin extracellular matrix protein 2
2457	11_64644075_65644075	All_African_meta-analysis	Adipose_Subcutaneous	0.999748	ENSG00000110025	SNX15	sorting nexin 15
2457	11_64644075_65644075	All_African_meta-analysis	Brain_Cerebellum	0.999745	ENSG00000172818	OVOL1	ovo like transcriptional repressor 1
2457	11_64644075_65644075	All_African_meta-analysis	Artery_Tibial	0.999744	ENSG00000213465	ARL2	ADP ribosylation factor like GTPase 2
3234	15_44721609_45721609	All_African_meta-analysis	Brain_Hippocampus	0.999741	ENSG00000185880	TRIM69	tripartite motif containing 69
3564	6_160174632_161174632	All_African_meta-analysis	Breast_Mammary_Tissue	0.99974	ENSG00000120437	ACAT2	acetyl-CoA acetyltransferase 2
2457	11_64644075_65644075	All_African_meta-analysis	Skin_Not_Sun_Exposed_Suprapubic	0.999738	ENSG00000214659	KRT8P26
3564	6_160174632_161174632	All_African_meta-analysis	Muscle_Skeletal	0.999735	ENSG00000120437	ACAT2	acetyl-CoA acetyltransferase 2
2457	11_64644075_65644075	All_African_meta-analysis	Nerve_Tibial	0.999735	ENSG00000197847	SLC22A20P
2455	11_64644075_65644075	All_African_meta-analysis	Brain_Cerebellar_Hemisphere	0.999733	ENSG00000172818	OVOL1	ovo like transcriptional repressor 1
2450	11_64644075_65644075	All_African_meta-analysis	Brain_Cortex	0.999732	ENSG00000172818	OVOL1	ovo like transcriptional repressor 1
3459	6_160174632_161174632	All_African_meta-analysis	Pancreas	0.999732	ENSG00000146457	WTAP	WT1 associated protein
3564	6_160174632_161174632	All_African_meta-analysis	Skin_Not_Sun_Exposed_Suprapubic	0.99973	ENSG00000175003	SLC22A1	solute carrier family 22 member 1
3564	6_160174632_161174632	All_African_meta-analysis	Stomach	0.999726	ENSG00000112110	MRPL18	mitochondrial ribosomal protein L18
2369	17_37234482_38234482	All_African_meta-analysis	Artery_Tibial	0.999724	ENSG00000263874	LASP1NB	LASP1 neighbor
2457	11_64644075_65644075	All_African_meta-analysis	Colon_Sigmoid	0.999718	ENSG00000260233	ZNRD2-DT
2457	11_64644075_65644075	All_African_meta-analysis	Muscle_Skeletal	0.999717	ENSG00000176973	FAM89B	family with sequence similarity 89 member B
1473	15_75713980_76713980	All_African_meta-analysis	Ovary	0.99971	ENSG00000140386	SCAPER	S-phase cyclin A associated protein in the ER
2584	15_75713980_76713980	All_African_meta-analysis	Prostate	0.99971	ENSG00000169752	NRG4	neuregulin 4
2457	11_64644075_65644075	All_African_meta-analysis	Brain_Caudate_basal_ganglia	0.999709	ENSG00000172803	SNX32	sorting nexin 32
2457	11_64644075_65644075	All_African_meta-analysis	Adipose_Subcutaneous	0.999708	ENSG00000168061	SAC3D1	SAC3 domain containing 1
2582	15_75713980_76713980	All_African_meta-analysis	Small_Intestine_Terminal_Ileum	0.999706	ENSG00000259422		uncharacterized LOC101929439
2457	11_64644075_65644075	All_African_meta-analysis	Thyroid	0.9997	ENSG00000197136	PCNX3	pecanex 3
2584	15_75713980_76713980	All_African_meta-analysis	Colon_Transverse	0.9997	ENSG00000169371	SNUPN	snurportin 1
2457	11_64644075_65644075	All_African_meta-analysis	Adipose_Visceral_Omentum	0.999697	ENSG00000168060	NAALADL1	N-acetylated alpha-linked acidic dipeptidase like 1
2068	11_64644075_65644075	All_African_meta-analysis	Artery_Tibial	0.999695	ENSG00000175334	BANF1	BAF nuclear assembly factor 1
2457	11_64644075_65644075	All_African_meta-analysis	Thyroid	0.999689	ENSG00000172818	OVOL1	ovo like transcriptional repressor 1
2434	11_64644075_65644075	All_African_meta-analysis	Brain_Frontal_Cortex_BA9	0.999673	ENSG00000172500	FIBP	FGF1 intracellular binding protein
2301	15_75713980_76713980	All_African_meta-analysis	Kidney_Cortex	0.999673	ENSG00000140400	MAN2C1	mannosidase alpha class 2C member 1
2457	11_64644075_65644075	All_African_meta-analysis	Lung	0.999668	ENSG00000133884	DPF2	double PHD fingers 2
3564	6_160174632_161174632	All_African_meta-analysis	Esophagus_Gastroesophageal_Junction	0.999654	ENSG00000197081	IGF2R	insulin like growth factor 2 receptor
2369	17_37234482_38234482	All_African_meta-analysis	Esophagus_Muscularis	0.999653	ENSG00000263874	LASP1NB	LASP1 neighbor
3054	15_45639843_46639843	All_African_meta-analysis	Artery_Coronary	0.999652	ENSG00000137860	SLC28A2	solute carrier family 28 member 2
2912	17_37234482_38234482	All_African_meta-analysis	Colon_Transverse	0.999646	ENSG00000108306	FBXL20	F-box and leucine rich repeat protein 20
2068	11_64644075_65644075	All_African_meta-analysis	Adipose_Subcutaneous	0.999643	ENSG00000175334	BANF1	BAF nuclear assembly factor 1
2912	17_37234482_38234482	All_African_meta-analysis	Cells_Cultured_fibroblasts	0.999637	ENSG00000108344	PSMD3	proteasome 26S subunit, non-ATPase 3
3564	6_160174632_161174632	All_African_meta-analysis	Prostate	0.999636	ENSG00000112110	MRPL18	mitochondrial ribosomal protein L18
3242	15_44721609_45721609	All_African_meta-analysis	Muscle_Skeletal	0.999634	ENSG00000138606	SHF	Src homology 2 domain containing F
2369	17_37234482_38234482	All_African_meta-analysis	Heart_Left_Ventricle	0.999633	ENSG00000263874	LASP1NB	LASP1 neighbor
3242	15_44721609_45721609	All_African_meta-analysis	Whole_Blood	0.999631	ENSG00000140263	SORD	sorbitol dehydrogenase
3564	6_160174632_161174632	All_African_meta-analysis	Esophagus_Mucosa	0.999631	ENSG00000213073	CHP1P2
2584	15_75713980_76713980	All_African_meta-analysis	Esophagus_Muscularis	0.99963	ENSG00000173548	SNX33	sorting nexin 33
3233	15_44721609_45721609	All_African_meta-analysis	Vagina	0.999625	ENSG00000137860	SLC28A2	solute carrier family 28 member 2
2369	17_37234482_38234482	All_African_meta-analysis	Nerve_Tibial	0.99962	ENSG00000263874	LASP1NB	LASP1 neighbor
2413	15_75713980_76713980	All_African_meta-analysis	Artery_Tibial	0.999619	ENSG00000140398	NEIL1	nei like DNA glycosylase 1
3286	17_18972894_19972894	All_African_meta-analysis	TGP_Cell_lines	0.999612	ENSG00000262319.1
3245	17_18972894_19972894	All_African_meta-analysis	TGP_Cell_lines	0.999612	ENSG00000265185.6	SNORD3B-1
3286	17_18972894_19972894	All_African_meta-analysis	TGP_Cell_lines	0.999612	ENSG00000128487.18	SPECC1	sperm antigen with calponin homology and coiled-coil domains 1
3286	17_18972894_19972894	All_African_meta-analysis	TGP_Cell_lines	0.999611	ENSG00000262202.4
3141	15_44721609_45721609	All_African_meta-analysis	Kidney_Cortex	0.999608	ENSG00000259433
3242	15_44721609_45721609	All_African_meta-analysis	Skin_Sun_Exposed_Lower_leg	0.999608	ENSG00000171763	AFG2B	AFG2 AAA ATPase homolog B
2732	17_18972894_19972894	All_African_meta-analysis	Tube.NephQTL2	0.999608	ENSG00000108602	ALDH3A1	aldehyde dehydrogenase 3 family member A1
3286	17_18972894_19972894	All_African_meta-analysis	TGP_Cell_lines	0.999606	ENSG00000072210.19	ALDH3A2	aldehyde dehydrogenase 3 family member A2
2457	11_64644075_65644075	All_African_meta-analysis	Adipose_Subcutaneous	0.999604	ENSG00000014216	CAPN1	calpain 1
2356	15_75713980_76713980	All_African_meta-analysis	Testis	0.999601	ENSG00000259790	ANP32BP1
2732	17_18972894_19972894	All_African_meta-analysis	Tube.NephQTL2	0.999595	ENSG00000180638	SLC47A2	solute carrier family 47 member 2
2457	11_64644075_65644075	All_African_meta-analysis	Thyroid	0.999585	ENSG00000133884	DPF2	double PHD fingers 2
3564	6_160174632_161174632	All_African_meta-analysis	Esophagus_Muscularis	0.999582	ENSG00000112499	SLC22A2	solute carrier family 22 member 2
3026	6_160174632_161174632	All_African_meta-analysis	Thyroid	0.999582	ENSG00000237927
3026	6_160174632_161174632	All_African_meta-analysis	Prostate	0.999574	ENSG00000237927
2457	11_64644075_65644075	All_African_meta-analysis	Small_Intestine_Terminal_Ileum	0.999569	ENSG00000172922	RNASEH2C	ribonuclease H2 subunit C
2457	11_64644075_65644075	All_African_meta-analysis	Whole_Blood	0.999568	ENSG00000172977	KAT5	lysine acetyltransferase 5
2584	15_75713980_76713980	All_African_meta-analysis	Brain_Nucleus_accumbens_basal_ganglia	0.999564	ENSG00000274515
3382	15_45639843_46639843	All_African_meta-analysis	Skin_Sun_Exposed_Lower_leg	0.999563	ENSG00000171763	AFG2B	AFG2 AAA ATPase homolog B
1010	15_75713980_76713980	All_African_meta-analysis	Skin_Sun_Exposed_Lower_leg	0.999562	ENSG00000140497	SCAMP2	secretory carrier membrane protein 2
2457	11_64644075_65644075	All_African_meta-analysis	Stomach	0.999556	ENSG00000270775	EEF1A1P18
2455	11_64644075_65644075	All_African_meta-analysis	Brain_Putamen_basal_ganglia	0.999555	ENSG00000172803	SNX32	sorting nexin 32
2457	11_64644075_65644075	All_African_meta-analysis	Whole_Blood	0.999541	ENSG00000173442	EHBP1L1	EH domain binding protein 1 like 1
2584	15_75713980_76713980	All_African_meta-analysis	Artery_Tibial	0.999537	ENSG00000169371	SNUPN	snurportin 1
2446	11_64644075_65644075	All_African_meta-analysis	Brain_Hypothalamus	0.999537	ENSG00000255200	PGAM1P8
2438	11_64644075_65644075	All_African_meta-analysis	Artery_Aorta	0.999535	ENSG00000172500	FIBP	FGF1 intracellular binding protein
4353	6_160174632_161174632	All_African_meta-analysis	Tube.NephQTL2	0.99953	ENSG00000224477
3026	6_160174632_161174632	All_African_meta-analysis	Nerve_Tibial	0.999516	ENSG00000237927
2457	11_64644075_65644075	All_African_meta-analysis	Artery_Aorta	0.999505	ENSG00000172638	EFEMP2	EGF containing fibulin extracellular matrix protein 2
3242	15_44721609_45721609	All_African_meta-analysis	Prostate	0.999491	ENSG00000259539
2454	11_64644075_65644075	All_African_meta-analysis	Spleen	0.999476	ENSG00000172922	RNASEH2C	ribonuclease H2 subunit C
2464	15_75713980_76713980	All_African_meta-analysis	Stomach	0.999467	ENSG00000260274
2457	11_64644075_65644075	All_African_meta-analysis	Lung	0.999463	ENSG00000260233	ZNRD2-DT
3286	17_18972894_19972894	All_African_meta-analysis	TGP_Cell_lines	0.999461	ENSG00000262292.2	GRAPLDR
2457	11_64644075_65644075	All_African_meta-analysis	Adipose_Subcutaneous	0.999453	ENSG00000197136	PCNX3	pecanex 3
3242	15_44721609_45721609	All_African_meta-analysis	Muscle_Skeletal	0.999451	ENSG00000140263	SORD	sorbitol dehydrogenase
2457	11_64644075_65644075	All_African_meta-analysis	Skin_Sun_Exposed_Lower_leg	0.999449	ENSG00000214659	KRT8P26
2912	17_37234482_38234482	All_African_meta-analysis	Prostate	0.999441	ENSG00000167914	GSDMA	gasdermin A
2912	17_37234482_38234482	All_African_meta-analysis	Colon_Sigmoid	0.999432	ENSG00000264968
2278	11_64644075_65644075	All_African_meta-analysis	Brain_Spinal_cord_cervical_c-1	0.99943	ENSG00000172803	SNX32	sorting nexin 32
2453	11_64644075_65644075	All_African_meta-analysis	Brain_Frontal_Cortex_BA9	0.999427	ENSG00000172922	RNASEH2C	ribonuclease H2 subunit C
2584	15_75713980_76713980	All_African_meta-analysis	Cells_Cultured_fibroblasts	0.999425	ENSG00000173546	CSPG4	chondroitin sulfate proteoglycan 4
3382	15_45639843_46639843	All_African_meta-analysis	Adipose_Subcutaneous	0.999423	ENSG00000137767	SQOR	sulfide quinone oxidoreductase
2457	11_64644075_65644075	All_African_meta-analysis	Skin_Not_Sun_Exposed_Suprapubic	0.999414	ENSG00000168060	NAALADL1	N-acetylated alpha-linked acidic dipeptidase like 1
2457	11_64644075_65644075	All_African_meta-analysis	Brain_Cerebellum	0.999413	ENSG00000173327	MAP3K11	mitogen-activated protein kinase kinase kinase 11
2457	11_64644075_65644075	All_African_meta-analysis	Colon_Transverse	0.999409	ENSG00000173338	KCNK7	potassium two pore domain channel subfamily K member 7
2369	17_37234482_38234482	All_African_meta-analysis	Esophagus_Gastroesophageal_Junction	0.999402	ENSG00000263874	LASP1NB	LASP1 neighbor
2912	17_37234482_38234482	All_African_meta-analysis	Spleen	0.999383	ENSG00000108342	CSF3	colony stimulating factor 3
2811	17_18972894_19972894	All_African_meta-analysis	Glom.NephQTL2	0.999377	ENSG00000281856
3512	6_160174632_161174632	All_African_meta-analysis	Brain_Spinal_cord_cervical_c-1	0.999352	ENSG00000112110	MRPL18	mitochondrial ribosomal protein L18
3493	17_37234482_38234482	All_African_meta-analysis	Tube.NephQTL2	0.99935	ENSG00000214553	LRRC37A11P
3562	6_160174632_161174632	All_African_meta-analysis	Brain_Hippocampus	0.999341	ENSG00000120438	TCP1	t-complex 1
2457	11_64644075_65644075	All_African_meta-analysis	Pituitary	0.999338	ENSG00000172922	RNASEH2C	ribonuclease H2 subunit C
2811	17_18972894_19972894	All_African_meta-analysis	Glom.NephQTL2	0.99932	ENSG00000228157
2454	11_64644075_65644075	All_African_meta-analysis	Spleen	0.999314	ENSG00000214659	KRT8P26
2459	15_75713980_76713980	All_African_meta-analysis	Brain_Substantia_nigra	0.99931	ENSG00000140400	MAN2C1	mannosidase alpha class 2C member 1
2457	11_64644075_65644075	All_African_meta-analysis	Adipose_Subcutaneous	0.999306	ENSG00000213445	SIPA1	signal-induced proliferation-associated 1
2840	17_37234482_38234482	All_African_meta-analysis	Kidney_Cortex	0.999299	ENSG00000167914	GSDMA	gasdermin A
2457	11_64644075_65644075	All_African_meta-analysis	Whole_Blood	0.999296	ENSG00000172732	MUS81	MUS81 structure-specific endonuclease subunit
2457	11_64644075_65644075	All_African_meta-analysis	Pancreas	0.999296	ENSG00000214659	KRT8P26
3381	15_45639843_46639843	All_African_meta-analysis	Adrenal_Gland	0.999277	ENSG00000273972
3564	6_160174632_161174632	All_African_meta-analysis	Artery_Tibial	0.999277	ENSG00000213073	CHP1P2
3459	6_160174632_161174632	All_African_meta-analysis	Whole_Blood	0.999271	ENSG00000146457	WTAP	WT1 associated protein
2912	17_37234482_38234482	All_African_meta-analysis	Cells_Cultured_fibroblasts	0.999264	ENSG00000073605	GSDMB	gasdermin B
2457	11_64644075_65644075	All_African_meta-analysis	Stomach	0.99926	ENSG00000014138	POLA2	DNA polymerase alpha 2, accessory subunit
3459	6_160174632_161174632	All_African_meta-analysis	Skin_Sun_Exposed_Lower_leg	0.999259	ENSG00000146457	WTAP	WT1 associated protein
3564	6_160174632_161174632	All_African_meta-analysis	Thyroid	0.999251	ENSG00000213073	CHP1P2
3564	6_160174632_161174632	All_African_meta-analysis	Testis	0.999248	ENSG00000175003	SLC22A1	solute carrier family 22 member 1
2581	15_75713980_76713980	All_African_meta-analysis	Brain_Cerebellum	0.999247	ENSG00000246877	DNM1P35
3564	6_160174632_161174632	All_African_meta-analysis	Esophagus_Mucosa	0.999247	ENSG00000175003	SLC22A1	solute carrier family 22 member 1
3242	15_44721609_45721609	All_African_meta-analysis	Whole_Blood	0.999244	ENSG00000171766	GATM	glycine amidinotransferase
2457	11_64644075_65644075	All_African_meta-analysis	Artery_Tibial	0.999241	ENSG00000168061	SAC3D1	SAC3 domain containing 1
3564	6_160174632_161174632	All_African_meta-analysis	Skin_Not_Sun_Exposed_Suprapubic	0.999217	ENSG00000120437	ACAT2	acetyl-CoA acetyltransferase 2
3242	15_44721609_45721609	All_African_meta-analysis	Brain_Caudate_basal_ganglia	0.999211	ENSG00000259539
2457	11_64644075_65644075	All_African_meta-analysis	Thyroid	0.999207	ENSG00000014138	POLA2	DNA polymerase alpha 2, accessory subunit
2455	11_64644075_65644075	All_African_meta-analysis	Brain_Cerebellar_Hemisphere	0.99919	ENSG00000197847	SLC22A20P
2153	17_18972894_19972894	All_African_meta-analysis	Brain_Cerebellar_Hemisphere	0.999188	ENSG00000189343	RPS2P46
2165	17_18972894_19972894	All_African_meta-analysis	Brain_Cerebellum	0.999187	ENSG00000189343	RPS2P46
2165	17_18972894_19972894	All_African_meta-analysis	Brain_Cerebellum	0.999187	ENSG00000235979
2166	17_18972894_19972894	All_African_meta-analysis	Breast_Mammary_Tissue	0.999187	ENSG00000228157
2166	17_18972894_19972894	All_African_meta-analysis	Small_Intestine_Terminal_Ileum	0.999187	ENSG00000228157
2166	17_18972894_19972894	All_African_meta-analysis	Thyroid	0.999187	ENSG00000228157
2166	17_18972894_19972894	All_African_meta-analysis	Cells_Cultured_fibroblasts	0.999187	ENSG00000228157
2153	17_18972894_19972894	All_African_meta-analysis	Brain_Cerebellar_Hemisphere	0.999187	ENSG00000235979
2166	17_18972894_19972894	All_African_meta-analysis	Colon_Transverse	0.999187	ENSG00000228157
1736	17_18972894_19972894	All_African_meta-analysis	Testis	0.999187	ENSG00000230528	NOS2P3
1670	17_18972894_19972894	All_African_meta-analysis	Testis	0.999187	ENSG00000170298	LGALS9B	galectin 9B
2164	17_18972894_19972894	All_African_meta-analysis	Cells_EBV-transformed_lymphocytes	0.999187	ENSG00000228157
2165	17_18972894_19972894	All_African_meta-analysis	Brain_Cortex	0.999187	ENSG00000235979
1735	17_18972894_19972894	All_African_meta-analysis	Brain_Cortex	0.999187	ENSG00000230528	NOS2P3
2166	17_18972894_19972894	All_African_meta-analysis	Adipose_Visceral_Omentum	0.999187	ENSG00000228157
2166	17_18972894_19972894	All_African_meta-analysis	Adipose_Subcutaneous	0.999187	ENSG00000228157
2166	17_18972894_19972894	All_African_meta-analysis	Lung	0.999187	ENSG00000228157
2128	17_18972894_19972894	All_African_meta-analysis	Testis	0.999187	ENSG00000265185	SNORD3B-1
1995	17_18972894_19972894	All_African_meta-analysis	Nerve_Tibial	0.999187	ENSG00000279825
1995	17_18972894_19972894	All_African_meta-analysis	Lung	0.999187	ENSG00000279825
2166	17_18972894_19972894	All_African_meta-analysis	Skin_Sun_Exposed_Lower_leg	0.999187	ENSG00000072134	EPN2	epsin 2
1733	17_18972894_19972894	All_African_meta-analysis	Brain_Frontal_Cortex_BA9	0.999187	ENSG00000230528	NOS2P3
1532	17_18972894_19972894	All_African_meta-analysis	Esophagus_Mucosa	0.999187	ENSG00000214822	KRT16P3
1995	17_18972894_19972894	All_African_meta-analysis	Thyroid	0.999187	ENSG00000279825
2166	17_18972894_19972894	All_African_meta-analysis	Esophagus_Mucosa	0.999187	ENSG00000270091
2166	17_18972894_19972894	All_African_meta-analysis	Skin_Not_Sun_Exposed_Suprapubic	0.999187	ENSG00000072134	EPN2	epsin 2
2166	17_18972894_19972894	All_African_meta-analysis	Colon_Sigmoid	0.999187	ENSG00000228157
2166	17_18972894_19972894	All_African_meta-analysis	Lung	0.999187	ENSG00000072134	EPN2	epsin 2
1995	17_18972894_19972894	All_African_meta-analysis	Esophagus_Mucosa	0.999187	ENSG00000279825
1670	17_18972894_19972894	All_African_meta-analysis	Lung	0.999187	ENSG00000170298	LGALS9B	galectin 9B
2166	17_18972894_19972894	All_African_meta-analysis	Adipose_Visceral_Omentum	0.999187	ENSG00000072134	EPN2	epsin 2
1733	17_18972894_19972894	All_African_meta-analysis	Brain_Caudate_basal_ganglia	0.999187	ENSG00000230528	NOS2P3
1717	17_18972894_19972894	All_African_meta-analysis	Brain_Nucleus_accumbens_basal_ganglia	0.999187	ENSG00000230528	NOS2P3
2166	17_18972894_19972894	All_African_meta-analysis	Testis	0.999187	ENSG00000262202
2166	17_18972894_19972894	All_African_meta-analysis	Breast_Mammary_Tissue	0.999187	ENSG00000072134	EPN2	epsin 2
2166	17_18972894_19972894	All_African_meta-analysis	Testis	0.999187	ENSG00000227078	LINC02094
2166	17_18972894_19972894	All_African_meta-analysis	Testis	0.999186	ENSG00000128482	RNF112	ring finger protein 112
2166	17_18972894_19972894	All_African_meta-analysis	Artery_Tibial	0.999186	ENSG00000072134	EPN2	epsin 2
2128	17_18972894_19972894	All_African_meta-analysis	Artery_Tibial	0.999186	ENSG00000265185	SNORD3B-1
2166	17_18972894_19972894	All_African_meta-analysis	Nerve_Tibial	0.999186	ENSG00000072134	EPN2	epsin 2
2166	17_18972894_19972894	All_African_meta-analysis	Whole_Blood	0.999186	ENSG00000128482	RNF112	ring finger protein 112
2166	17_18972894_19972894	All_African_meta-analysis	Spleen	0.999186	ENSG00000262319
2166	17_18972894_19972894	All_African_meta-analysis	Adipose_Subcutaneous	0.999186	ENSG00000262319
2166	17_18972894_19972894	All_African_meta-analysis	Artery_Tibial	0.999186	ENSG00000262319
2166	17_18972894_19972894	All_African_meta-analysis	Esophagus_Gastroesophageal_Junction	0.999186	ENSG00000262319
2166	17_18972894_19972894	All_African_meta-analysis	Artery_Tibial	0.999186	ENSG00000108641	B9D1	B9 domain containing 1
2166	17_18972894_19972894	All_African_meta-analysis	Esophagus_Mucosa	0.999186	ENSG00000262319
2166	17_18972894_19972894	All_African_meta-analysis	Artery_Aorta	0.999186	ENSG00000072134	EPN2	epsin 2
2166	17_18972894_19972894	All_African_meta-analysis	Thyroid	0.999186	ENSG00000262319
2166	17_18972894_19972894	All_African_meta-analysis	Artery_Aorta	0.999186	ENSG00000262319
2137	17_18972894_19972894	All_African_meta-analysis	Brain_Anterior_cingulate_cortex_BA24	0.999186	ENSG00000261033	SPECC1-DT
2148	17_18972894_19972894	All_African_meta-analysis	Adipose_Subcutaneous	0.999186	ENSG00000262074	SNORD3B-2
2166	17_18972894_19972894	All_African_meta-analysis	Nerve_Tibial	0.999186	ENSG00000072210	ALDH3A2	aldehyde dehydrogenase 3 family member A2
2166	17_18972894_19972894	All_African_meta-analysis	Nerve_Tibial	0.999186	ENSG00000228983	SLC47A1P1
2166	17_18972894_19972894	All_African_meta-analysis	Breast_Mammary_Tissue	0.999186	ENSG00000262319
1670	17_18972894_19972894	All_African_meta-analysis	Stomach	0.999186	ENSG00000170298	LGALS9B	galectin 9B
2166	17_18972894_19972894	All_African_meta-analysis	Artery_Tibial	0.999186	ENSG00000235979
2166	17_18972894_19972894	All_African_meta-analysis	Lung	0.999186	ENSG00000072210	ALDH3A2	aldehyde dehydrogenase 3 family member A2
2166	17_18972894_19972894	All_African_meta-analysis	Adipose_Visceral_Omentum	0.999186	ENSG00000262319
2166	17_18972894_19972894	All_African_meta-analysis	Nerve_Tibial	0.999186	ENSG00000261033	SPECC1-DT
2166	17_18972894_19972894	All_African_meta-analysis	Esophagus_Muscularis	0.999186	ENSG00000235979
1670	17_18972894_19972894	All_African_meta-analysis	Colon_Transverse	0.999186	ENSG00000170298	LGALS9B	galectin 9B
2166	17_18972894_19972894	All_African_meta-analysis	Artery_Aorta	0.999186	ENSG00000083290	ULK2	unc-51 like autophagy activating kinase 2
2166	17_18972894_19972894	All_African_meta-analysis	Nerve_Tibial	0.999186	ENSG00000262319
2166	17_18972894_19972894	All_African_meta-analysis	Adipose_Subcutaneous	0.999186	ENSG00000072134	EPN2	epsin 2
2166	17_18972894_19972894	All_African_meta-analysis	Adipose_Subcutaneous	0.999186	ENSG00000270091
2164	17_18972894_19972894	All_African_meta-analysis	Cells_EBV-transformed_lymphocytes	0.999186	ENSG00000262319
1735	17_18972894_19972894	All_African_meta-analysis	Brain_Cerebellum	0.999186	ENSG00000230528	NOS2P3
2165	17_18972894_19972894	All_African_meta-analysis	Brain_Cortex	0.999186	ENSG00000261033	SPECC1-DT
2166	17_18972894_19972894	All_African_meta-analysis	Skin_Sun_Exposed_Lower_leg	0.999186	ENSG00000262319
1980	17_18972894_19972894	All_African_meta-analysis	Adipose_Subcutaneous	0.999186	ENSG00000154898	CCDC144CP
2166	17_18972894_19972894	All_African_meta-analysis	Nerve_Tibial	0.999186	ENSG00000128487	SPECC1	sperm antigen with calponin homology and coiled-coil domains 1
1995	17_18972894_19972894	All_African_meta-analysis	Adipose_Subcutaneous	0.999186	ENSG00000279825
1670	17_18972894_19972894	All_African_meta-analysis	Whole_Blood	0.999186	ENSG00000170298	LGALS9B	galectin 9B
2166	17_18972894_19972894	All_African_meta-analysis	Artery_Tibial	0.999186	ENSG00000083290	ULK2	unc-51 like autophagy activating kinase 2
2166	17_18972894_19972894	All_African_meta-analysis	Skin_Not_Sun_Exposed_Suprapubic	0.999186	ENSG00000128482	RNF112	ring finger protein 112
2166	17_18972894_19972894	All_African_meta-analysis	Artery_Tibial	0.999186	ENSG00000108599	AKAP10	A-kinase anchoring protein 10
2166	17_18972894_19972894	All_African_meta-analysis	Artery_Aorta	0.999186	ENSG00000261033	SPECC1-DT
2163	17_18972894_19972894	All_African_meta-analysis	Prostate	0.999185	ENSG00000262319
2166	17_18972894_19972894	All_African_meta-analysis	Skin_Sun_Exposed_Lower_leg	0.999185	ENSG00000083290	ULK2	unc-51 like autophagy activating kinase 2
2166	17_18972894_19972894	All_African_meta-analysis	Esophagus_Muscularis	0.999185	ENSG00000128487	SPECC1	sperm antigen with calponin homology and coiled-coil domains 1
2166	17_18972894_19972894	All_African_meta-analysis	Small_Intestine_Terminal_Ileum	0.999185	ENSG00000262319
1723	17_18972894_19972894	All_African_meta-analysis	Brain_Hippocampus	0.999185	ENSG00000230528	NOS2P3
2166	17_18972894_19972894	All_African_meta-analysis	Esophagus_Gastroesophageal_Junction	0.999185	ENSG00000228157
2166	17_18972894_19972894	All_African_meta-analysis	Esophagus_Muscularis	0.999185	ENSG00000262319
2166	17_18972894_19972894	All_African_meta-analysis	Esophagus_Muscularis	0.999185	ENSG00000270091
2166	17_18972894_19972894	All_African_meta-analysis	Cells_Cultured_fibroblasts	0.999185	ENSG00000083290	ULK2	unc-51 like autophagy activating kinase 2
1785	17_18972894_19972894	All_African_meta-analysis	Thyroid	0.999185	ENSG00000189423	USP32P3
2166	17_18972894_19972894	All_African_meta-analysis	Whole_Blood	0.999185	ENSG00000108599	AKAP10	A-kinase anchoring protein 10
2166	17_18972894_19972894	All_African_meta-analysis	Nerve_Tibial	0.999185	ENSG00000108599	AKAP10	A-kinase anchoring protein 10
2166	17_18972894_19972894	All_African_meta-analysis	Testis	0.999185	ENSG00000261033	SPECC1-DT
2166	17_18972894_19972894	All_African_meta-analysis	Muscle_Skeletal	0.999185	ENSG00000083290	ULK2	unc-51 like autophagy activating kinase 2
2166	17_18972894_19972894	All_African_meta-analysis	Skin_Sun_Exposed_Lower_leg	0.999185	ENSG00000180638	SLC47A2	solute carrier family 47 member 2
1785	17_18972894_19972894	All_African_meta-analysis	Adipose_Subcutaneous	0.999185	ENSG00000189423	USP32P3
2166	17_18972894_19972894	All_African_meta-analysis	Skin_Sun_Exposed_Lower_leg	0.999185	ENSG00000270091
2166	17_18972894_19972894	All_African_meta-analysis	Adipose_Subcutaneous	0.999185	ENSG00000261033	SPECC1-DT
1980	17_18972894_19972894	All_African_meta-analysis	Thyroid	0.999185	ENSG00000154898	CCDC144CP
2166	17_18972894_19972894	All_African_meta-analysis	Artery_Tibial	0.999185	ENSG00000261033	SPECC1-DT
1980	17_18972894_19972894	All_African_meta-analysis	Artery_Aorta	0.999185	ENSG00000154898	CCDC144CP
1980	17_18972894_19972894	All_African_meta-analysis	Esophagus_Muscularis	0.999185	ENSG00000154898	CCDC144CP
1785	17_18972894_19972894	All_African_meta-analysis	Whole_Blood	0.999185	ENSG00000189423	USP32P3
2166	17_18972894_19972894	All_African_meta-analysis	Adipose_Subcutaneous	0.999185	ENSG00000128487	SPECC1	sperm antigen with calponin homology and coiled-coil domains 1
1785	17_18972894_19972894	All_African_meta-analysis	Esophagus_Muscularis	0.999185	ENSG00000189423	USP32P3
2165	17_18972894_19972894	All_African_meta-analysis	Brain_Cerebellum	0.999185	ENSG00000270091
1785	17_18972894_19972894	All_African_meta-analysis	Nerve_Tibial	0.999185	ENSG00000189423	USP32P3
1785	17_18972894_19972894	All_African_meta-analysis	Breast_Mammary_Tissue	0.999185	ENSG00000189423	USP32P3
1980	17_18972894_19972894	All_African_meta-analysis	Artery_Tibial	0.999185	ENSG00000154898	CCDC144CP
1980	17_18972894_19972894	All_African_meta-analysis	Adipose_Visceral_Omentum	0.999185	ENSG00000154898	CCDC144CP
1785	17_18972894_19972894	All_African_meta-analysis	Adipose_Visceral_Omentum	0.999185	ENSG00000189423	USP32P3
1980	17_18972894_19972894	All_African_meta-analysis	Nerve_Tibial	0.999185	ENSG00000154898	CCDC144CP
2402	17_58956589_59956589	All_African_meta-analysis	Nerve_Tibial	0.999184	ENSG00000136492	BRIP1	BRCA1 interacting helicase 1
1980	17_18972894_19972894	All_African_meta-analysis	Breast_Mammary_Tissue	0.999184	ENSG00000154898	CCDC144CP
2165	17_18972894_19972894	All_African_meta-analysis	Brain_Cerebellum	0.999184	ENSG00000227078	LINC02094
2166	17_18972894_19972894	All_African_meta-analysis	Muscle_Skeletal	0.999184	ENSG00000072134	EPN2	epsin 2
1995	17_18972894_19972894	All_African_meta-analysis	Testis	0.999184	ENSG00000279825
1995	17_18972894_19972894	All_African_meta-analysis	Esophagus_Muscularis	0.999184	ENSG00000279825
2166	17_18972894_19972894	All_African_meta-analysis	Lung	0.999184	ENSG00000270091
2166	17_18972894_19972894	All_African_meta-analysis	Artery_Tibial	0.999184	ENSG00000128487	SPECC1	sperm antigen with calponin homology and coiled-coil domains 1
2166	17_18972894_19972894	All_African_meta-analysis	Skin_Not_Sun_Exposed_Suprapubic	0.999184	ENSG00000083290	ULK2	unc-51 like autophagy activating kinase 2
1980	17_18972894_19972894	All_African_meta-analysis	Skin_Sun_Exposed_Lower_leg	0.999184	ENSG00000154898	CCDC144CP
2128	17_18972894_19972894	All_African_meta-analysis	Adipose_Visceral_Omentum	0.999184	ENSG00000265185	SNORD3B-1
2166	17_18972894_19972894	All_African_meta-analysis	Colon_Transverse	0.999184	ENSG00000262319
2166	17_18972894_19972894	All_African_meta-analysis	Colon_Sigmoid	0.999184	ENSG00000262319
2166	17_18972894_19972894	All_African_meta-analysis	Adrenal_Gland	0.999184	ENSG00000228157
2166	17_18972894_19972894	All_African_meta-analysis	Esophagus_Muscularis	0.999184	ENSG00000083290	ULK2	unc-51 like autophagy activating kinase 2
2402	17_58956589_59956589	All_African_meta-analysis	Adrenal_Gland	0.999183	ENSG00000121075	TBX4	T-box transcription factor 4
2153	17_18972894_19972894	All_African_meta-analysis	Brain_Cerebellar_Hemisphere	0.999183	ENSG00000227078	LINC02094
2165	17_18972894_19972894	All_African_meta-analysis	Brain_Cortex	0.999183	ENSG00000270091
2166	17_18972894_19972894	All_African_meta-analysis	Thyroid	0.999183	ENSG00000261033	SPECC1-DT
1670	17_18972894_19972894	All_African_meta-analysis	Esophagus_Mucosa	0.999183	ENSG00000170298	LGALS9B	galectin 9B
2166	17_18972894_19972894	All_African_meta-analysis	Esophagus_Muscularis	0.999183	ENSG00000261033	SPECC1-DT
2166	17_18972894_19972894	All_African_meta-analysis	Skin_Sun_Exposed_Lower_leg	0.999182	ENSG00000108602	ALDH3A1	aldehyde dehydrogenase 3 family member A1
2166	17_18972894_19972894	All_African_meta-analysis	Testis	0.999182	ENSG00000072210	ALDH3A2	aldehyde dehydrogenase 3 family member A2
2166	17_18972894_19972894	All_African_meta-analysis	Adipose_Subcutaneous	0.999182	ENSG00000083290	ULK2	unc-51 like autophagy activating kinase 2
2166	17_18972894_19972894	All_African_meta-analysis	Adipose_Subcutaneous	0.999181	ENSG00000108599	AKAP10	A-kinase anchoring protein 10
2910	17_37234482_38234482	All_African_meta-analysis	Brain_Cerebellum	0.999181	ENSG00000073605	GSDMB	gasdermin B
1785	17_18972894_19972894	All_African_meta-analysis	Artery_Aorta	0.99918	ENSG00000189423	USP32P3
1670	17_18972894_19972894	All_African_meta-analysis	Skin_Sun_Exposed_Lower_leg	0.99918	ENSG00000170298	LGALS9B	galectin 9B
2166	17_18972894_19972894	All_African_meta-analysis	Whole_Blood	0.99918	ENSG00000262319
1785	17_18972894_19972894	All_African_meta-analysis	Testis	0.99918	ENSG00000189423	USP32P3
2166	17_18972894_19972894	All_African_meta-analysis	Lung	0.999179	ENSG00000262319
1980	17_18972894_19972894	All_African_meta-analysis	Heart_Left_Ventricle	0.999179	ENSG00000154898	CCDC144CP
2402	17_58956589_59956589	All_African_meta-analysis	Esophagus_Mucosa	0.999179	ENSG00000136492	BRIP1	BRCA1 interacting helicase 1
2166	17_18972894_19972894	All_African_meta-analysis	Skin_Not_Sun_Exposed_Suprapubic	0.999179	ENSG00000108602	ALDH3A1	aldehyde dehydrogenase 3 family member A1
2166	17_18972894_19972894	All_African_meta-analysis	Lung	0.999177	ENSG00000108599	AKAP10	A-kinase anchoring protein 10
2166	17_18972894_19972894	All_African_meta-analysis	Testis	0.999176	ENSG00000228983	SLC47A1P1
2166	17_18972894_19972894	All_African_meta-analysis	Adipose_Visceral_Omentum	0.999175	ENSG00000083290	ULK2	unc-51 like autophagy activating kinase 2
2402	17_58956589_59956589	All_African_meta-analysis	Adipose_Visceral_Omentum	0.999175	ENSG00000136492	BRIP1	BRCA1 interacting helicase 1
1995	17_18972894_19972894	All_African_meta-analysis	Spleen	0.999175	ENSG00000279825
2166	17_18972894_19972894	All_African_meta-analysis	Spleen	0.999175	ENSG00000072210	ALDH3A2	aldehyde dehydrogenase 3 family member A2
2166	17_18972894_19972894	All_African_meta-analysis	Skin_Sun_Exposed_Lower_leg	0.999175	ENSG00000128487	SPECC1	sperm antigen with calponin homology and coiled-coil domains 1
2402	17_58956589_59956589	All_African_meta-analysis	Skin_Not_Sun_Exposed_Suprapubic	0.999173	ENSG00000121075	TBX4	T-box transcription factor 4
2166	17_18972894_19972894	All_African_meta-analysis	Nerve_Tibial	0.99917	ENSG00000235979
2166	17_18972894_19972894	All_African_meta-analysis	Nerve_Tibial	0.99917	ENSG00000231625	SLC47A1P2
1670	17_18972894_19972894	All_African_meta-analysis	Skin_Not_Sun_Exposed_Suprapubic	0.99917	ENSG00000170298	LGALS9B	galectin 9B
2166	17_18972894_19972894	All_African_meta-analysis	Esophagus_Muscularis	0.999169	ENSG00000072210	ALDH3A2	aldehyde dehydrogenase 3 family member A2
2164	17_18972894_19972894	All_African_meta-analysis	Cells_EBV-transformed_lymphocytes	0.999169	ENSG00000072210	ALDH3A2	aldehyde dehydrogenase 3 family member A2
2166	17_18972894_19972894	All_African_meta-analysis	Testis	0.999169	ENSG00000083290	ULK2	unc-51 like autophagy activating kinase 2
3242	15_44721609_45721609	All_African_meta-analysis	Nerve_Tibial	0.999168	ENSG00000140279	DUOX2	dual oxidase 2
2166	17_18972894_19972894	All_African_meta-analysis	Artery_Aorta	0.999168	ENSG00000108641	B9D1	B9 domain containing 1
2166	17_18972894_19972894	All_African_meta-analysis	Whole_Blood	0.999168	ENSG00000072210	ALDH3A2	aldehyde dehydrogenase 3 family member A2
1785	17_18972894_19972894	All_African_meta-analysis	Heart_Left_Ventricle	0.999167	ENSG00000189423	USP32P3
2166	17_18972894_19972894	All_African_meta-analysis	Skin_Sun_Exposed_Lower_leg	0.999166	ENSG00000128482	RNF112	ring finger protein 112
2137	17_18972894_19972894	All_African_meta-analysis	Brain_Nucleus_accumbens_basal_ganglia	0.999165	ENSG00000142494	SLC47A1	solute carrier family 47 member 1
2128	17_18972894_19972894	All_African_meta-analysis	Artery_Aorta	0.999165	ENSG00000265185	SNORD3B-1
2166	17_18972894_19972894	All_African_meta-analysis	Thyroid	0.999164	ENSG00000072210	ALDH3A2	aldehyde dehydrogenase 3 family member A2
2166	17_18972894_19972894	All_African_meta-analysis	Artery_Coronary	0.999163	ENSG00000072134	EPN2	epsin 2
2166	17_18972894_19972894	All_African_meta-analysis	Esophagus_Muscularis	0.999163	ENSG00000072134	EPN2	epsin 2
2457	11_64644075_65644075	All_African_meta-analysis	Colon_Transverse	0.999163	ENSG00000260233	ZNRD2-DT
2402	17_58956589_59956589	All_African_meta-analysis	Skin_Sun_Exposed_Lower_leg	0.999162	ENSG00000136492	BRIP1	BRCA1 interacting helicase 1
2166	17_18972894_19972894	All_African_meta-analysis	Testis	0.999161	ENSG00000231625	SLC47A1P2
2166	17_18972894_19972894	All_African_meta-analysis	Thyroid	0.999159	ENSG00000270091
3382	15_45639843_46639843	All_African_meta-analysis	Heart_Left_Ventricle	0.999158	ENSG00000137767	SQOR	sulfide quinone oxidoreductase
2402	17_58956589_59956589	All_African_meta-analysis	Adipose_Subcutaneous	0.999157	ENSG00000136492	BRIP1	BRCA1 interacting helicase 1
1982	17_58956589_59956589	All_African_meta-analysis	Adipose_Subcutaneous	0.999153	ENSG00000108510	MED13	mediator complex subunit 13
2166	17_18972894_19972894	All_African_meta-analysis	Cells_Cultured_fibroblasts	0.99915	ENSG00000270091
2166	17_18972894_19972894	All_African_meta-analysis	Heart_Atrial_Appendage	0.999149	ENSG00000083290	ULK2	unc-51 like autophagy activating kinase 2
2163	17_18972894_19972894	All_African_meta-analysis	Brain_Caudate_basal_ganglia	0.999149	ENSG00000262681
2166	17_18972894_19972894	All_African_meta-analysis	Spleen	0.999147	ENSG00000108599	AKAP10	A-kinase anchoring protein 10
2166	17_18972894_19972894	All_African_meta-analysis	Spleen	0.999147	ENSG00000228157
2166	17_18972894_19972894	All_African_meta-analysis	Esophagus_Gastroesophageal_Junction	0.999145	ENSG00000235979
2166	17_18972894_19972894	All_African_meta-analysis	Adipose_Visceral_Omentum	0.999144	ENSG00000180638	SLC47A2	solute carrier family 47 member 2
3565	17_37234482_38234482	All_African_meta-analysis	Tube.NephQTL2	0.999144	ENSG00000264968
2456	11_64644075_65644075	All_African_meta-analysis	Minor_Salivary_Gland	0.999143	ENSG00000172803	SNX32	sorting nexin 32
1576	17_18972894_19972894	All_African_meta-analysis	Esophagus_Mucosa	0.999141	ENSG00000230088	KRT16P5
2457	11_64644075_65644075	All_African_meta-analysis	Whole_Blood	0.999138	ENSG00000172757	CFL1	cofilin 1
2166	17_18972894_19972894	All_African_meta-analysis	Artery_Aorta	0.999132	ENSG00000072210	ALDH3A2	aldehyde dehydrogenase 3 family member A2
2912	17_37234482_38234482	All_African_meta-analysis	Pancreas	0.999132	ENSG00000280177
2457	11_64644075_65644075	All_African_meta-analysis	Skin_Not_Sun_Exposed_Suprapubic	0.999131	ENSG00000168056	LTBP3	latent transforming growth factor beta binding protein 3
2163	17_18972894_19972894	All_African_meta-analysis	Brain_Frontal_Cortex_BA9	0.999131	ENSG00000235979
2449	11_64644075_65644075	All_African_meta-analysis	Brain_Substantia_nigra	0.999128	ENSG00000172803	SNX32	sorting nexin 32
2166	17_18972894_19972894	All_African_meta-analysis	Heart_Left_Ventricle	0.999126	ENSG00000270091
2457	11_64644075_65644075	All_African_meta-analysis	Esophagus_Gastroesophageal_Junction	0.999121	ENSG00000260233	ZNRD2-DT
2128	17_18972894_19972894	All_African_meta-analysis	Breast_Mammary_Tissue	0.999119	ENSG00000265185	SNORD3B-1
3240	15_44721609_45721609	All_African_meta-analysis	Testis	0.999119	ENSG00000166920	C15orf48	chromosome 15 open reading frame 48
2882	17_58956589_59956589	All_African_meta-analysis	Glom.NephQTL2	0.999119	ENSG00000267280	TBX2-AS1	TBX2 antisense RNA 1
1950	17_18972894_19972894	All_African_meta-analysis	Brain_Putamen_basal_ganglia	0.999117	ENSG00000154898	CCDC144CP
2166	17_18972894_19972894	All_African_meta-analysis	Adipose_Visceral_Omentum	0.999116	ENSG00000261033	SPECC1-DT
2402	17_58956589_59956589	All_African_meta-analysis	Nerve_Tibial	0.999115	ENSG00000121068	TBX2	T-box transcription factor 2
2166	17_18972894_19972894	All_African_meta-analysis	Muscle_Skeletal	0.999115	ENSG00000108599	AKAP10	A-kinase anchoring protein 10
2402	17_58956589_59956589	All_African_meta-analysis	Thyroid	0.999114	ENSG00000121068	TBX2	T-box transcription factor 2
2402	17_58956589_59956589	All_African_meta-analysis	Adipose_Visceral_Omentum	0.999114	ENSG00000121068	TBX2	T-box transcription factor 2
2402	17_58956589_59956589	All_African_meta-analysis	Adipose_Subcutaneous	0.999113	ENSG00000267280	TBX2-AS1	TBX2 antisense RNA 1
3238	15_44721609_45721609	All_African_meta-analysis	Liver	0.999112	ENSG00000259479	SORD2P
2402	17_58956589_59956589	All_African_meta-analysis	Cells_Cultured_fibroblasts	0.999111	ENSG00000267280	TBX2-AS1	TBX2 antisense RNA 1
2402	17_58956589_59956589	All_African_meta-analysis	Muscle_Skeletal	0.99911	ENSG00000267280	TBX2-AS1	TBX2 antisense RNA 1
2402	17_58956589_59956589	All_African_meta-analysis	Thyroid	0.999109	ENSG00000267280	TBX2-AS1	TBX2 antisense RNA 1
2402	17_58956589_59956589	All_African_meta-analysis	Nerve_Tibial	0.999109	ENSG00000267280	TBX2-AS1	TBX2 antisense RNA 1
2402	17_58956589_59956589	All_African_meta-analysis	Breast_Mammary_Tissue	0.999107	ENSG00000267280	TBX2-AS1	TBX2 antisense RNA 1
2166	17_18972894_19972894	All_African_meta-analysis	Esophagus_Gastroesophageal_Junction	0.999106	ENSG00000228983	SLC47A1P1
2402	17_58956589_59956589	All_African_meta-analysis	Esophagus_Mucosa	0.999105	ENSG00000267280	TBX2-AS1	TBX2 antisense RNA 1
2402	17_58956589_59956589	All_African_meta-analysis	Artery_Aorta	0.999104	ENSG00000267280	TBX2-AS1	TBX2 antisense RNA 1
2163	17_18972894_19972894	All_African_meta-analysis	Pituitary	0.999099	ENSG00000128487	SPECC1	sperm antigen with calponin homology and coiled-coil domains 1
2457	11_64644075_65644075	All_African_meta-analysis	Adipose_Subcutaneous	0.999097	ENSG00000014138	POLA2	DNA polymerase alpha 2, accessory subunit
2402	17_58956589_59956589	All_African_meta-analysis	Adipose_Visceral_Omentum	0.999097	ENSG00000267280	TBX2-AS1	TBX2 antisense RNA 1
2163	17_18972894_19972894	All_African_meta-analysis	Brain_Caudate_basal_ganglia	0.999097	ENSG00000228331	RPL17P43
2402	17_58956589_59956589	All_African_meta-analysis	Adipose_Subcutaneous	0.999092	ENSG00000121068	TBX2	T-box transcription factor 2
2783	17_58956589_59956589	All_African_meta-analysis	Tube.NephQTL2	0.99909	ENSG00000267280	TBX2-AS1	TBX2 antisense RNA 1
2402	17_58956589_59956589	All_African_meta-analysis	Esophagus_Muscularis	0.99909	ENSG00000267280	TBX2-AS1	TBX2 antisense RNA 1
2402	17_58956589_59956589	All_African_meta-analysis	Lung	0.99909	ENSG00000267280	TBX2-AS1	TBX2 antisense RNA 1
2459	15_75713980_76713980	All_African_meta-analysis	Brain_Anterior_cingulate_cortex_BA24	0.999089	ENSG00000140400	MAN2C1	mannosidase alpha class 2C member 1
2166	17_18972894_19972894	All_African_meta-analysis	Artery_Tibial	0.999087	ENSG00000227078	LINC02094
2402	17_58956589_59956589	All_African_meta-analysis	Esophagus_Gastroesophageal_Junction	0.999087	ENSG00000267280	TBX2-AS1	TBX2 antisense RNA 1
2402	17_58956589_59956589	All_African_meta-analysis	Testis	0.999082	ENSG00000267280	TBX2-AS1	TBX2 antisense RNA 1
2402	17_58956589_59956589	All_African_meta-analysis	Esophagus_Muscularis	0.999082	ENSG00000136492	BRIP1	BRCA1 interacting helicase 1
2402	17_58956589_59956589	All_African_meta-analysis	Colon_Transverse	0.99908	ENSG00000267280	TBX2-AS1	TBX2 antisense RNA 1
1980	17_18972894_19972894	All_African_meta-analysis	Stomach	0.999079	ENSG00000154898	CCDC144CP
2128	17_18972894_19972894	All_African_meta-analysis	Skin_Sun_Exposed_Lower_leg	0.999079	ENSG00000265185	SNORD3B-1
2402	17_58956589_59956589	All_African_meta-analysis	Artery_Tibial	0.999077	ENSG00000267280	TBX2-AS1	TBX2 antisense RNA 1
2402	17_58956589_59956589	All_African_meta-analysis	Testis	0.999073	ENSG00000121068	TBX2	T-box transcription factor 2
2457	11_64644075_65644075	All_African_meta-analysis	Artery_Aorta	0.999069	ENSG00000110025	SNX15	sorting nexin 15
2166	17_18972894_19972894	All_African_meta-analysis	Artery_Tibial	0.999066	ENSG00000270091
2166	17_18972894_19972894	All_African_meta-analysis	Esophagus_Muscularis	0.999065	ENSG00000231625	SLC47A1P2
2401	17_58956589_59956589	All_African_meta-analysis	Brain_Cortex	0.999061	ENSG00000267280	TBX2-AS1	TBX2 antisense RNA 1
1736	17_18972894_19972894	All_African_meta-analysis	Spleen	0.999059	ENSG00000230528	NOS2P3
1605	17_18972894_19972894	All_African_meta-analysis	Esophagus_Mucosa	0.999057	ENSG00000229586	TNPO1P3
3390	11_64644075_65644075	All_African_meta-analysis	TGP_Cell_lines	0.99905	ENSG00000172818.10	OVOL1	ovo like transcriptional repressor 1
2457	11_64644075_65644075	All_African_meta-analysis	Adipose_Visceral_Omentum	0.999042	ENSG00000133884	DPF2	double PHD fingers 2
1995	17_18972894_19972894	All_African_meta-analysis	Adrenal_Gland	0.999035	ENSG00000279825
2457	11_64644075_65644075	All_African_meta-analysis	Adipose_Subcutaneous	0.999033	ENSG00000168060	NAALADL1	N-acetylated alpha-linked acidic dipeptidase like 1
3236	15_44721609_45721609	All_African_meta-analysis	Pituitary	0.999031	ENSG00000185880	TRIM69	tripartite motif containing 69
2903	17_37234482_38234482	All_African_meta-analysis	Brain_Nucleus_accumbens_basal_ganglia	0.999031	ENSG00000008838	MED24	mediator complex subunit 24
2166	17_18972894_19972894	All_African_meta-analysis	Adrenal_Gland	0.999029	ENSG00000262319
3242	15_44721609_45721609	All_African_meta-analysis	Brain_Caudate_basal_ganglia	0.99901	ENSG00000185880	TRIM69	tripartite motif containing 69
2166	17_18972894_19972894	All_African_meta-analysis	Esophagus_Mucosa	0.999007	ENSG00000128482	RNF112	ring finger protein 112
2166	17_18972894_19972894	All_African_meta-analysis	Testis	0.999004	ENSG00000262319
3382	15_45639843_46639843	All_African_meta-analysis	Esophagus_Mucosa	0.999004	ENSG00000137767	SQOR	sulfide quinone oxidoreductase
2457	11_64644075_65644075	All_African_meta-analysis	Whole_Blood	0.999003	ENSG00000173727	FAUP4
2164	17_18972894_19972894	All_African_meta-analysis	Ovary	0.998994	ENSG00000262319
2401	17_58956589_59956589	All_African_meta-analysis	Spleen	0.998994	ENSG00000267280	TBX2-AS1	TBX2 antisense RNA 1
2457	11_64644075_65644075	All_African_meta-analysis	Nerve_Tibial	0.998973	ENSG00000110047	EHD1	EH domain containing 1
1783	17_18972894_19972894	All_African_meta-analysis	Testis	0.998962	ENSG00000237911	SRP68P3
2166	17_18972894_19972894	All_African_meta-analysis	Thyroid	0.998958	ENSG00000072134	EPN2	epsin 2
2402	17_58956589_59956589	All_African_meta-analysis	Heart_Left_Ventricle	0.998955	ENSG00000267280	TBX2-AS1	TBX2 antisense RNA 1
2166	17_18972894_19972894	All_African_meta-analysis	Breast_Mammary_Tissue	0.998951	ENSG00000270091
2166	17_18972894_19972894	All_African_meta-analysis	Esophagus_Mucosa	0.998949	ENSG00000083290	ULK2	unc-51 like autophagy activating kinase 2
2069	11_64644075_65644075	All_African_meta-analysis	Esophagus_Mucosa	0.998943	ENSG00000175376	EIF1AD	eukaryotic translation initiation factor 1A domain containing
3913	9_97251621_98251621	All_African_meta-analysis	TGP_Cell_lines	0.99894	ENSG00000148110.16	MFSD14B	major facilitator superfamily domain containing 14B
2721	9_97251621_98251621	All_African_meta-analysis	Skin_Sun_Exposed_Lower_leg	0.99894	ENSG00000148110	MFSD14B	major facilitator superfamily domain containing 14B
2721	9_97251621_98251621	All_African_meta-analysis	Cells_Cultured_fibroblasts	0.99894	ENSG00000148110	MFSD14B	major facilitator superfamily domain containing 14B
2631	9_97251621_98251621	All_African_meta-analysis	Esophagus_Muscularis	0.998939	ENSG00000232063
2631	9_97251621_98251621	All_African_meta-analysis	Whole_Blood	0.998939	ENSG00000232063
2631	9_97251621_98251621	All_African_meta-analysis	Colon_Sigmoid	0.998939	ENSG00000232063
2631	9_97251621_98251621	All_African_meta-analysis	Cells_Cultured_fibroblasts	0.998939	ENSG00000232063
3566	9_97251621_98251621	All_African_meta-analysis	Tube.NephQTL2	0.998938	ENSG00000231806	PCAT7
2631	9_97251621_98251621	All_African_meta-analysis	Artery_Aorta	0.998938	ENSG00000232063
2631	9_97251621_98251621	All_African_meta-analysis	Lung	0.998938	ENSG00000232063
2631	9_97251621_98251621	All_African_meta-analysis	Adipose_Visceral_Omentum	0.998937	ENSG00000232063
2631	9_97251621_98251621	All_African_meta-analysis	Esophagus_Gastroesophageal_Junction	0.998937	ENSG00000232063
2631	9_97251621_98251621	All_African_meta-analysis	Adipose_Subcutaneous	0.998936	ENSG00000232063
3760	9_97251621_98251621	All_African_meta-analysis	TGP_Cell_lines	0.998936	ENSG00000232063.2
2631	9_97251621_98251621	All_African_meta-analysis	Artery_Tibial	0.998936	ENSG00000232063
2721	9_97251621_98251621	All_African_meta-analysis	Muscle_Skeletal	0.998935	ENSG00000148110	MFSD14B	major facilitator superfamily domain containing 14B
2721	9_97251621_98251621	All_African_meta-analysis	Whole_Blood	0.998935	ENSG00000148110	MFSD14B	major facilitator superfamily domain containing 14B
2630	9_97251621_98251621	All_African_meta-analysis	Artery_Coronary	0.998934	ENSG00000232063
2631	9_97251621_98251621	All_African_meta-analysis	Nerve_Tibial	0.998934	ENSG00000232063
2630	9_97251621_98251621	All_African_meta-analysis	Adrenal_Gland	0.998933	ENSG00000232063
2631	9_97251621_98251621	All_African_meta-analysis	Heart_Atrial_Appendage	0.998932	ENSG00000232063
3019	9_97251621_98251621	All_African_meta-analysis	Pituitary	0.998932	ENSG00000165140	FBP1	fructose-bisphosphatase 1
2627	9_97251621_98251621	All_African_meta-analysis	Nerve_Tibial	0.998932	ENSG00000130950	NUTM2F	NUT family member 2F
2166	17_18972894_19972894	All_African_meta-analysis	Esophagus_Gastroesophageal_Junction	0.998931	ENSG00000270091
2631	9_97251621_98251621	All_African_meta-analysis	Breast_Mammary_Tissue	0.998926	ENSG00000232063
2721	9_97251621_98251621	All_African_meta-analysis	Skin_Not_Sun_Exposed_Suprapubic	0.998924	ENSG00000148110	MFSD14B	major facilitator superfamily domain containing 14B
2402	17_58956589_59956589	All_African_meta-analysis	Muscle_Skeletal	0.998923	ENSG00000121068	TBX2	T-box transcription factor 2
2631	9_97251621_98251621	All_African_meta-analysis	Thyroid	0.99892	ENSG00000232063
1995	17_18972894_19972894	All_African_meta-analysis	Artery_Aorta	0.99892	ENSG00000279825
2631	9_97251621_98251621	All_African_meta-analysis	Prostate	0.998917	ENSG00000232063
4368	9_97251621_98251621	All_African_meta-analysis	TGP_Cell_lines	0.998914	ENSG00000148120.18	AOPEP	aminopeptidase O (putative)
3785	15_45639843_46639843	All_African_meta-analysis	Tube.NephQTL2	0.998914	ENSG00000259520	SLC28A2-AS1
3035	9_97251621_98251621	All_African_meta-analysis	Pancreas	0.998913	ENSG00000130957	FBP2	fructose-bisphosphatase 2
3035	9_97251621_98251621	All_African_meta-analysis	Muscle_Skeletal	0.998913	ENSG00000130957	FBP2	fructose-bisphosphatase 2
3566	9_97251621_98251621	All_African_meta-analysis	Tube.NephQTL2	0.998908	ENSG00000165140	FBP1	fructose-bisphosphatase 1
6116	11_4707604_5707604	All_African_meta-analysis	TGP_Cell_lines	0.998907	ENSG00000132256.20	TRIM5	tripartite motif containing 5
2927	9_97251621_98251621	All_African_meta-analysis	Spleen	0.998906	ENSG00000185920	PTCH1	patched 1
2904	17_37234482_38234482	All_African_meta-analysis	Small_Intestine_Terminal_Ileum	0.998898	ENSG00000108306	FBXL20	F-box and leucine rich repeat protein 20
2721	9_97251621_98251621	All_African_meta-analysis	Colon_Sigmoid	0.998897	ENSG00000148110	MFSD14B	major facilitator superfamily domain containing 14B
2721	9_97251621_98251621	All_African_meta-analysis	Artery_Tibial	0.998897	ENSG00000148110	MFSD14B	major facilitator superfamily domain containing 14B
2402	17_58956589_59956589	All_African_meta-analysis	Colon_Sigmoid	0.998893	ENSG00000267280	TBX2-AS1	TBX2 antisense RNA 1
3035	9_97251621_98251621	All_African_meta-analysis	Heart_Left_Ventricle	0.998893	ENSG00000148120	AOPEP	aminopeptidase O (putative)
2549	9_97251621_98251621	All_African_meta-analysis	Brain_Cerebellum	0.998892	ENSG00000175787	ZNF169	zinc finger protein 169
2912	17_37234482_38234482	All_African_meta-analysis	Artery_Tibial	0.99889	ENSG00000073605	GSDMB	gasdermin B
2166	17_18972894_19972894	All_African_meta-analysis	Colon_Sigmoid	0.998889	ENSG00000083290	ULK2	unc-51 like autophagy activating kinase 2
2584	15_75713980_76713980	All_African_meta-analysis	Adipose_Subcutaneous	0.998887	ENSG00000196274
3035	9_97251621_98251621	All_African_meta-analysis	Skin_Sun_Exposed_Lower_leg	0.998882	ENSG00000148120	AOPEP	aminopeptidase O (putative)
2903	17_37234482_38234482	All_African_meta-analysis	Brain_Nucleus_accumbens_basal_ganglia	0.998881	ENSG00000161395	PGAP3	post-GPI attachment to proteins phospholipase 3
2166	17_18972894_19972894	All_African_meta-analysis	Adipose_Subcutaneous	0.99888	ENSG00000228983	SLC47A1P1
2927	9_97251621_98251621	All_African_meta-analysis	Cells_Cultured_fibroblasts	0.998879	ENSG00000185920	PTCH1	patched 1
2631	9_97251621_98251621	All_African_meta-analysis	Heart_Left_Ventricle	0.998878	ENSG00000232063
2721	9_97251621_98251621	All_African_meta-analysis	Colon_Transverse	0.998876	ENSG00000148110	MFSD14B	major facilitator superfamily domain containing 14B
2164	17_18972894_19972894	All_African_meta-analysis	Ovary	0.998876	ENSG00000128482	RNF112	ring finger protein 112
3382	15_45639843_46639843	All_African_meta-analysis	Lung	0.998872	ENSG00000179362	HMGN2P46
1250	15_75713980_76713980	All_African_meta-analysis	Adipose_Subcutaneous	0.998869	ENSG00000178718	RPP25	ribonuclease P and MRP subunit p25
2166	17_18972894_19972894	All_African_meta-analysis	Esophagus_Mucosa	0.998867	ENSG00000108599	AKAP10	A-kinase anchoring protein 10
3090	15_75713980_76713980	All_African_meta-analysis	Tube.NephQTL2	0.998866	ENSG00000169371	SNUPN	snurportin 1
3029	9_97251621_98251621	All_African_meta-analysis	Brain_Hypothalamus	0.998865	ENSG00000165140	FBP1	fructose-bisphosphatase 1
1982	17_58956589_59956589	All_African_meta-analysis	Thyroid	0.998861	ENSG00000108510	MED13	mediator complex subunit 13
2148	17_18972894_19972894	All_African_meta-analysis	Artery_Tibial	0.99885	ENSG00000262074	SNORD3B-2
2166	17_18972894_19972894	All_African_meta-analysis	Breast_Mammary_Tissue	0.99885	ENSG00000083290	ULK2	unc-51 like autophagy activating kinase 2
1716	17_18972894_19972894	All_African_meta-analysis	Brain_Putamen_basal_ganglia	0.998838	ENSG00000230528	NOS2P3
2457	11_64644075_65644075	All_African_meta-analysis	Cells_Cultured_fibroblasts	0.998838	ENSG00000168060	NAALADL1	N-acetylated alpha-linked acidic dipeptidase like 1
2584	15_75713980_76713980	All_African_meta-analysis	Adrenal_Gland	0.998823	ENSG00000169752	NRG4	neuregulin 4
2163	17_18972894_19972894	All_African_meta-analysis	Pituitary	0.998812	ENSG00000270091
3056	15_45639843_46639843	All_African_meta-analysis	Prostate	0.998808	ENSG00000137860	SLC28A2	solute carrier family 28 member 2
2721	9_97251621_98251621	All_African_meta-analysis	Esophagus_Muscularis	0.998801	ENSG00000148110	MFSD14B	major facilitator superfamily domain containing 14B
2927	9_97251621_98251621	All_African_meta-analysis	Whole_Blood	0.998794	ENSG00000185920	PTCH1	patched 1
1785	17_18972894_19972894	All_African_meta-analysis	Esophagus_Mucosa	0.998787	ENSG00000189423	USP32P3
3238	15_44721609_45721609	All_African_meta-analysis	Brain_Frontal_Cortex_BA9	0.998782	ENSG00000185880	TRIM69	tripartite motif containing 69
3241	15_44721609_45721609	All_African_meta-analysis	Brain_Nucleus_accumbens_basal_ganglia	0.998775	ENSG00000137860	SLC28A2	solute carrier family 28 member 2
1982	17_58956589_59956589	All_African_meta-analysis	Cells_Cultured_fibroblasts	0.998772	ENSG00000108510	MED13	mediator complex subunit 13
2457	11_64644075_65644075	All_African_meta-analysis	Prostate	0.99877	ENSG00000270775	EEF1A1P18
2166	17_18972894_19972894	All_African_meta-analysis	Skin_Not_Sun_Exposed_Suprapubic	0.998757	ENSG00000270091
3242	15_44721609_45721609	All_African_meta-analysis	Brain_Caudate_basal_ganglia	0.998754	ENSG00000137857	DUOX1	dual oxidase 1
1785	17_18972894_19972894	All_African_meta-analysis	Stomach	0.99875	ENSG00000189423	USP32P3
2166	17_18972894_19972894	All_African_meta-analysis	Spleen	0.998732	ENSG00000072134	EPN2	epsin 2
2369	17_37234482_38234482	All_African_meta-analysis	Artery_Aorta	0.998729	ENSG00000263874	LASP1NB	LASP1 neighbor
2166	17_18972894_19972894	All_African_meta-analysis	Spleen	0.998728	ENSG00000270091
3035	9_97251621_98251621	All_African_meta-analysis	Liver	0.99872	ENSG00000130957	FBP2	fructose-bisphosphatase 2
3239	15_44721609_45721609	All_African_meta-analysis	Uterus	0.998707	ENSG00000259479	SORD2P
3242	15_44721609_45721609	All_African_meta-analysis	Esophagus_Gastroesophageal_Junction	0.998705	ENSG00000171763	AFG2B	AFG2 AAA ATPase homolog B
2436	11_64644075_65644075	All_African_meta-analysis	Brain_Hippocampus	0.998694	ENSG00000172922	RNASEH2C	ribonuclease H2 subunit C
2731	15_45639843_46639843	All_African_meta-analysis	Brain_Cerebellum	0.998691	ENSG00000259539
2584	15_75713980_76713980	All_African_meta-analysis	Nerve_Tibial	0.998675	ENSG00000140374	ETFA	electron transfer flavoprotein subunit alpha
2126	17_18972894_19972894	All_African_meta-analysis	Cells_EBV-transformed_lymphocytes	0.998674	ENSG00000265185	SNORD3B-1
2137	17_18972894_19972894	All_African_meta-analysis	Brain_Nucleus_accumbens_basal_ganglia	0.99867	ENSG00000262681
2402	17_58956589_59956589	All_African_meta-analysis	Skin_Sun_Exposed_Lower_leg	0.998663	ENSG00000267280	TBX2-AS1	TBX2 antisense RNA 1
4829	6_160174632_161174632	All_African_meta-analysis	TGP_Cell_lines	0.998659	ENSG00000112096.19
2385	15_75713980_76713980	All_African_meta-analysis	Adipose_Visceral_Omentum	0.998642	ENSG00000140365	COMMD4	COMM domain containing 4
2720	17_37234482_38234482	All_African_meta-analysis	Thyroid	0.99863	ENSG00000188895	MSL1	MSL complex subunit 1
3382	15_45639843_46639843	All_African_meta-analysis	Lung	0.998624	ENSG00000137767	SQOR	sulfide quinone oxidoreductase
2166	17_18972894_19972894	All_African_meta-analysis	Artery_Tibial	0.998615	ENSG00000128482	RNF112	ring finger protein 112
3564	6_160174632_161174632	All_African_meta-analysis	Breast_Mammary_Tissue	0.998614	ENSG00000197081	IGF2R	insulin like growth factor 2 receptor
1785	17_18972894_19972894	All_African_meta-analysis	Adrenal_Gland	0.998605	ENSG00000189423	USP32P3
3242	15_44721609_45721609	All_African_meta-analysis	Lung	0.998599	ENSG00000171766	GATM	glycine amidinotransferase
2452	15_75713980_76713980	All_African_meta-analysis	Brain_Amygdala	0.998599	ENSG00000140400	MAN2C1	mannosidase alpha class 2C member 1
2912	17_37234482_38234482	All_African_meta-analysis	Cells_Cultured_fibroblasts	0.998588	ENSG00000141750	STAC2	SH3 and cysteine rich domain 2
3382	15_45639843_46639843	All_African_meta-analysis	Esophagus_Gastroesophageal_Junction	0.998584	ENSG00000171763	AFG2B	AFG2 AAA ATPase homolog B
2456	11_64644075_65644075	All_African_meta-analysis	Minor_Salivary_Gland	0.998559	ENSG00000245532	NEAT1	nuclear paraspeckle assembly transcript 1
2148	17_18972894_19972894	All_African_meta-analysis	Skin_Sun_Exposed_Lower_leg	0.998556	ENSG00000262074	SNORD3B-2
1995	17_18972894_19972894	All_African_meta-analysis	Adipose_Visceral_Omentum	0.998554	ENSG00000279825
2631	9_97251621_98251621	All_African_meta-analysis	Esophagus_Mucosa	0.998551	ENSG00000232063
3242	15_44721609_45721609	All_African_meta-analysis	Stomach	0.99854	ENSG00000259433
2137	17_18972894_19972894	All_African_meta-analysis	Brain_Nucleus_accumbens_basal_ganglia	0.998538	ENSG00000235979
1980	17_18972894_19972894	All_African_meta-analysis	Lung	0.998523	ENSG00000154898	CCDC144CP
2402	17_58956589_59956589	All_African_meta-analysis	Breast_Mammary_Tissue	0.998511	ENSG00000136492	BRIP1	BRCA1 interacting helicase 1
2166	17_18972894_19972894	All_African_meta-analysis	Adipose_Subcutaneous	0.998506	ENSG00000231625	SLC47A1P2
4414	21_44912872_45912872	All_African_meta-analysis	Tube.NephQTL2	0.998487	ENSG00000280071		glutamine amidotransferase class 1 domain containing 3B
2439	11_64644075_65644075	All_African_meta-analysis	Brain_Amygdala	0.998481	ENSG00000245532	NEAT1	nuclear paraspeckle assembly transcript 1
2166	17_18972894_19972894	All_African_meta-analysis	Esophagus_Muscularis	0.99848	ENSG00000128482	RNF112	ring finger protein 112
2811	17_18972894_19972894	All_African_meta-analysis	Glom.NephQTL2	0.998478	ENSG00000236022
2584	15_75713980_76713980	All_African_meta-analysis	Nerve_Tibial	0.998445	ENSG00000196274
2912	17_37234482_38234482	All_African_meta-analysis	Stomach	0.998439	ENSG00000264968
2456	11_64644075_65644075	All_African_meta-analysis	Minor_Salivary_Gland	0.998435	ENSG00000173327	MAP3K11	mitogen-activated protein kinase kinase kinase 11
2457	11_64644075_65644075	All_African_meta-analysis	Artery_Aorta	0.998434	ENSG00000197847	SLC22A20P
2137	17_18972894_19972894	All_African_meta-analysis	Brain_Nucleus_accumbens_basal_ganglia	0.998387	ENSG00000261033	SPECC1-DT
3459	6_160174632_161174632	All_African_meta-analysis	Artery_Aorta	0.998385	ENSG00000146457	WTAP	WT1 associated protein
3026	9_97251621_98251621	All_African_meta-analysis	Brain_Cerebellum	0.998358	ENSG00000158169	FANCC	FA complementation group C
3026	9_97251621_98251621	All_African_meta-analysis	Brain_Cerebellum	0.998358	ENSG00000158169	FANCC	uncharacterized LOC105376156
3239	15_44721609_45721609	All_African_meta-analysis	Ovary	0.998343	ENSG00000185880	TRIM69	tripartite motif containing 69
2886	11_64644075_65644075	All_African_meta-analysis	TGP_Cell_lines	0.998318	ENSG00000175334.8	BANF1	BAF nuclear assembly factor 1
2123	17_18972894_19972894	All_African_meta-analysis	Brain_Hypothalamus	0.998317	ENSG00000261033	SPECC1-DT
3240	15_44721609_45721609	All_African_meta-analysis	Minor_Salivary_Gland	0.998316	ENSG00000140263	SORD	sorbitol dehydrogenase
3035	9_97251621_98251621	All_African_meta-analysis	Colon_Transverse	0.998314	ENSG00000130957	FBP2	fructose-bisphosphatase 2
3242	15_44721609_45721609	All_African_meta-analysis	Muscle_Skeletal	0.998312	ENSG00000137857	DUOX1	dual oxidase 1
2457	11_64644075_65644075	All_African_meta-analysis	Pancreas	0.998312	ENSG00000254470	AP5B1	adaptor related protein complex 5 subunit beta 1
3242	15_44721609_45721609	All_African_meta-analysis	Muscle_Skeletal	0.998277	ENSG00000171763	AFG2B	AFG2 AAA ATPase homolog B
2453	11_64644075_65644075	All_African_meta-analysis	Brain_Frontal_Cortex_BA9	0.998258	ENSG00000214659	KRT8P26
2861	17_37234482_38234482	All_African_meta-analysis	Skin_Sun_Exposed_Lower_leg	0.998244	ENSG00000263818	RDM1P5
3026	6_160174632_161174632	All_African_meta-analysis	Colon_Transverse	0.99824	ENSG00000237927
2720	9_97251621_98251621	All_African_meta-analysis	Adrenal_Gland	0.998235	ENSG00000148110	MFSD14B	major facilitator superfamily domain containing 14B
3241	15_44721609_45721609	All_African_meta-analysis	Small_Intestine_Terminal_Ileum	0.998233	ENSG00000138606	SHF	Src homology 2 domain containing F
3035	9_97251621_98251621	All_African_meta-analysis	Cells_Cultured_fibroblasts	0.99823	ENSG00000148120	AOPEP	aminopeptidase O (putative)
6959	11_4707604_5707604	All_African_meta-analysis	Tube.NephQTL2	0.998208	ENSG00000175518	UBQLNL	ubiquilin like
3564	6_160174632_161174632	All_African_meta-analysis	Heart_Left_Ventricle	0.998186	ENSG00000146477	SLC22A3	solute carrier family 22 member 3
2912	17_37234482_38234482	All_African_meta-analysis	Artery_Tibial	0.998185	ENSG00000108306	FBXL20	F-box and leucine rich repeat protein 20
2912	17_37234482_38234482	All_African_meta-analysis	Adipose_Visceral_Omentum	0.998169	ENSG00000141744	PNMT	phenylethanolamine N-methyltransferase
2385	15_75713980_76713980	All_African_meta-analysis	Esophagus_Gastroesophageal_Junction	0.998165	ENSG00000140365	COMMD4	COMM domain containing 4
2457	11_64644075_65644075	All_African_meta-analysis	Whole_Blood	0.998161	ENSG00000260233	ZNRD2-DT
3382	15_45639843_46639843	All_African_meta-analysis	Whole_Blood	0.998126	ENSG00000171766	GATM	glycine amidinotransferase
1785	17_18972894_19972894	All_African_meta-analysis	Lung	0.998123	ENSG00000189423	USP32P3
2721	9_97251621_98251621	All_African_meta-analysis	Lung	0.998121	ENSG00000148110	MFSD14B	major facilitator superfamily domain containing 14B
1785	17_18972894_19972894	All_African_meta-analysis	Esophagus_Gastroesophageal_Junction	0.998119	ENSG00000189423	USP32P3
2457	11_64644075_65644075	All_African_meta-analysis	Colon_Transverse	0.998116	ENSG00000014216	CAPN1	calpain 1
2166	17_18972894_19972894	All_African_meta-analysis	Testis	0.998112	ENSG00000228157
3035	9_97251621_98251621	All_African_meta-analysis	Nerve_Tibial	0.9981	ENSG00000165140	FBP1	fructose-bisphosphatase 1
2966	9_97251621_98251621	All_African_meta-analysis	Nerve_Tibial	0.998075	ENSG00000271155
2584	15_75713980_76713980	All_African_meta-analysis	Adrenal_Gland	0.998072	ENSG00000169371	SNUPN	snurportin 1
2166	17_18972894_19972894	All_African_meta-analysis	Esophagus_Mucosa	0.998059	ENSG00000262681
3222	15_45639843_46639843	All_African_meta-analysis	Kidney_Cortex	0.998048	ENSG00000259433
3026	6_160174632_161174632	All_African_meta-analysis	Adrenal_Gland	0.998023	ENSG00000237927
3067	15_44721609_45721609	All_African_meta-analysis	Lung	0.998012	ENSG00000179362	HMGN2P46
2457	11_64644075_65644075	All_African_meta-analysis	Artery_Tibial	0.998011	ENSG00000173727	FAUP4
2166	17_18972894_19972894	All_African_meta-analysis	Esophagus_Gastroesophageal_Junction	0.998009	ENSG00000261033	SPECC1-DT
2912	17_37234482_38234482	All_African_meta-analysis	Esophagus_Mucosa	0.998004	ENSG00000073605	GSDMB	gasdermin B
2457	11_64644075_65644075	All_African_meta-analysis	Adipose_Subcutaneous	0.997997	ENSG00000173338	KCNK7	potassium two pore domain channel subfamily K member 7
3564	6_160174632_161174632	All_African_meta-analysis	Thyroid	0.997997	ENSG00000146477	SLC22A3	solute carrier family 22 member 3
2904	17_37234482_38234482	All_African_meta-analysis	Vagina	0.997989	ENSG00000008838	MED24	mediator complex subunit 24
3242	15_44721609_45721609	All_African_meta-analysis	Heart_Atrial_Appendage	0.997984	ENSG00000171763	AFG2B	AFG2 AAA ATPase homolog B
2912	17_37234482_38234482	All_African_meta-analysis	Adipose_Subcutaneous	0.997967	ENSG00000108306	FBXL20	F-box and leucine rich repeat protein 20
3382	15_45639843_46639843	All_African_meta-analysis	Lung	0.997964	ENSG00000171766	GATM	glycine amidinotransferase
2402	17_58956589_59956589	All_African_meta-analysis	Thyroid	0.997955	ENSG00000267131		uncharacterized LOC101927855
3980	15_44721609_45721609	All_African_meta-analysis	Glom.NephQTL2	0.997922	ENSG00000171763	AFG2B	AFG2 AAA ATPase homolog B
3563	6_160174632_161174632	All_African_meta-analysis	Liver	0.997917	ENSG00000198670	LPA	lipoprotein(a)
2457	11_64644075_65644075	All_African_meta-analysis	Artery_Tibial	0.997917	ENSG00000162298	SYVN1	synoviolin 1
2446	11_64644075_65644075	All_African_meta-analysis	Vagina	0.997912	ENSG00000245532	NEAT1	nuclear paraspeckle assembly transcript 1
2912	17_37234482_38234482	All_African_meta-analysis	Esophagus_Mucosa	0.997899	ENSG00000108344	PSMD3	proteasome 26S subunit, non-ATPase 3
2912	17_37234482_38234482	All_African_meta-analysis	Heart_Left_Ventricle	0.997894	ENSG00000141744	PNMT	phenylethanolamine N-methyltransferase
1670	17_18972894_19972894	All_African_meta-analysis	Small_Intestine_Terminal_Ileum	0.997833	ENSG00000170298	LGALS9B	galectin 9B
2457	11_64644075_65644075	All_African_meta-analysis	Pituitary	0.99782	ENSG00000173327	MAP3K11	mitogen-activated protein kinase kinase kinase 11
4171	15_45639843_46639843	All_African_meta-analysis	Glom.NephQTL2	0.99778	ENSG00000171763	AFG2B	AFG2 AAA ATPase homolog B
2166	17_18972894_19972894	All_African_meta-analysis	Artery_Aorta	0.997779	ENSG00000108599	AKAP10	A-kinase anchoring protein 10
2811	17_18972894_19972894	All_African_meta-analysis	Glom.NephQTL2	0.997756	ENSG00000266311
2457	11_64644075_65644075	All_African_meta-analysis	Esophagus_Muscularis	0.997739	ENSG00000172757	CFL1	cofilin 1
3242	15_44721609_45721609	All_African_meta-analysis	Adipose_Visceral_Omentum	0.997695	ENSG00000259539
3382	15_45639843_46639843	All_African_meta-analysis	Heart_Atrial_Appendage	0.997695	ENSG00000171763	AFG2B	AFG2 AAA ATPase homolog B
2457	11_64644075_65644075	All_African_meta-analysis	Brain_Caudate_basal_ganglia	0.997694	ENSG00000110025	SNX15	sorting nexin 15
3019	9_97251621_98251621	All_African_meta-analysis	Pituitary	0.99769	ENSG00000130957	FBP2	fructose-bisphosphatase 2
3236	15_44721609_45721609	All_African_meta-analysis	Pituitary	0.997684	ENSG00000259539
3564	6_160174632_161174632	All_African_meta-analysis	Adipose_Subcutaneous	0.997681	ENSG00000213073	CHP1P2
2631	9_97251621_98251621	All_African_meta-analysis	Spleen	0.997679	ENSG00000232063
2166	17_18972894_19972894	All_African_meta-analysis	Artery_Tibial	0.997654	ENSG00000228983	SLC47A1P1
2457	11_64644075_65644075	All_African_meta-analysis	Esophagus_Mucosa	0.997653	ENSG00000255557
2463	15_75713980_76713980	All_African_meta-analysis	Liver	0.99765	ENSG00000260274
3138	15_45639843_46639843	All_African_meta-analysis	Cells_EBV-transformed_lymphocytes	0.997635	ENSG00000259520	SLC28A2-AS1
3564	6_160174632_161174632	All_African_meta-analysis	Whole_Blood	0.997622	ENSG00000146453	PNLDC1	PARN like ribonuclease domain containing exonuclease 1
2457	11_64644075_65644075	All_African_meta-analysis	Heart_Left_Ventricle	0.997577	ENSG00000260233	ZNRD2-DT
2457	11_64644075_65644075	All_African_meta-analysis	Pancreas	0.997543	ENSG00000197847	SLC22A20P
2079	17_18972894_19972894	All_African_meta-analysis	Brain_Amygdala	0.997543	ENSG00000261033	SPECC1-DT
3286	17_18972894_19972894	All_African_meta-analysis	TGP_Cell_lines	0.997537	ENSG00000228157.4
2385	15_75713980_76713980	All_African_meta-analysis	Lung	0.997531	ENSG00000140365	COMMD4	COMM domain containing 4
3382	15_45639843_46639843	All_African_meta-analysis	Muscle_Skeletal	0.997527	ENSG00000171763	AFG2B	AFG2 AAA ATPase homolog B
2457	11_64644075_65644075	All_African_meta-analysis	Heart_Left_Ventricle	0.997486	ENSG00000213465	ARL2	ADP ribosylation factor like GTPase 2
3035	9_97251621_98251621	All_African_meta-analysis	Stomach	0.99747	ENSG00000130957	FBP2	fructose-bisphosphatase 2
3782	15_45639843_46639843	All_African_meta-analysis	Tube.NephQTL2	0.997449	ENSG00000137860	SLC28A2	solute carrier family 28 member 2
2166	17_18972894_19972894	All_African_meta-analysis	Esophagus_Gastroesophageal_Junction	0.997443	ENSG00000231625	SLC47A1P2
2457	11_64644075_65644075	All_African_meta-analysis	Artery_Aorta	0.997438	ENSG00000173727	FAUP4
2912	17_37234482_38234482	All_African_meta-analysis	Esophagus_Gastroesophageal_Junction	0.997428	ENSG00000161395	PGAP3	post-GPI attachment to proteins phospholipase 3
2912	17_37234482_38234482	All_African_meta-analysis	Heart_Left_Ventricle	0.997422	ENSG00000264968
2402	17_58956589_59956589	All_African_meta-analysis	Ovary	0.997402	ENSG00000136492	BRIP1	BRCA1 interacting helicase 1
3035	9_97251621_98251621	All_African_meta-analysis	Esophagus_Mucosa	0.9974	ENSG00000148120	AOPEP	aminopeptidase O (putative)
3242	15_44721609_45721609	All_African_meta-analysis	Cells_Cultured_fibroblasts	0.997383	ENSG00000259539
3564	6_160174632_161174632	All_African_meta-analysis	Breast_Mammary_Tissue	0.997382	ENSG00000175003	SLC22A1	solute carrier family 22 member 1
2401	17_58956589_59956589	All_African_meta-analysis	Brain_Cortex	0.997376	ENSG00000136492	BRIP1	BRCA1 interacting helicase 1
2402	17_58956589_59956589	All_African_meta-analysis	Lung	0.997371	ENSG00000136492	BRIP1	BRCA1 interacting helicase 1
2457	11_64644075_65644075	All_African_meta-analysis	Adipose_Visceral_Omentum	0.997366	ENSG00000172638	EFEMP2	EGF containing fibulin extracellular matrix protein 2
2166	17_18972894_19972894	All_African_meta-analysis	Stomach	0.997353	ENSG00000262319
2166	17_18972894_19972894	All_African_meta-analysis	Pancreas	0.997349	ENSG00000108599	AKAP10	A-kinase anchoring protein 10
2584	15_75713980_76713980	All_African_meta-analysis	Pancreas	0.997338	ENSG00000169371	SNUPN	snurportin 1
2615	9_97251621_98251621	All_African_meta-analysis	Pituitary	0.997311	ENSG00000232063
2450	11_64644075_65644075	All_African_meta-analysis	Uterus	0.99731	ENSG00000245532	NEAT1	nuclear paraspeckle assembly transcript 1
2457	11_64644075_65644075	All_African_meta-analysis	Whole_Blood	0.997296	ENSG00000213445	SIPA1	signal-induced proliferation-associated 1
2457	11_64644075_65644075	All_African_meta-analysis	Esophagus_Gastroesophageal_Junction	0.997292	ENSG00000213465	ARL2	ADP ribosylation factor like GTPase 2
2438	11_64644075_65644075	All_African_meta-analysis	Breast_Mammary_Tissue	0.997274	ENSG00000172500	FIBP	FGF1 intracellular binding protein
3130	15_45639843_46639843	All_African_meta-analysis	Brain_Substantia_nigra	0.997244	ENSG00000259520	SLC28A2-AS1
3241	15_44721609_45721609	All_African_meta-analysis	Cells_EBV-transformed_lymphocytes	0.99721	ENSG00000171763	AFG2B	AFG2 AAA ATPase homolog B
2912	17_37234482_38234482	All_African_meta-analysis	Muscle_Skeletal	0.997155	ENSG00000173991	TCAP	titin-cap
2457	11_64644075_65644075	All_African_meta-analysis	Adipose_Visceral_Omentum	0.99714	ENSG00000168061	SAC3D1	SAC3 domain containing 1
1709	17_18972894_19972894	All_African_meta-analysis	Brain_Hypothalamus	0.997134	ENSG00000230528	NOS2P3
1250	15_75713980_76713980	All_African_meta-analysis	Nerve_Tibial	0.997107	ENSG00000178718	RPP25	ribonuclease P and MRP subunit p25
2166	17_18972894_19972894	All_African_meta-analysis	Adipose_Visceral_Omentum	0.997081	ENSG00000108599	AKAP10	A-kinase anchoring protein 10
3242	15_44721609_45721609	All_African_meta-analysis	Adipose_Visceral_Omentum	0.997079	ENSG00000140263	SORD	sorbitol dehydrogenase
4353	6_160174632_161174632	All_African_meta-analysis	Tube.NephQTL2	0.997057	ENSG00000112110	MRPL18	mitochondrial ribosomal protein L18
2584	15_75713980_76713980	All_African_meta-analysis	Pancreas	0.997025	ENSG00000169758	TMEM266	transmembrane protein 266
2389	15_44721609_45721609	All_African_meta-analysis	Colon_Transverse	0.997016	ENSG00000171877	FRMD5	FERM domain containing 5
2457	11_64644075_65644075	All_African_meta-analysis	Esophagus_Mucosa	0.997016	ENSG00000014138	POLA2	DNA polymerase alpha 2, accessory subunit
2166	17_18972894_19972894	All_African_meta-analysis	Esophagus_Muscularis	0.997008	ENSG00000227078	LINC02094
3240	15_44721609_45721609	All_African_meta-analysis	Brain_Putamen_basal_ganglia	0.996999	ENSG00000259539
2457	11_64644075_65644075	All_African_meta-analysis	Breast_Mammary_Tissue	0.996993	ENSG00000110025	SNX15	sorting nexin 15
2136	17_18972894_19972894	All_African_meta-analysis	Brain_Putamen_basal_ganglia	0.996979	ENSG00000262681
3242	15_44721609_45721609	All_African_meta-analysis	Lung	0.996977	ENSG00000140274	DUOXA2	dual oxidase maturation factor 2
2166	17_18972894_19972894	All_African_meta-analysis	Skin_Not_Sun_Exposed_Suprapubic	0.996975	ENSG00000128487	SPECC1	sperm antigen with calponin homology and coiled-coil domains 1
2402	17_58956589_59956589	All_African_meta-analysis	Skin_Not_Sun_Exposed_Suprapubic	0.996975	ENSG00000121068	TBX2	T-box transcription factor 2
2912	17_37234482_38234482	All_African_meta-analysis	Artery_Aorta	0.996892	ENSG00000108306	FBXL20	F-box and leucine rich repeat protein 20
3459	6_160174632_161174632	All_African_meta-analysis	Lung	0.996886	ENSG00000146457	WTAP	WT1 associated protein
3242	15_44721609_45721609	All_African_meta-analysis	Brain_Cortex	0.996884	ENSG00000259539
1707	17_18972894_19972894	All_African_meta-analysis	Brain_Anterior_cingulate_cortex_BA24	0.996858	ENSG00000230528	NOS2P3
3242	15_44721609_45721609	All_African_meta-analysis	Nerve_Tibial	0.996855	ENSG00000137857	DUOX1	dual oxidase 1
1785	17_18972894_19972894	All_African_meta-analysis	Artery_Tibial	0.996802	ENSG00000189423	USP32P3
2457	11_64644075_65644075	All_African_meta-analysis	Prostate	0.996771	ENSG00000197847	SLC22A20P
2582	15_75713980_76713980	All_African_meta-analysis	Brain_Hypothalamus	0.996767	ENSG00000260685
3242	15_44721609_45721609	All_African_meta-analysis	Heart_Left_Ventricle	0.996738	ENSG00000171763	AFG2B	AFG2 AAA ATPase homolog B
3242	15_44721609_45721609	All_African_meta-analysis	Cells_Cultured_fibroblasts	0.996732	ENSG00000138606	SHF	Src homology 2 domain containing F
2413	15_75713980_76713980	All_African_meta-analysis	Adipose_Visceral_Omentum	0.996704	ENSG00000140398	NEIL1	nei like DNA glycosylase 1
3035	9_97251621_98251621	All_African_meta-analysis	Skin_Not_Sun_Exposed_Suprapubic	0.99667	ENSG00000148120	AOPEP	aminopeptidase O (putative)
2457	11_64644075_65644075	All_African_meta-analysis	Esophagus_Muscularis	0.996656	ENSG00000173338	KCNK7	potassium two pore domain channel subfamily K member 7
[truncated: 2,392 more rows]

## Sheet: HighPP3Kidney
nsnps	Locus	Trait	Tissue	PP.H3.abf	gene_id	hgnc_symbol	wikigene_description
3850	15_44721609_45721609	All_African_meta-analysis	Tube.NephQTL2	1	ENSG00000171763	AFG2B	AFG2 AAA ATPase homolog B
4072	15_45639843_46639843	All_African_meta-analysis	Tube.NephQTL2	1	ENSG00000171763	AFG2B	AFG2 AAA ATPase homolog B
6959	11_4707604_5707604	All_African_meta-analysis	Tube.NephQTL2	1	ENSG00000121236	TRIM6	tripartite motif containing 6
3850	15_44721609_45721609	All_African_meta-analysis	Tube.NephQTL2	1	ENSG00000259520	SLC28A2-AS1
3850	15_44721609_45721609	All_African_meta-analysis	Tube.NephQTL2	1	ENSG00000185880	TRIM69	tripartite motif containing 69
3980	15_44721609_45721609	All_African_meta-analysis	Glom.NephQTL2	1	ENSG00000259479	SORD2P
3850	15_44721609_45721609	All_African_meta-analysis	Tube.NephQTL2	1	ENSG00000259479	SORD2P
3850	15_44721609_45721609	All_African_meta-analysis	Tube.NephQTL2	1	ENSG00000137860	SLC28A2	solute carrier family 28 member 2
3980	15_44721609_45721609	All_African_meta-analysis	Glom.NephQTL2	1	ENSG00000259520	SLC28A2-AS1
6959	11_4707604_5707604	All_African_meta-analysis	Tube.NephQTL2	1	ENSG00000258588	TRIM6-TRIM34	TRIM6-TRIM34 readthrough
3980	15_44721609_45721609	All_African_meta-analysis	Glom.NephQTL2	1	ENSG00000185880	TRIM69	tripartite motif containing 69
3697	17_37234482_38234482	All_African_meta-analysis	Glom.NephQTL2	1	ENSG00000167914	GSDMA	gasdermin A
3697	17_37234482_38234482	All_African_meta-analysis	Glom.NephQTL2	1	ENSG00000108344	PSMD3	proteasome 26S subunit, non-ATPase 3
3565	17_37234482_38234482	All_African_meta-analysis	Tube.NephQTL2	1	ENSG00000161395	PGAP3	post-GPI attachment to proteins phospholipase 3
3565	17_37234482_38234482	All_African_meta-analysis	Tube.NephQTL2	1	ENSG00000167914	GSDMA	gasdermin A
6959	11_4707604_5707604	All_African_meta-analysis	Tube.NephQTL2	1	ENSG00000132256	TRIM5	tripartite motif containing 5
4072	15_45639843_46639843	All_African_meta-analysis	Tube.NephQTL2	1	ENSG00000104154	SLC30A4	solute carrier family 30 member 4
3325	17_37234482_38234482	All_African_meta-analysis	Tube.NephQTL2	1	ENSG00000266588
3565	17_37234482_38234482	All_African_meta-analysis	Tube.NephQTL2	1	ENSG00000263818	RDM1P5
7298	11_4707604_5707604	All_African_meta-analysis	Glom.NephQTL2	1	ENSG00000121236	TRIM6	tripartite motif containing 6
2948	15_75713980_76713980	All_African_meta-analysis	Tube.NephQTL2	1	ENSG00000140400	MAN2C1	mannosidase alpha class 2C member 1
6959	11_4707604_5707604	All_African_meta-analysis	Tube.NephQTL2	1	ENSG00000258659	TRIM34	tripartite motif containing 34
3090	15_75713980_76713980	All_African_meta-analysis	Tube.NephQTL2	1	ENSG00000260269
3850	15_44721609_45721609	All_African_meta-analysis	Tube.NephQTL2	1	ENSG00000140263	SORD	sorbitol dehydrogenase
6959	11_4707604_5707604	All_African_meta-analysis	Tube.NephQTL2	0.999997	ENSG00000167355	OR51B5	olfactory receptor family 51 subfamily B member 5
3194	15_75713980_76713980	All_African_meta-analysis	Glom.NephQTL2	0.999996	ENSG00000169752	NRG4	neuregulin 4
6959	11_4707604_5707604	All_African_meta-analysis	Tube.NephQTL2	0.999993	ENSG00000213931	HBE1	hemoglobin subunit epsilon 1
3697	17_37234482_38234482	All_African_meta-analysis	Glom.NephQTL2	0.999988	ENSG00000141744	PNMT	phenylethanolamine N-methyltransferase
4353	6_160174632_161174632	All_African_meta-analysis	Tube.NephQTL2	0.999988	ENSG00000198670	LPA	lipoprotein(a)
4353	6_160174632_161174632	All_African_meta-analysis	Tube.NephQTL2	0.999988	ENSG00000122194	PLG	plasminogen
4353	6_160174632_161174632	All_African_meta-analysis	Tube.NephQTL2	0.999988	ENSG00000213071	LPAL2
4479	6_160174632_161174632	All_African_meta-analysis	Glom.NephQTL2	0.999988	ENSG00000112110	MRPL18	mitochondrial ribosomal protein L18
4353	6_160174632_161174632	All_African_meta-analysis	Tube.NephQTL2	0.999988	ENSG00000230234
4414	21_44912872_45912872	All_African_meta-analysis	Tube.NephQTL2	0.999911	ENSG00000142182	DNMT3L	DNA methyltransferase 3 like
4414	21_44912872_45912872	All_African_meta-analysis	Tube.NephQTL2	0.999911	ENSG00000232010	DNMT3L-AS1	DNMT3L antisense RNA 1
4516	21_44912872_45912872	All_African_meta-analysis	Glom.NephQTL2	0.999911	ENSG00000160226	CFAP410	cilia and flagella associated protein 410
4414	21_44912872_45912872	All_African_meta-analysis	Tube.NephQTL2	0.999911	ENSG00000160226	CFAP410	cilia and flagella associated protein 410
4414	21_44912872_45912872	All_African_meta-analysis	Tube.NephQTL2	0.999911	ENSG00000160213	CSTB	cystatin B
4516	21_44912872_45912872	All_African_meta-analysis	Glom.NephQTL2	0.999911	ENSG00000160213	CSTB	cystatin B
4414	21_44912872_45912872	All_African_meta-analysis	Tube.NephQTL2	0.999911	ENSG00000141959	PFKL	phosphofructokinase, liver type
4516	21_44912872_45912872	All_African_meta-analysis	Glom.NephQTL2	0.999911	ENSG00000277117		ICOS ligand
4516	21_44912872_45912872	All_African_meta-analysis	Glom.NephQTL2	0.99991	ENSG00000160223	ICOSLG	inducible T cell costimulator ligand
4516	21_44912872_45912872	All_African_meta-analysis	Glom.NephQTL2	0.99991	ENSG00000160223	ICOSLG	ICOS ligand
4414	21_44912872_45912872	All_African_meta-analysis	Tube.NephQTL2	0.99991	ENSG00000160223	ICOSLG	inducible T cell costimulator ligand
4414	21_44912872_45912872	All_African_meta-analysis	Tube.NephQTL2	0.99991	ENSG00000160223	ICOSLG	ICOS ligand
4414	21_44912872_45912872	All_African_meta-analysis	Tube.NephQTL2	0.99991	ENSG00000277117		ICOS ligand
2735	11_64644075_65644075	All_African_meta-analysis	Tube.NephQTL2	0.99989	ENSG00000255120	OVOL1-AS1	OVOL1 antisense RNA 1
3016	11_64644075_65644075	All_African_meta-analysis	Glom.NephQTL2	0.99989	ENSG00000172757	CFL1	cofilin 1
2735	11_64644075_65644075	All_African_meta-analysis	Tube.NephQTL2	0.99989	ENSG00000014216	CAPN1	calpain 1
2735	11_64644075_65644075	All_African_meta-analysis	Tube.NephQTL2	0.99989	ENSG00000162298	SYVN1	synoviolin 1
2735	11_64644075_65644075	All_African_meta-analysis	Tube.NephQTL2	0.99989	ENSG00000172922	RNASEH2C	ribonuclease H2 subunit C
2735	11_64644075_65644075	All_African_meta-analysis	Tube.NephQTL2	0.99989	ENSG00000172803	SNX32	sorting nexin 32
2381	11_64644075_65644075	All_African_meta-analysis	Kidney_Cortex	0.99989	ENSG00000254614	CAPN1-AS1	CAPN1 antisense RNA 1
3016	11_64644075_65644075	All_African_meta-analysis	Glom.NephQTL2	0.99989	ENSG00000254614	CAPN1-AS1	CAPN1 antisense RNA 1
2735	11_64644075_65644075	All_African_meta-analysis	Tube.NephQTL2	0.999889	ENSG00000254614	CAPN1-AS1	CAPN1 antisense RNA 1
2728	11_64644075_65644075	All_African_meta-analysis	Tube.NephQTL2	0.999888	ENSG00000172543	CTSW	cathepsin W
4414	21_44912872_45912872	All_African_meta-analysis	Tube.NephQTL2	0.999885	ENSG00000275799
3141	15_44721609_45721609	All_African_meta-analysis	Kidney_Cortex	0.999867	ENSG00000259520	SLC28A2-AS1
3016	11_64644075_65644075	All_African_meta-analysis	Glom.NephQTL2	0.999816	ENSG00000162298	SYVN1	synoviolin 1
4414	21_44912872_45912872	All_African_meta-analysis	Tube.NephQTL2	0.999764	ENSG00000160221	GATD3	glutamine amidotransferase class 1 domain containing 3
2301	15_75713980_76713980	All_African_meta-analysis	Kidney_Cortex	0.999673	ENSG00000140400	MAN2C1	mannosidase alpha class 2C member 1
3141	15_44721609_45721609	All_African_meta-analysis	Kidney_Cortex	0.999608	ENSG00000259433
2732	17_18972894_19972894	All_African_meta-analysis	Tube.NephQTL2	0.999608	ENSG00000108602	ALDH3A1	aldehyde dehydrogenase 3 family member A1
2732	17_18972894_19972894	All_African_meta-analysis	Tube.NephQTL2	0.999595	ENSG00000180638	SLC47A2	solute carrier family 47 member 2
4353	6_160174632_161174632	All_African_meta-analysis	Tube.NephQTL2	0.99953	ENSG00000224477
2811	17_18972894_19972894	All_African_meta-analysis	Glom.NephQTL2	0.999377	ENSG00000281856
3493	17_37234482_38234482	All_African_meta-analysis	Tube.NephQTL2	0.99935	ENSG00000214553	LRRC37A11P
2811	17_18972894_19972894	All_African_meta-analysis	Glom.NephQTL2	0.99932	ENSG00000228157
2840	17_37234482_38234482	All_African_meta-analysis	Kidney_Cortex	0.999299	ENSG00000167914	GSDMA	gasdermin A
3565	17_37234482_38234482	All_African_meta-analysis	Tube.NephQTL2	0.999144	ENSG00000264968
2882	17_58956589_59956589	All_African_meta-analysis	Glom.NephQTL2	0.999119	ENSG00000267280	TBX2-AS1	TBX2 antisense RNA 1
2783	17_58956589_59956589	All_African_meta-analysis	Tube.NephQTL2	0.99909	ENSG00000267280	TBX2-AS1	TBX2 antisense RNA 1
3566	9_97251621_98251621	All_African_meta-analysis	Tube.NephQTL2	0.998938	ENSG00000231806	PCAT7
3785	15_45639843_46639843	All_African_meta-analysis	Tube.NephQTL2	0.998914	ENSG00000259520	SLC28A2-AS1
3566	9_97251621_98251621	All_African_meta-analysis	Tube.NephQTL2	0.998908	ENSG00000165140	FBP1	fructose-bisphosphatase 1
3090	15_75713980_76713980	All_African_meta-analysis	Tube.NephQTL2	0.998866	ENSG00000169371	SNUPN	snurportin 1
4414	21_44912872_45912872	All_African_meta-analysis	Tube.NephQTL2	0.998487	ENSG00000280071		glutamine amidotransferase class 1 domain containing 3B
2811	17_18972894_19972894	All_African_meta-analysis	Glom.NephQTL2	0.998478	ENSG00000236022
6959	11_4707604_5707604	All_African_meta-analysis	Tube.NephQTL2	0.998208	ENSG00000175518	UBQLNL	ubiquilin like
3222	15_45639843_46639843	All_African_meta-analysis	Kidney_Cortex	0.998048	ENSG00000259433
3980	15_44721609_45721609	All_African_meta-analysis	Glom.NephQTL2	0.997922	ENSG00000171763	AFG2B	AFG2 AAA ATPase homolog B
4171	15_45639843_46639843	All_African_meta-analysis	Glom.NephQTL2	0.99778	ENSG00000171763	AFG2B	AFG2 AAA ATPase homolog B
2811	17_18972894_19972894	All_African_meta-analysis	Glom.NephQTL2	0.997756	ENSG00000266311
3782	15_45639843_46639843	All_African_meta-analysis	Tube.NephQTL2	0.997449	ENSG00000137860	SLC28A2	solute carrier family 28 member 2
4353	6_160174632_161174632	All_African_meta-analysis	Tube.NephQTL2	0.997057	ENSG00000112110	MRPL18	mitochondrial ribosomal protein L18
3128	12_16657119_17657119	All_African_meta-analysis	Tube.NephQTL2	0.996096	ENSG00000048540	LMO3	LIM domain only 3
6959	11_4707604_5707604	All_African_meta-analysis	Tube.NephQTL2	0.9952	ENSG00000224295	OLFM5P
2732	17_18972894_19972894	All_African_meta-analysis	Tube.NephQTL2	0.994826	ENSG00000142494	SLC47A1	solute carrier family 47 member 1
2732	17_18972894_19972894	All_African_meta-analysis	Tube.NephQTL2	0.99449	ENSG00000108599	AKAP10	A-kinase anchoring protein 10
2735	11_64644075_65644075	All_African_meta-analysis	Tube.NephQTL2	0.993476	ENSG00000173327	MAP3K11	mitogen-activated protein kinase kinase kinase 11
3016	11_64644075_65644075	All_African_meta-analysis	Glom.NephQTL2	0.992693	ENSG00000172922	RNASEH2C	ribonuclease H2 subunit C
4510	6_131321303_132321303	All_African_meta-analysis	Tube.NephQTL2	0.992367	ENSG00000154269	ENPP3	ectonucleotide pyrophosphatase/phosphodiesterase 3
3763	6_131321303_132321303	All_African_meta-analysis	Tube.NephQTL2	0.992305	ENSG00000256162	SMLR1	small leucine rich protein 1
3036	15_75713980_76713980	All_African_meta-analysis	Glom.NephQTL2	0.991255	ENSG00000140400	MAN2C1	mannosidase alpha class 2C member 1
3697	17_37234482_38234482	All_African_meta-analysis	Glom.NephQTL2	0.991077	ENSG00000161395	PGAP3	post-GPI attachment to proteins phospholipase 3
3008	11_64644075_65644075	All_African_meta-analysis	Glom.NephQTL2	0.987037	ENSG00000172543	CTSW	cathepsin W
4510	6_131321303_132321303	All_African_meta-analysis	Tube.NephQTL2	0.986507	ENSG00000197594	ENPP1	ectonucleotide pyrophosphatase/phosphodiesterase 1
1422	15_75713980_76713980	All_African_meta-analysis	Kidney_Cortex	0.984295	ENSG00000140386	SCAPER	S-phase cyclin A associated protein in the ER
4924	18_76656537_77656537	All_African_meta-analysis	Tube.NephQTL2	0.98116	ENSG00000274828
5314	18_76656537_77656537	All_African_meta-analysis	Glom.NephQTL2	0.981159	ENSG00000274828
5314	18_76656537_77656537	All_African_meta-analysis	Glom.NephQTL2	0.980964	ENSG00000267287
3565	17_37234482_38234482	All_African_meta-analysis	Tube.NephQTL2	0.977442	ENSG00000108306	FBXL20	F-box and leucine rich repeat protein 20
7298	11_4707604_5707604	All_African_meta-analysis	Glom.NephQTL2	0.976874	ENSG00000132256	TRIM5	tripartite motif containing 5
2600	2_73464631_74464631	All_African_meta-analysis	Kidney_Cortex	0.972794	ENSG00000217702
3487	2_73464631_74464631	All_African_meta-analysis	Tube.NephQTL2	0.972788	ENSG00000144035	NAT8	N-acetyltransferase 8 (putative)
3467	2_73464631_74464631	All_African_meta-analysis	Glom.NephQTL2	0.972782	ENSG00000144035	NAT8	N-acetyltransferase 8 (putative)
3467	2_73464631_74464631	All_African_meta-analysis	Glom.NephQTL2	0.97235	ENSG00000257800	FNBP1P1
2600	2_73464631_74464631	All_African_meta-analysis	Kidney_Cortex	0.97195	ENSG00000257800	FNBP1P1
5783	7_786192_1786192	All_African_meta-analysis	Tube.NephQTL2	0.96998	ENSG00000164818	DNAAF5	dynein axonemal assembly factor 5
5783	7_786192_1786192	All_African_meta-analysis	Tube.NephQTL2	0.969956	ENSG00000225968	ELFN1	extracellular leucine rich repeat and fibronectin type III domain containing 1
5783	7_786192_1786192	All_African_meta-analysis	Tube.NephQTL2	0.96982	ENSG00000178381	ZFAND2A	zinc finger AN1-type containing 2A
5783	7_786192_1786192	All_African_meta-analysis	Tube.NephQTL2	0.969817	ENSG00000164855	TMEM184A	transmembrane protein 184A
4701	7_786192_1786192	All_African_meta-analysis	Kidney_Cortex	0.969752	ENSG00000229043	ZFAND2A-DT
5985	7_786192_1786192	All_African_meta-analysis	Glom.NephQTL2	0.969698	ENSG00000229043	ZFAND2A-DT
5783	7_786192_1786192	All_African_meta-analysis	Tube.NephQTL2	0.969689	ENSG00000229043	ZFAND2A-DT
5696	7_786192_1786192	All_African_meta-analysis	Tube.NephQTL2	0.969137	ENSG00000188191	PRKAR1B	protein kinase cAMP-dependent type I regulatory subunit beta
5985	7_786192_1786192	All_African_meta-analysis	Glom.NephQTL2	0.966695	ENSG00000178381	ZFAND2A	zinc finger AN1-type containing 2A
3487	2_73464631_74464631	All_African_meta-analysis	Tube.NephQTL2	0.966478	ENSG00000124356	STAMBP	STAM binding protein
4781	4_76910318_77910318	All_African_meta-analysis	Tube.NephQTL2	0.962038	ENSG00000138744	NAAA	N-acylethanolamine acid amidase
4959	4_76910318_77910318	All_African_meta-analysis	Glom.NephQTL2	0.961938	ENSG00000138744	NAAA	N-acylethanolamine acid amidase
5120	4_76910318_77910318	All_African_meta-analysis	Glom.NephQTL2	0.961638	ENSG00000189157	FAM47E	family with sequence similarity 47 member E
3924	4_76910318_77910318	All_African_meta-analysis	Kidney_Cortex	0.961176	ENSG00000189157	FAM47E	family with sequence similarity 47 member E
2732	17_18972894_19972894	All_African_meta-analysis	Tube.NephQTL2	0.959669	ENSG00000072210	ALDH3A2	aldehyde dehydrogenase 3 family member A2
4479	6_160174632_161174632	All_African_meta-analysis	Glom.NephQTL2	0.959075	ENSG00000213071	LPAL2
3924	4_76910318_77910318	All_African_meta-analysis	Kidney_Cortex	0.958582	ENSG00000138750	NUP54	nucleoporin 54
5985	7_786192_1786192	All_African_meta-analysis	Glom.NephQTL2	0.955297	ENSG00000225968	ELFN1	extracellular leucine rich repeat and fibronectin type III domain containing 1
4701	7_786192_1786192	All_African_meta-analysis	Kidney_Cortex	0.954838	ENSG00000164880	INTS1	integrator complex subunit 1
3565	17_37234482_38234482	All_African_meta-analysis	Tube.NephQTL2	0.953894	ENSG00000108344	PSMD3	proteasome 26S subunit, non-ATPase 3
3792	4_76910318_77910318	All_African_meta-analysis	Kidney_Cortex	0.950513	ENSG00000138744	NAAA	N-acylethanolamine acid amidase
5149	11_5793717_6793717	All_African_meta-analysis	Glom.NephQTL2	0.948999	ENSG00000051009	FHIP1B	FHF complex subunit HOOK interacting protein 1B
3241	9_97251621_98251621	All_African_meta-analysis	Glom.NephQTL2	0.943258	ENSG00000232063
2811	17_18972894_19972894	All_African_meta-analysis	Glom.NephQTL2	0.939818	ENSG00000230197
4921	4_76910318_77910318	All_African_meta-analysis	Tube.NephQTL2	0.934631	ENSG00000163749	CCDC158	coiled-coil domain containing 158
3850	15_44721609_45721609	All_African_meta-analysis	Tube.NephQTL2	0.933794	ENSG00000259433
2735	11_64644075_65644075	All_African_meta-analysis	Tube.NephQTL2	0.916696	ENSG00000172818	OVOL1	ovo like transcriptional repressor 1
3980	15_44721609_45721609	All_African_meta-analysis	Glom.NephQTL2	0.915905	ENSG00000259539
3036	15_45639843_46639843	All_African_meta-analysis	Kidney_Cortex	0.911511	ENSG00000259520	SLC28A2-AS1
4008	15_45639843_46639843	All_African_meta-analysis	Tube.NephQTL2	0.907558	ENSG00000259433
2735	11_64644075_65644075	All_African_meta-analysis	Tube.NephQTL2	0.903611	ENSG00000068971	PPP2R5B	protein phosphatase 2 regulatory subunit B'beta
4672	6_131321303_132321303	All_African_meta-analysis	Glom.NephQTL2	0.899022	ENSG00000154269	ENPP3	ectonucleotide pyrophosphatase/phosphodiesterase 3
3980	15_44721609_45721609	All_African_meta-analysis	Glom.NephQTL2	0.893421	ENSG00000137860	SLC28A2	solute carrier family 28 member 2
5783	7_786192_1786192	All_African_meta-analysis	Tube.NephQTL2	0.887425	ENSG00000226291
3566	9_97251621_98251621	All_African_meta-analysis	Tube.NephQTL2	0.885875	ENSG00000148120	AOPEP	aminopeptidase O (putative)
3565	17_37234482_38234482	All_African_meta-analysis	Tube.NephQTL2	0.867018	ENSG00000265460
3850	15_44721609_45721609	All_African_meta-analysis	Tube.NephQTL2	0.865317	ENSG00000259539
4921	4_76910318_77910318	All_African_meta-analysis	Tube.NephQTL2	0.822196	ENSG00000118804	STBD1	starch binding domain 1
3141	15_44721609_45721609	All_African_meta-analysis	Kidney_Cortex	0.818698	ENSG00000137860	SLC28A2	solute carrier family 28 member 2
3016	11_64644075_65644075	All_African_meta-analysis	Glom.NephQTL2	0.813622	ENSG00000255120	OVOL1-AS1	OVOL1 antisense RNA 1
3156	9_97251621_98251621	All_African_meta-analysis	Tube.NephQTL2	0.805489	ENSG00000232063
5783	7_786192_1786192	All_African_meta-analysis	Tube.NephQTL2	0.793369	ENSG00000164828	SUN1	Sad1 and UNC84 domain containing 1
3467	2_73464631_74464631	All_African_meta-analysis	Glom.NephQTL2	0.788221	ENSG00000217702
4924	18_76656537_77656537	All_African_meta-analysis	Tube.NephQTL2	0.786236	ENSG00000060069	CTDP1	CTD phosphatase subunit 1
2811	17_18972894_19972894	All_African_meta-analysis	Glom.NephQTL2	0.783764	ENSG00000189152	GRAPL	GRB2 related adaptor protein like
2735	11_64644075_65644075	All_African_meta-analysis	Tube.NephQTL2	0.778622	ENSG00000168056	LTBP3	latent transforming growth factor beta binding protein 3
2374	11_64644075_65644075	All_African_meta-analysis	Kidney_Cortex	0.773537	ENSG00000172543	CTSW	cathepsin W
1469	15_75713980_76713980	All_African_meta-analysis	Tube.NephQTL2	0.764343	ENSG00000178718	RPP25	ribonuclease P and MRP subunit p25
3682	9_97251621_98251621	All_African_meta-analysis	Glom.NephQTL2	0.760696	ENSG00000231806	PCAT7
4493	18_76656537_77656537	All_African_meta-analysis	Tube.NephQTL2	0.755062	ENSG00000141759	TXNL4A	thioredoxin like 4A
2771	2_73464631_74464631	All_African_meta-analysis	Tube.NephQTL2	0.739084	ENSG00000204822	MRPL53	mitochondrial ribosomal protein L53
3001	15_75713980_76713980	All_African_meta-analysis	Glom.NephQTL2	0.738674	ENSG00000140398	NEIL1	nei like DNA glycosylase 1
4353	6_160174632_161174632	All_African_meta-analysis	Tube.NephQTL2	0.734103	ENSG00000146477	SLC22A3	solute carrier family 22 member 3
3487	2_73464631_74464631	All_African_meta-analysis	Tube.NephQTL2	0.729421	ENSG00000257800	FNBP1P1
3880	15_45639843_46639843	All_African_meta-analysis	Glom.NephQTL2	0.728285	ENSG00000259520	SLC28A2-AS1
3194	15_75713980_76713980	All_African_meta-analysis	Glom.NephQTL2	0.715861	ENSG00000260269
2885	15_75713980_76713980	All_African_meta-analysis	Tube.NephQTL2	0.710013	ENSG00000140365	COMMD4	COMM domain containing 4

## Sheet: ALLTests
Coloc_All_African_meta-analysis.biomart
