# Supplementary material for: KidneyGenAfrica: A multi-cohort Genome-wide association study and polygenic prediction of kidney function in 110,000 continental and diasporan Africans
Source: Research Square preprint supplement (doi:10.21203/rs.3.rs-5555692/v1), 2024-12-19
Supplement: Supplementary file 4 [file 7df3b85173712d66ddc4a5ee.docx]

| **Table.S1 Basic characteristics of studies or cohorts included in this meta-analysis of eGFR in African ancestry populations** | | | | |
| --- | --- | --- | --- | --- |
| Cohort/ study | Country of origin | Geographical Region | Sample (n (%) | Number of SNPs |
| MEIRU | Malawi | Southern Africa | 6380 (5.83) | 20,125,941 |
| ARK | South Africa | Southern Africa | 1060 (0.97) | 16,709,600 |
| AWI-Gen | South Africa | Southern Africa | 4527 (4.14) | 17,572,045 |
| UGR wave 1 | Uganda | Eastern Africa | 4407 (4.01) | 20,596,936 |
| UGR wave 2 | Uganda | Eastern Africa | 2301(1.87) | 20,596,936 |
| AADM | Kenya | Eastern Africa | 2069 (1.89) | 6,518,420 |
| AWI-Gen | Kenya | Eastern Africa | 1704 (1.56) | 17,265,628 |
| AADM | Nigeria | Western Africa | 2069 (1.89) | 8,047,582 |
| AADM | Ghana | Western Africa | 1060 (0.97) | 7,958,170 |
| AWI-Gen | Burkina Faso & Ghana | Western Africa | 3475 (3.18) | 15,680,497 |
| MVP | US | Diaspora Africa | 57,336 (52.1) | 16,427,567 |
| UKBB | UK | Diaspora Africa | 6856 (6.27) | 21,964,220 |
| CKDGen | US, UK | Diaspora Africa | 16,473 (15.06) | 23,253,490 |
| MEIRU; Malawi Epidemiology and Intervention Research Unit, ARK; African Research on Kidney Disease, AWI-Gen; Africa Wits-INDEPTH partnership for Genomic Studies, UGR; Uganda Genome Resources, AADM; Africa America Diabetes Mellitus, MVP; Million Veteran Program, UKBB; UK BioBank; CKDGen; Chronic Kidney Disease Genetic, SNPs; single nucleotide polymorphisms | | | | |
