# Supplementary material for: KidneyGenAfrica: A multi-cohort Genome-wide association study and polygenic prediction of kidney function in 110,000 continental and diasporan Africans
Source: Research Square preprint supplement (doi:10.21203/rs.3.rs-5555692/v1), 2024-12-19
Supplement: Supplementary file 5 [file c226a9500ecb94b96a04579f.xlsx]

## Sheet: Sheet1
	Phenotype	Threshold	PRS.R2	Full.R2	Null.R2	Coefficient	Standard.Error	P	Num_SNP	PRS parameters
	South	0.00110005	0.192681	0.216339	0.214412	-0.0106031	0.0038468	0.00587927	4670	PAR_250_r0.1
	-	0.00110005	0.247595	0.216888	0.214412	-0.0114667	0.00366859	0.00179064	4959	PAR_250_r0.2
	-	0.00110005	0.241914	0.216832	0.214412	-0.00941628	0.00304787	0.002023	5809	PAR_250_r0.5
	-	0.0462501	0.185644	0.216269	0.214412	-0.00241388	0.000892236	0.00685893	109930	PAR_500_r0.1
	-	0.00110005	0.198387	0.216396	0.214412	-0.0107387	0.00383941	0.00519029	4851	PAR_500_r0.2
	-	0.00110005	0.210748	0.21652	0.214412	-0.00911116	0.00316029	0.00396597	5737	PAR_500_r0.5
	-	0.0461501	0.207513	0.216488	0.214412	-0.0026162	0.000914519	0.00425483	107490	PAR_800_r0.1
	-	0.00110005	0.214421	0.216557	0.214412	-0.0112704	0.00387553	0.00366218	4824	PAR_800_r0.2
	-	0.00110005	0.213604	0.216548	0.214412	-0.00921538	0.00317494	0.00372768	5724	PAR_800_r0.5
	-	0.0461501	0.202082	0.216433	0.214412	-0.00260163	0.000921595	0.00478857	106837	PAR_1000_r0.1
	-	0.00110005	0.221027	0.216623	0.214412	-0.0114795	0.00388781	0.00317392	4812	PAR_1000_r0.2
	-	0.00110005	0.215642	0.216569	0.214412	-0.00927552	0.00318048	0.00356648	5722	PAR_1000_r0.5
	east	0.00560005	0.0830578	0.215243	0.214412	0.00344431	0.00190459	0.0706365	28627	PAR_250_r0.1
	-	0.00560005	0.0562442	0.214975	0.214412	0.00260768	0.00175258	0.136877	31371	PAR_250_r0.2
	-	0.00560005	0.0522696	0.214935	0.214412	0.00203472	0.00141858	0.151577	37712	PAR_250_r0.5
	-	0.00560005	0.0735577	0.215148	0.214412	0.00343757	0.00202	0.0888999	27670	PAR_500_r0.1
	-	0.00260005	0.0609075	0.215021	0.214412	0.00395847	0.00255647	0.121626	15607	PAR_500_r0.2
	-	0.00260005	0.0580912	0.214993	0.214412	0.00314828	0.00208197	0.130595	18405	PAR_500_r0.5
	-	0.00560005	0.0728989	0.215141	0.214412	0.00350126	0.00206672	0.0903431	27288	PAR_800_r0.1
	-	0.00260005	0.0593153	0.215006	0.214412	0.00395968	0.00259138	0.126609	15506	PAR_800_r0.2
	-	0.00260005	0.0584416	0.214997	0.214412	0.00317535	0.00209357	0.12944	18359	PAR_800_r0.5
	-	0.00560005	0.0714497	0.215127	0.214412	0.00348214	0.00207619	0.093608	27194	PAR_1000_r0.1
	-	5.005e-05	0.0557513	0.21497	0.214412	-0.0192327	0.0129831	0.13861	437	PAR_1000_r0.2
	-	0.00260005	0.0592912	0.215005	0.214412	0.00320129	0.00209548	0.126686	18355	PAR_1000_r0.5
	west	0.0221001	0.127397	0.215686	0.214412	0.00252356	0.00112642	0.0251392	80030	PAR_250_r0.1
	-	0.0199501	0.102489	0.215437	0.214412	0.00204564	0.00101818	0.0446116	84335	PAR_250_r0.2
	-	0.00980005	0.100041	0.215413	0.214412	0.00209965	0.00105779	0.0472388	54088	PAR_250_r0.5
	-	0.0199501	0.103778	0.21545	0.214412	0.0024933	0.00123326	0.0432905	70936	PAR_500_r0.1
	-	0.0199501	0.0831189	0.215244	0.214412	0.00190119	0.00105091	0.0705329	82653	PAR_500_r0.2
	-	0.00980005	0.099413	0.215407	0.214412	0.00211847	0.00107064	0.047939	53709	PAR_500_r0.5
	-	0.0101501	0.0877332	0.21529	0.214412	0.0029046	0.00156272	0.0631661	39773	PAR_800_r0.1
	-	0.0199501	0.0756477	0.215169	0.214412	0.00182443	0.00105715	0.0844841	82190	PAR_800_r0.2
	-	0.00980005	0.0942208	0.215355	0.214412	0.00206648	0.00107279	0.0541628	53648	PAR_800_r0.5
	-	0.0183501	0.080839	0.215221	0.214412	0.00229742	0.00128773	0.0745073	65245	PAR_1000_r0.1
	-	0.0199501	0.0757055	0.215169	0.214412	0.00182658	0.00105799	0.0843655	82074	PAR_1000_r0.2
	-	0.00980005	0.0959988	0.215372	0.214412	0.0020873	0.00107351	0.0519404	53635	PAR_1000_r0.5
	kontinental	0.00445005	0.0548451	0.214961	0.214412	-0.00410037	0.00279075	0.14186	29512	PAR_250_r0.1
	-	0.00445005	0.0795187	0.215208	0.214412	-0.00458491	0.00259116	0.0769183	31881	PAR_250_r0.2
	-	0.0356001	0.0597057	0.215009	0.214412	-0.00121737	0.000794086	0.125367	254494	PAR_250_r0.5
	-	0.0397501	0.0600305	0.215013	0.214412	-0.00206725	0.0013448	0.124343	171031	PAR_500_r0.1
	-	0.00445005	0.0751584	0.215164	0.214412	-0.00468842	0.00272551	0.0854961	31104	PAR_500_r0.2
	-	0.0356001	0.0578383	0.214991	0.214412	-0.00123618	0.000819278	0.131436	250742	PAR_500_r0.5
	-	0.0397501	0.0882454	0.215295	0.214412	-0.00260037	0.00139496	0.0624004	166341	PAR_800_r0.1
	-	0.21425	0.079393	0.215206	0.214412	-0.00116727	0.000660203	0.0771523	755739	PAR_800_r0.2
	-	0.0397501	0.0608871	0.215021	0.214412	-0.0012135	0.000783836	0.121688	276204	PAR_800_r0.5
	-	0.0397501	0.0856068	0.215268	0.214412	-0.00259543	0.00141363	0.0664533	164715	PAR_1000_r0.1
	-	0.2143	0.0793603	0.215206	0.214412	-0.00117566	0.000665089	0.0772132	749686	PAR_1000_r0.2
	-	0.0356001	0.0600728	0.215013	0.214412	-0.00127342	0.000828105	0.124211	249602	PAR_1000_r0.5
	diaspora	0.00030005	0.154541	0.215958	0.214412	-0.00371115	0.00150375	0.0136436	1898	PAR_250_r0.1
	-	0.0457001	0.24051	0.216817	0.214412	0.000751289	0.000243889	0.00208503	192728	PAR_250_r0.2
	-	0.0852501	0.321661	0.217629	0.214412	0.000617015	0.00017311	0.000370359	455708	PAR_250_r0.5
	-	0.27785	0.156224	0.215975	0.214412	0.000500425	0.000201674	0.0131411	537232	PAR_500_r0.1
	-	0.1655	0.265253	0.217065	0.214412	0.000583642	0.000180385	0.00122691	523019	PAR_500_r0.2
	-	0.186	0.32687	0.217681	0.214412	0.000496067	0.000138059	0.000331791	900989	PAR_500_r0.5
	-	0.4997	0.191788	0.21633	0.214412	0.000546662	0.00019879	0.00599517	713206	PAR_800_r0.1
	-	0.16705	0.261933	0.217032	0.214412	0.00058653	0.000182426	0.00131712	517741	PAR_800_r0.2
	-	0.186	0.331698	0.217729	0.214412	0.000501451	0.000138534	0.000299667	897274	PAR_800_r0.5
	-	0.4997	0.194173	0.216354	0.214412	0.00055434	0.000200338	0.00569055	700739	PAR_1000_r0.1
	-	0.16705	0.254996	0.216962	0.214412	0.000578621	0.000182406	0.00152789	514960	PAR_1000_r0.2
	-	0.186	0.328204	0.217694	0.214412	0.000499558	0.000138747	0.000322585	896347	PAR_1000_r0.5
	Pan	0.00135005	0.101135	0.215424	0.214412	-0.00823822	0.00412783	0.0460458	11681	PAR_250_r0.1
	-	0.00135005	0.101742	0.21543	0.214412	-0.00806369	0.0040283	0.0453973	12225	PAR_250_r0.2
	-	0.00070005	0.0674438	0.215087	0.214412	-0.00742582	0.00455727	0.103321	7292	PAR_250_r0.5
	-	0.00305005	0.088537	0.215298	0.214412	-0.00613698	0.00328674	0.061969	23494	PAR_500_r0.1
	-	0.00305005	0.0967775	0.21538	0.214412	-0.00614468	0.00314748	0.0509978	25198	PAR_500_r0.2
	-	0.00025005	0.0614098	0.215026	0.214412	-0.0105189	0.00676548	0.120099	2780	PAR_500_r0.5
	-	0.00070005	0.0799069	0.215211	0.214412	-0.00914945	0.00515822	0.0762009	6173	PAR_800_r0.1
	-	0.00070005	0.093525	0.215348	0.214412	-0.00968662	0.0050474	0.0550596	6457	PAR_800_r0.2
	-	0.00025005	0.0584549	0.214997	0.214412	-0.0103296	0.00680975	0.129396	2774	PAR_800_r0.5
	-	0.00070005	0.0748222	0.215161	0.214412	-0.00886406	0.0051645	0.0861992	6158	PAR_1000_r0.1
	-	0.00070005	0.0877352	0.21529	0.214412	-0.00939951	0.00505701	0.063163	6449	PAR_1000_r0.2
	-	0.00025005	0.0577008	0.214989	0.214412	-0.0102655	0.00681155	0.131896	2773	PAR_1000_r0.5
	muti-anestry	5e-08	0.0370965	0.214783	0.214412	0.272006	0.225126	0.227049	1602	PAR_250_r0.1
	-	5e-08	0.0513956	0.214926	0.214412	0.240655	0.169203	0.155044	2133	PAR_250_r0.2
	-	5e-08	0.0432158	0.214845	0.214412	0.106975	0.0820278	0.192284	3727	PAR_250_r0.5
	-	0.0540001	0.0424209	0.214837	0.214412	-0.0877301	0.0678984	0.196426	95941	PAR_500_r0.1
	-	5e-08	0.0470569	0.214883	0.214412	0.233992	0.17194	0.173647	2095	PAR_500_r0.2
	-	5e-08	0.0425838	0.214838	0.214412	0.107647	0.0831532	0.195569	3695	PAR_500_r0.5
	-	0.0540001	0.0343922	0.214756	0.214412	-0.0793947	0.0682471	0.24478	94941	PAR_800_r0.1
	-	5e-08	0.0467067	0.214879	0.214412	0.233559	0.172264	0.175257	2088	PAR_800_r0.2
	-	5e-08	0.0421861	0.214834	0.214412	0.107163	0.0831688	0.197669	3690	PAR_800_r0.5
	-	0.0540001	0.0372646	0.214785	0.214412	-0.0827596	0.0683416	0.225999	94564	PAR_1000_r0.1
	-	5e-08	0.0435925	0.214848	0.214412	0.226261	0.172744	0.190357	2084	PAR_1000_r0.2
	-	5e-08	0.0409013	0.214821	0.214412	0.105581	0.0832192	0.204639	3688	PAR_1000_r0.5
