# Supplementary material for: KidneyGenAfrica: A multi-cohort Genome-wide association study and polygenic prediction of kidney function in 110,000 continental and diasporan Africans
Source: Research Square preprint supplement (doi:10.21203/rs.3.rs-5555692/v1), 2024-12-19
Supplement: Supplementary file 6 [file dae180f3da4107521c7877eb.docx]

| **Table. S8 Phenome-wide association study in performed in pan-africa ancestry** | | | | | | | | |
| --- | --- | --- | --- | --- | --- | --- | --- | --- |
| **atlas ID** | **PMID** | **Year** | **Domain** | **Trait** | **P-value** | **N** | **EA** | **NEA** |
| 4205 | 31152163 | 2019 | Metabolic | Estimated glomerular filtration rate | 1.51E-131 | 765348 | C | T |
| 4206 | 31152163 | 2019 | Metabolic | Estimated glomerular filtration rate | 1.10E-124 | 567460 | C | T |
| 4215 | 31015462 | 2019 | Metabolic | Estimated glomerular filtration rate | 3.31E-53 | 350504 | C | T |
| 4063 | 28452372 | 2017 | Metabolic | Estimated glomerular filtration rate based on serum creatinine | 2.80E-39 | 110527 | C | T |
| 862 | 27005778 | 2016 | Metabolic | Creatinine | 1.38E-13 | 24810 | T | C |
| 4210 | 31152163 | 2019 | Metabolic | Chronic kidney disease | 2.77E-13 | 480698 | T | C |
| 4209 | 31152163 | 2019 | Metabolic | Chronic kidney disease | 7.54E-13 | 625219 | T | C |
| 3447 | 31427789 | 2019 | Metabolic | Impedance measures - Impedance of whole body | 1.25E-09 | 379792 | C | T |
| 4357 | 30220432 | 2018 | Metabolic | Albuminuria | 3.65E-09 | 382500 | C | T |
| 3470 | 31427789 | 2019 | Metabolic | Impedance measures - Trunk fat-free mass | 1.02E-08 | 379507 | T | C |
| 3471 | 31427789 | 2019 | Metabolic | Impedance measures - Trunk predicted mass | 1.18E-08 | 379469 | T | C |
| 3451 | 31427789 | 2019 | Metabolic | Impedance measures - Impedance of arm (left) | 1.68E-07 | 379803 | C | T |
| 3444 | 31427789 | 2019 | Metabolic | Impedance measures - Whole body water mass | 4.81E-07 | 379835 | T | C |
| 3466 | 31427789 | 2019 | Metabolic | Impedance measures - Arm fat-free mass (left) | 6.48E-07 | 379653 | T | C |
| 4204 | 31217584 | 2019 | Metabolic | Estimated glomerular filtration rate | 6.53E-07 | 27900 | C | T |
| 3443 | 31427789 | 2019 | Metabolic | Impedance measures - Whole body fat-free mass | 1.125E-06 | 379804 | T | C |
| 3467 | 31427789 | 2019 | Metabolic | Impedance measures - Arm predicted mass (left) | 1.214E-06 | 379638 | T | C |
| 3450 | 31427789 | 2019 | Metabolic | Impedance measures - Impedance of arm (right) | 2.364E-06 | 379786 | C | T |
| 3462 | 31427789 | 2019 | Metabolic | Impedance measures - Arm fat-free mass (right) | 2.857E-06 | 379723 | T | C |
| 3463 | 31427789 | 2019 | Metabolic | Impedance measures - Arm predicted mass (right) | 2.944E-06 | 379716 | T | C |
| 3449 | 31427789 | 2019 | Metabolic | Impedance measures - Impedance of leg (left) | 6.054E-06 | 379807 | C | T |
| 3448 | 31427789 | 2019 | Metabolic | Impedance measures - Impedance of leg (right) | 9.513E-06 | 379813 | C | T |
| 3446 | 31427789 | 2019 | Metabolic | Impedance measures - Basal metabolic rate | 0.00001776 | 379821 | T | C |
| 4301 | 30664634 | 2019 | Metabolic | Arms-arm fat ratio (male) | 0.00003188 | 167431 | T | C |
| 4109 | 29403010 | 2018 | Metabolic | Serum creatinine | 0.0001925 | 142097 | T | C |
