# Supplementary material for: KidneyGenAfrica: A multi-cohort Genome-wide association study and polygenic prediction of kidney function in 110,000 continental and diasporan Africans
Source: Research Square preprint supplement (doi:10.21203/rs.3.rs-5555692/v1), 2024-12-19
Supplement: Supplementary file 7 [file f5b14b8026f7a67773673640.docx]

| TableS2. Distribution of APOL1 gene in continental Africa | | | | |
| --- | --- | --- | --- | --- |
|  | east AFR  N = 8075 | south AFR  N = 11743 | west AFR  N = 3473 | All  N = 23291 |
| Haplotypes | n (%) | n (%) | n (%) | n (%) |
| G0/G0 | 5908 (73.2) | 6386 (54.4) | 2082 (59.9) | 14376 (61.7) |
| G0/G1 | 957 (11.9) | 1715 (14.6) | 699 (20.1) | 3371 (14.5) |
| G0/G2 | 1035 (12.8) | 2778 (23.7) | 546 (15.7) | 4359 (18.7) |
| G1/G1 | 30 (0.4) | 94 (0.8) | 34 (1) | 158 (0.7) |
| G1/G2 | 89 (1.1) | 420 (3.6) | 77 (2.2) | 586 (2.5) |
| G2/G2 | 56 (0.7) | 350 (2.9) | 35 (1) | 441 (1.9) |
| High-risk haplotypes | 175 (2.2) | 864 (7.4) | 146 (4.2) | 1185 (5.1) |
| Alleles |  |  |  |  |
| G0 allele | 13808 (85.5) | 17265 (73.5) | 5409 (77.9) | 36482 (78.3) |
| G1 allele | 1106 (6.8) | 2323 (9.9) | 844 (12.2) | 4273 (9.2) |
| G2 allele | 1236 (7.7) | 3898 (16.6) | 693 (10) | 5827 (12.5) |
|  |  |  |  |  |
